# Supplementary material for: iHyd-PseAAC: Predicting Hydroxyproline and Hydroxylysine in Proteins by Incorporating Dipeptide Position-Specific Propensity into Pseudo Amino Acid Composition
Source: MDPI journal article supplement (doi:10.3390/ijms15057594), 2014-05-05
Supplement: s1 [file s1]

## Supplementary Information

**Supplementary Information S3.** The positive dataset  $\mathbb{S}_{\text{Hyp}}^+$  and negative dataset  $\mathbb{S}_{\text{Hyp}}^-$  contain 306 hydroxyproline peptide fragments and 1035 non-hydroxyproline peptide fragments, respectively. None of the sequences included has  $\geq 40\%$  pairwise sequence identity with any other in a same subset. See the text of the paper for further explanation.

Positive dataset

| Uniprot ID | Position | Fragments                            |
|------------|----------|--------------------------------------|
| Q3Y5Z3     | 39       | GWMAGI <b>P</b> GH <sub>HP</sub> GHN |
| Q3Y5Z3     | 42       | AGI <b>P</b> GH <sub>HP</sub> GHNGTP |
| Q3Y5Z3     | 48       | PGHNGT <b>P</b> GRDGRD               |
| Q3Y5Z3     | 86       | ITGIEG <b>P</b> RGFPGT               |
| Q15848     | 71       | KGEKGD <b>P</b> GLIGPK               |
| Q15848     | 76       | DPGLIG <b>P</b> KGDIGE               |
| Q15848     | 95       | EGPRGF <b>P</b> G IQGRK              |
| P07550     | 382      | LLCEDL <b>P</b> GTEDFV               |
| P07550     | 395      | GHQGT <b>V</b> PSDNIDS               |
| Q9UKV8     | 700      | LEKDY <b>Q</b> PGITFIV               |
| Q0VTT8     | 52       | KRFEP <b>V</b> PGFTPF                |
| P84900     | 54       | ESPDR <b>P</b> PGFSPFR               |
| Q4ZJN1     | 58       | KGDAGE <b>P</b> GH <sub>HP</sub> GGP |
| Q4ZJN1     | 76       | RGEKGE <b>P</b> GADGRV               |
| Q4ZJN1     | 115      | TGEQGL <b>P</b> GETGPQ               |
| Q4ZJN1     | 151      | LGPKGL <b>P</b> GPMGPI               |
| Q4ZJN1     | 160      | MGPIG <b>K</b> PGPRGEA               |
| P58843     | 5        | XXDQSC <b>P</b> WCGFTC               |
| P58923     | 10       | GRDSRC <b>P</b> PVCCMG               |
| P58923     | 11       | RDSRC <b>P</b> PVCCMGL               |
| P50982     | 46       | LTARRD <b>P</b> CCYHPT               |
| P69747     | 55       | RGCCSD <b>P</b> RCNYDH               |
| P85886     | 55       | RTCCSR <b>P</b> TCRMEY               |
| P85012     | 7        | DYCCRR <b>P</b> PCTLIC               |
| P85012     | 8        | YCCRR <b>P</b> PCTLICX               |
| P0C1X1     | 40       | VVHERA <b>P</b> ELV <sub>HP</sub> TA |
| P0C1X1     | 55       | NCCGY <b>N</b> PMTICPP               |
| P0C1X1     | 60       | NPMTIC <b>P</b> PCMCTY               |
| P0C1X1     | 61       | PMTIC <b>P</b> PCMCTYS               |
| P0C1X1     | 69       | MCTYSC <b>P</b> PKRKPG               |
| P0C1X1     | 70       | CTYSC <b>P</b> PKRKPGR               |
| P0C1X1     | 74       | CPPKR <b>K</b> PGRRNDX               |
| P69746     | 5        | XXCCGV <b>P</b> NAACHP               |
| P69746     | 11       | PNAACH <b>P</b> CVCKNT               |
| P55963     | 20       | CSCKDR <b>P</b> SYCGQX               |
| P30754     | 21       | IGPRGP <b>P</b> GPPGSP               |
| P30754     | 27       | PGPPGS <b>P</b> GQQGYQ               |
| P30754     | 39       | QGLRGE <b>P</b> GD SGPM              |
| P30754     | 72       | DGRDGE <b>P</b> GPRGGI               |
| P30754     | 90       | RGAGGM <b>P</b> GM PGPK              |
| P30754     | 93       | GGMPGM <b>P</b> GPKGHR               |
| P30754     | 128      | GPGPAG <b>P</b> SGPIGP               |
| P30754     | 150      | DGKSGL <b>P</b> GLRGVD               |
| P30754     | 177      | TGSPGF <b>P</b> GTPGSK               |
| P30754     | 207      | VGLSG <b>Q</b> PGVAGEN               |
| P30754     | 216      | AGENG <b>H</b> PGMPGMD               |
| P30754     | 219      | NGHPGM <b>P</b> GMDGAN               |
| P30754     | 228      | DGANGE <b>P</b> GASGES               |

---

|        |      |                 |
|--------|------|-----------------|
| P30754 | 237  | SGESGLPGPSGFP   |
| P30754 | 276  | QGRPGAPGVKGSS   |
| P30754 | 285  | KGSSGP PGDVGAP  |
| P30754 | 291  | PGDVGAPGHAGEA   |
| P30754 | 303  | AGKRGS PGSPGPA  |
| P30754 | 321  | QGDRGLPGSRGLP   |
| P30754 | 327  | PGSRGLPGMTGAS   |
| P30754 | 339  | SGAMGI PGEKGPS  |
| P30754 | 348  | KGPSGE PGA KGPT |
| P30754 | 372  | PGIAGLPGNPGSD   |
| P30754 | 429  | PGKNGAPGEPGAH   |
| P30754 | 483  | AGAQT PGEAGKT   |
| P30754 | 513  | GGERGAPGDRGNV   |
| P30754 | 525  | VGPRGMPGERGAT   |
| P30754 | 540  | AGPTGS PGVAGAK  |
| P30754 | 552  | KGQGGP PG PAGLV |
| P30754 | 645  | QGIQGQPGPPGDA   |
| P30754 | 663  | KGDIGF PGERGTR  |
| P30754 | 744  | KGARGS PGLVGKQ  |
| P30754 | 774  | RGEDGP PGVSGPT  |
| P30754 | 843  | SGQAGAPGQEGAP   |
| P30754 | 861  | PGLAGR PGERGEP  |
| P30754 | 53   | PIGKRGP PG PAGI |
| P30754 | 416  | LQGRAG PPGARGE  |
| P30754 | 503  | ATGPSG PAGPGGE  |
| P30754 | 506  | PSGPAG PGGERGA  |
| P30754 | 533  | ERGATG PAGPTGS  |
| P30754 | 647  | IQQQPG PG DAGP  |
| P30754 | 773  | ERGEDG PGVSGP   |
| P30754 | 815  | MKGDGG PPGPSGD  |
| P30754 | 990  | PGKDGQ PPGSGRV  |
| P30754 | 1010 | DDGRSG PPGPPGP  |
| P30754 | 1019 | PPGPPG PPGNSDY  |
| Q24940 | 109  | ANNRAV PDKIDWR  |
| Q24940 | 196  | ETESSY PYTAVEG  |
| P58804 | 21   | FKTCCG PGDWQC   |
| P58804 | 22   | KTCCGP PGDWQCV  |
| P0C8S5 | 10   | IYDAKP PFSCAGL  |
| P0C8S5 | 24   | GGCVL PPNLRPKF  |
| P0C8S5 | 28   | LPPNLR PKFKEXX  |
| P84698 | 7    | DCPTRC PTTCANG  |
| P84698 | 21   | ECCKGY PCVNKAC  |
| C3VVN6 | 55   | ECQVDT PGSSWGK  |
| P0C1W5 | 70   | LNRVCG PMCCPAS  |
| P0C1W5 | 74   | CGPMCC PASHCYC  |
| P0C1W6 | 59   | INTRDS PWGRCCR  |
| P08252 | 67   | SQCPGG PTPPTPT  |
| P08252 | 69   | CPGGPT PTPPTPT  |
| P08252 | 71   | GGPTPT PTPPPGG  |
| P08252 | 72   | GPTPTPT PTPPGGG |
| P08252 | 74   | TPTPTPT PPGGDL  |
| P08252 | 75   | PTPTPT PPGGDLG  |
| Q2I2Q5 | 58   | RDECCE PQWCDGA  |
| P01523 | 56   | RRDCCT PPKCKKD  |
| P01523 | 57   | RDCCTP PPKCKDR  |
| P01523 | 67   | KDRQCK PQRCCAG  |
| P58925 | 57   | RLCCGF PKSCRSR  |
| P0C349 | 8    | HGCCKG PKGCSSR  |
| P0C349 | 18   | SSRECR PQHCCXX  |

---

---

|        |      |                |
|--------|------|----------------|
| P56529 | 52   | LLERRHPPCCMYG  |
| P56529 | 53   | LERRHPCCMYGR   |
| P56529 | 64   | GRCRRYPGCSSAS  |
| P0C1N5 | 55   | AVRDCCPLPACPF  |
| P85016 | 5    | XXGCCPPQWCGPD  |
| P85016 | 10   | PPQWCGPDCTSF   |
| P85017 | 11   | RPICTCPCCIGPX  |
| P85020 | 5    | XXGCCSPWNCIQL  |
| P85020 | 15   | IQLRACPCPNXX   |
| P0C8V5 | 57   | RDECFSPGTFCGI  |
| P0C8V5 | 65   | TFCGIKPGLCSSA  |
| D5KR58 | 49   | CWLCLGPNACCRG  |
| P0C8V9 | 55   | AGNYCGPTVMKIC  |
| P0C8V9 | 67   | CCGFCSFFSKICM  |
| P01522 | 49   | STRCKSPGSSCSP  |
| P01522 | 55   | PGSSCSPSYNCC   |
| P01522 | 66   | CCRSCNPYTKRCY  |
| P86289 | 90   | PGATGFPGAAGRG  |
| P02457 | 215  | RGPAGPPGKNGDD  |
| P02457 | 323  | PGAAGPPGPTGPA  |
| P02457 | 377  | AGPAGNPGADGQP  |
| P02457 | 440  | TGAKGEPGPAGVQ  |
| P02457 | 572  | AGVMGFPGPKGAA  |
| P02457 | 653  | PGEQGVPGNAGAP  |
| P02457 | 713  | PGNEGPPGLEGMP  |
| P02457 | 746  | KGADGAPGKDGLR  |
| P02457 | 935  | DGPIGAPGTPGPQ  |
| P02457 | 953  | RGVVGLPGQRGER  |
| P86290 | 6    | XGSNGEPGSAGPP  |
| P02467 | 442  | AGRPGEPLMGPR   |
| P56711 | 76   | CELYAFPSFGAXX  |
| P05539 | 839  | AAGRVGPPGSNGN  |
| P05483 | 7    | CKSPGTPCSRGMR  |
| P0CH13 | 14   | NCDVFRPYRCCSG  |
| P12108 | 158  | PGKPGPPGHIQGV  |
| P12108 | 178  | CPTNCPGPKGPQ   |
| A6YR20 | 65   | WCDQEA PHGNCCD |
| A6YR20 | 82   | TAAWWCPGTKWDX  |
| Q05707 | 1577 | IGIPGTPGVPGIT  |
| Q05707 | 1580 | PGTPGVPGITGSM  |
| Q05707 | 1643 | AILNQIPSHSSSI  |
| Q05707 | 1656 | RTVQGPGEPRP    |
| Q05707 | 1704 | KGEKGNPGVGTQG  |
| Q05707 | 1726 | PSGESRPGSPGPP  |
| Q05707 | 1756 | QGPPSGQPGYCDPS |
| P58922 | 61   | LTTCLAPSECCSE  |
| B2KPN7 | 64   | YHAHPKPNSFWTL  |
| Q6PSU2 | 67   | GRDPYSPSQDPYS  |
| Q6PSU2 | 86   | RRDPYSPSPYDRR  |
| P58786 | 57   | LRRSGCPWEPWCG  |
| P81727 | 13   | AYGESCPSSCNTC  |
| P81755 | 63   | WCCTAAPLTGRXX  |
| P69765 | 49   | RCCPGKPCCRIGX  |
| B2CS62 | 8    | RVENKCPHTVCCD  |
| D2Y171 | 50   | DAADVKPVARTNE  |
| D2Y171 | 58   | ARTNEGPGRDPAP  |
| D2Y171 | 62   | EGPGRDPAPCCQH  |
| D2Y171 | 64   | PGRDPA PCCQHPI |
| D2Y168 | 57   | SSNKCSPGFPGXX  |

---

---

|        |     |                 |
|--------|-----|-----------------|
| P80762 | 6   | XNMYLPVPPPPV    |
| P80762 | 8   | MYLPPVPPPVVP    |
| P80762 | 9   | YLPPVPPPVVPT    |
| P80762 | 10  | LPPVPPPPVVPTF   |
| P80762 | 11  | PPVPPPVPVPTFX   |
| Q7M1I4 | 8   | HYSYSSPPPPPVV   |
| Q7M1I4 | 9   | YSYSSPPPPPVVS   |
| Q7M1I4 | 10  | SYSSPPPPPVSS    |
| Q7M1I4 | 11  | YSSPPPVPVSSP    |
| Q7M1I4 | 17  | PPVVSSPPPPYYY   |
| Q7M1I4 | 19  | VVSSPPPPYYYYS   |
| Q7M1I4 | 26  | PYYYYSPPPVXX    |
| P80774 | 10  | PPDFANFFIIPQN   |
| P82439 | 6   | XNYQYSPPPPKK    |
| P82439 | 7   | NYQYSPPPPKKK    |
| P82439 | 8   | YQYSPPPPKKKY    |
| P82439 | 9   | QYSPPPPKKKYY    |
| P82439 | 10  | YSPPPPPKKKYYX   |
| P86500 | 24  | ECLENYPGQASQR   |
| P86500 | 43  | DATTNCPDTYYFG   |
| B4YSU8 | 51  | GDSCNEPAGELCC   |
| P00057 | 79  | YDYLLNPKKYIPG   |
| P15502 | 116 | AGLGGVPGVGGLG   |
| P15502 | 190 | GAFAGIPGVGPFG   |
| P15502 | 283 | VGGAGVPGVPGAI   |
| P15502 | 286 | AGVPGVPGAIPGI   |
| P15502 | 327 | GLVPGGPGFGPGV   |
| P15502 | 347 | VPGVGPAGAPIV    |
| P15502 | 607 | GVGAGVPGFGAGA   |
| P15502 | 677 | LGGVGI PGGVVGA  |
| A1X158 | 65  | WKATPKPWTAWKA   |
| A1X158 | 72  | WTAWKAPPPAWTA   |
| A1X158 | 73  | TAWKAPPPAWTAW   |
| Q16665 | 402 | ALTLLAPAAGDTI   |
| Q16665 | 564 | DLEMLAPYIPMDD   |
| Q7XAD0 | 51  | GNYGRTPYKTPPP   |
| Q7XAD0 | 55  | RTPYKTPPPPTSS   |
| Q7XAD0 | 56  | TPYKTPPPPTSSS   |
| Q7XAD0 | 57  | PYKTTPPPPTSSSP  |
| Q7XAD0 | 58  | YKTTPPPPTSSSPT  |
| Q7XAD0 | 63  | PPTSSSPTHQEIV   |
| Q7XAD0 | 79  | HDSVLP PPSPKTD  |
| Q7XAD0 | 80  | DSVLPP PPSPKTDP |
| Q7XAD0 | 82  | VLPPPSPKTDPII   |
| Q7XAD0 | 119 | HDYVASPPPPKPQ   |
| Q7XAD0 | 120 | DYVASPPPPKPQD   |
| Q7XAD0 | 121 | YVASPPPPKPQDE   |
| Q7XAD0 | 122 | VASPPPPKPQDEQ   |
| Q93WP8 | 42  | RGANLPPSPASS    |
| Q93WP8 | 43  | GANLPPSPASSP    |
| Q93WP8 | 45  | NLPPPSPASSPPS   |
| Q93WP8 | 49  | PSPASSPPSKEVS   |
| Q93WP8 | 50  | SPASSPPSKEVSN   |
| Q93WP8 | 150 | NRKPLSPSPKPA    |
| Q93WP8 | 151 | RKPLSPSPKPAD    |
| P14618 | 403 | ELRR LAPITSDPT  |
| P14618 | 408 | APITSDPTEATAV   |
| Q9BPB1 | 58  | WQYCESPTDCCSW   |
| Q9BPB2 | 49  | QQKRLCPDYTDPC   |

---

---

|        |      |                |
|--------|------|----------------|
| Q9BPB2 | 54   | CPDYTDPCSHAHE  |
| P02820 | 60   | DHWLGAPAPYPDP  |
| P80760 | 11   | PPVEKPPVYKPPV  |
| P0C7W7 | 6    | XXIIIGAPCRRCYH |
| P52285 | 143  | IKNDFTEEEEEQI  |
| Q0VKG8 | 56   | ERRDRPSPWIPKX  |
| Q9M0S4 | 24   | SAIAQAPGPAPTR  |
| Q9M0S4 | 26   | IAQAPGPAPTRSP  |
| Q9M0S4 | 28   | QAPGPAPTRSPLP  |
| Q9M0S4 | 32   | PAPTRSPLPSPAQ  |
| Q9M0S4 | 36   | RSPLPSPAQPPRT  |
| Q9LJD9 | 32   | AAQTEAPAPSPTS  |
| Q9LJD9 | 34   | QTEAPAPSPTSDA  |
| Q9LJD9 | 36   | EAPAPSPTSDAAM  |
| Q9SJY7 | 34   | PTTVTPPTALPP   |
| Q9SJY7 | 35   | TTVTTPPTALPPV  |
| Q9ZT16 | 32   | PTPTATPPPATPP  |
| Q9ZT16 | 33   | TPTATPPPATPPP  |
| Q9ZT16 | 37   | TPPPATPPPVATP  |
| Q8LG54 | 26   | LAQAPAPSPTTTV  |
| Q8LG54 | 28   | QAPAPSPTTTVTP  |
| Q9C5S0 | 26   | GQAPTSPTATPA   |
| Q9C5S0 | 27   | QAPTSPTATPAP   |
| Q9C5S0 | 33   | PTATPAPPTPTTP  |
| P83184 | 5    | XXYAEVPSPAQA   |
| P83184 | 7    | YAEVPSPAAQAPT  |
| P02745 | 57   | QGEPGAIGIRTGI  |
| P02747 | 36   | TGCYGI PGMPGLP |
| P02747 | 63   | KGEPGI PAIPGIR |
| P58782 | 21   | GCKVGRPPYCDRP  |
| P58782 | 22   | CKVGRPPYCDRPS  |
| P0C8W0 | 53   | EKRGCDPTDGCQT  |
| P0C8W0 | 68   | CETDTGPCCCKPN  |
| P0C8W0 | 93   | CSCSGQPSDCPVX  |
| Q7Z094 | 11   | CKADEKPCEYHAD  |
| Q7Z094 | 29   | LSGICAPSTNWIL  |
| Q7Z096 | 38   | RVKNRGPSFCKAD  |
| Q9U3Z3 | 53   | WGGCGHPCRHPGK  |
| P58842 | 11   | HCWVCI PCCPNXX |
| P60245 | 14   | GSCRPFPGCYNAL  |
| P0CG45 | 7    | LPPCCTPPKKHCP  |
| P0CG45 | 8    | PPCCTPPKKHCPA  |
| P0CG45 | 13   | PPKKHCPAPACKY  |
| P0CG45 | 15   | KKHCPAPACKYKP  |
| P0CG45 | 21   | PACKYKPCCKSXX  |
| P28880 | 55   | CRSSGSPCGVTSI  |
| P56633 | 49   | STRCRI PNQKCFQ |
| P0C2W8 | 292  | AKGEPGPIGIQGP  |
| P85154 | 410  | AGARGE PGNIGFP |
| P85154 | 704  | RGDGGP PGATGFP |
| P85154 | 731  | TGPPGP PGAAGKE |
| P12111 | 2206 | FGRRGP PGAAGNK |
| P60513 | 6    | XDDCIKPYGFCSL  |
| P58914 | 7    | CKPPGS PCRVSSY |
| P0CH18 | 6    | XFGSFI PCAHKGE |
| P0CH18 | 13   | CAHKGE PCTICCR |
| P0CH18 | 20   | CTICCRPLRCHEE  |
| P0CH20 | 5    | XXYGNFPTCSETG  |
| P58916 | 7    | CKGKGA PCTRLMY |

---

|        |     |                                 |
|--------|-----|---------------------------------|
| P23805 | 147 | KGGVGA <b>P</b> GIQGFP          |
| P29602 | 115 | NATVSM <b>P</b> PPSSSP          |
| P29602 | 116 | ATVSM <b>P</b> PPSSSP           |
| P29602 | 117 | TVSM <b>P</b> PPSSSP            |
| P29602 | 121 | PPSS <b>P</b> PPSSVMP           |
| P29602 | 122 | PPSS <b>P</b> PPSSVMP           |
| P29602 | 128 | PSSV <b>P</b> PPVMPPP           |
| P29602 | 129 | SSVM <b>P</b> PPVMPPP           |
| P29602 | 132 | MPP <b>P</b> VMPPSPSX           |
| P29602 | 133 | PP <b>P</b> VMPPSPSXX           |
| Q25460 | 89  | PTYK <b>P</b> KPSYPPTY          |
| Q25460 | 92  | KPK <b>P</b> SYPTYKSK           |
| Q25460 | 93  | PK <b>P</b> SYPTYKSKP           |
| Q25460 | 867 | AKTS <b>P</b> YPAYKPTN          |
| P85065 | 14  | TPGCT <b>P</b> GGGSNC           |
| Q941C7 | 63  | KHDPGV <b>P</b> PSATGQ          |
| Q941C7 | 64  | HDPGV <b>P</b> PSATGQR          |
| P00877 | 104 | IAYVAY <b>P</b> IDLFEE          |
| P00877 | 151 | VKT <b>F</b> VG <b>P</b> PHGIQV |
| P08427 | 30  | DVCAG <b>S</b> PGIPGAP          |
| P08427 | 63  | PGPM <b>G</b> PPGMPGL           |
| P08427 | 67  | GPP <b>G</b> MPGLPGRD           |

## Negative dataset

| Uniprot ID | Position | Fragments               |
|------------|----------|-------------------------|
| Q3Y5Z3     | 14       | LLLLAL <b>P</b> SHGEDN  |
| Q3Y5Z3     | 24       | EDNMED <b>P</b> PLPKGA  |
| Q3Y5Z3     | 25       | DNMED <b>P</b> PLPKGAC  |
| Q3Y5Z3     | 27       | MED <b>P</b> PLPKGACAG  |
| Q3Y5Z3     | 57       | DGRDGT <b>P</b> GEGKEK  |
| Q3Y5Z3     | 66       | KGEKGD <b>P</b> GLVGPK  |
| Q3Y5Z3     | 71       | DPGLVG <b>P</b> KGDTGE  |
| Q3Y5Z3     | 90       | EGPRGF <b>P</b> GTPGRK  |
| Q3Y5Z3     | 99       | PGRKGE <b>P</b> GESAYV  |
| Q3Y5Z3     | 121      | ERQVT <b>V</b> PNVPIRF  |
| Q3Y5Z3     | 124      | VTVP <b>N</b> PIRFTKI   |
| Q3Y5Z3     | 150      | KFLC <b>N</b> IGLYYFS   |
| Q15848     | 25       | ETTTQ <b>G</b> PGVLLPL  |
| Q60994     | 29       | TTEEL <b>A</b> PALVPPP  |
| Q60994     | 33       | LAPAL <b>V</b> PPPKGTC  |
| Q60994     | 34       | APAL <b>V</b> PPKGTC    |
| Q60994     | 47       | GWMAG <b>I</b> PGHPGHN  |
| Q60994     | 50       | AGIP <b>G</b> HNGTP     |
| Q60994     | 56       | PGHNGT <b>P</b> GRDGRD  |
| P07550     | 4        | XXXMG <b>Q</b> PGNGSAF  |
| P07550     | 14       | SAFLL <b>A</b> PNGSHAP  |
| P07550     | 20       | PNGSH <b>A</b> PDHDVTQ  |
| P07550     | 88       | MGLAV <b>V</b> PFGAAHI  |
| P07550     | 138      | YFAIT <b>S</b> PFKYQSL  |
| P07550     | 168      | GLTS <b>F</b> LPIQMHY   |
| P07550     | 211      | IVSFY <b>V</b> PLVIMVF  |
| P07550     | 288      | FTLCW <b>L</b> PPFFIVNI |
| P07550     | 323      | VNSGF <b>N</b> PLIYCRS  |
| P07550     | 330      | LIYCR <b>S</b> PDFRIAF  |
| Q9UKV8     | 7        | MYSGAG <b>A</b> PALAPPA |
| Q9UKV8     | 11       | AGPAL <b>A</b> PAPPPP   |
| Q9UKV8     | 12       | GPAL <b>A</b> PAPPPPI   |
| Q9UKV8     | 14       | ALAPP <b>A</b> PPPIQG   |

---

|        |     |                |
|--------|-----|----------------|
| Q9UKV8 | 15  | LAPPAPPPPIQGY  |
| Q9UKV8 | 16  | APPAPPPIQGYA   |
| Q9UKV8 | 17  | PPAPPPPIQGYAF  |
| Q9UKV8 | 25  | QGYAFKPPRPDF   |
| Q9UKV8 | 26  | GYAFKPPRPDFG   |
| Q9UKV8 | 27  | YAFKPPRPDFGT   |
| Q9UKV8 | 29  | FKPPRPDPFGTSG  |
| Q9UKV8 | 50  | FFEMDI PKIDIYH |
| Q9UKV8 | 63  | YELDIKPEKCPRR  |
| Q9UKV8 | 67  | IKPEKCPRRVNRE  |
| Q9UKV8 | 92  | IFGDRKPVFDGRK  |
| Q9UKV8 | 105 | NLYTAMPLPIGRD  |
| Q9UKV8 | 107 | YTAMPLPIGRDKV  |
| Q9UKV8 | 120 | ELEVTLPGEGKDR  |
| Q9UKV8 | 152 | ALSGRLPSVPFET  |
| Q9UKV8 | 155 | GRLPSVPFETIQA  |
| Q9UKV8 | 170 | VVMRHLPSMRYTP  |
| Q9UKV8 | 176 | PSMRYTPVGRSFF  |
| Q9UKV8 | 191 | SEGCSNPLGGGRE  |
| Q9UKV8 | 208 | FHQSVRPSLWKMM  |
| Q9UKV8 | 229 | AFYKAQPVIEFVC  |
| Q9UKV8 | 249 | IEEQKPLTDSQR   |
| Q9UKV8 | 288 | CNVTRRPASHQTF  |
| Q9UKV8 | 295 | ASHQTFPLQQESG  |
| Q9UKV8 | 323 | KLVLRYPHLPCLQ  |
| Q9UKV8 | 326 | LRYPHLPCLQVGQ  |
| Q9UKV8 | 340 | QKHTYLPLEVCNI  |
| Q9UKV8 | 373 | ATARSAPDRQEEI  |
| Q9UKV8 | 392 | ASFNTDPYVREFG  |
| Q9UKV8 | 415 | TGRVLQPPSILYG  |
| Q9UKV8 | 416 | GRVLQPPSILYGG  |
| Q9UKV8 | 430 | NKAIATPVQGVWD  |
| Q9UKV8 | 458 | AIACFAPQRQCTE  |
| Q9UKV8 | 484 | SRDAGMPIQGQPC  |
| Q9UKV8 | 489 | MPIQGQPCFCKYA  |
| Q9UKV8 | 503 | GADSVPMFRHLK   |
| Q9UKV8 | 523 | LVVVILPGKTPVY  |
| Q9UKV8 | 527 | ILPGKTPVYAEVK  |
| Q9UKV8 | 557 | NVQRTTPQTLNL   |
| Q9UKV8 | 580 | VNNILLQGRPPV   |
| Q9UKV8 | 584 | LLPQGRPPVFQQP  |
| Q9UKV8 | 585 | LPQGRPPVFQQPV  |
| Q9UKV8 | 590 | PPVFQQPVIFLGA  |
| Q9UKV8 | 601 | GADVTHPPAGDGK  |
| Q9UKV8 | 602 | ADVTHPPAGDGKK  |
| Q9UKV8 | 609 | AGDGKKPSIAAVV  |
| Q9UKV8 | 622 | GSMDAHPNRYCAT  |
| Q9UKV8 | 661 | KSTRFKPTRIIFY  |
| Q9UKV8 | 731 | GKSGNIPAGTTVD  |
| Q9UKV8 | 743 | DTKITHPTEFDFY  |
| Q9UKV8 | 762 | IQGTSRPSHYHVL  |
| Q9UKV8 | 800 | TRSVSIPAPAYYA  |
| Q9UKV8 | 802 | SVSIPAPAYY AHL |
| P84895 | 2   | XXXXXRPPGFSPF  |
| Q0VTT8 | 50  | EKKRFEPVPPGFT  |
| Q0VTT8 | 53  | RFEPVP PGFTPFR |
| Q0VTT8 | 57  | VPPGFTPFRQTX   |
| P84900 | 50  | EKKRES PDRPPGF |
| Q4ZJN1 | 108 | PKGSIGPTGEQGL  |

---



---

|        |     |                                                  |
|--------|-----|--------------------------------------------------|
| Q4ZJN1 | 120 | LPGETG <b>P</b> QGQKGD                           |
| Q4ZJN1 | 135 | EVGPTG <b>P</b> EGLMGS                           |
| Q4ZJN1 | 197 | GKVGEA <b>P</b> LVPKSA                           |
| Q4ZJN1 | 200 | GEA <b>P</b> LVPKSAFTV                           |
| Q4ZJN1 | 215 | TVISK <b>F</b> PPDAP <b>I</b>                    |
| Q4ZJN1 | 216 | VISK <b>F</b> PPDAP <b>I</b> K                   |
| Q4ZJN1 | 217 | ISK <b>F</b> PPDAP <b>I</b> K <b>F</b>           |
| Q4ZJN1 | 220 | F <b>P</b> PPDAP <b>I</b> KFDK <b>I</b>          |
| P58843 | 14  | G <b>F</b> TCCL <b>P</b> NYCQGL                  |
| P50982 | 51  | DPCCY <b>H</b> PTCNMS <b>N</b>                   |
| P50982 | 58  | TCNMS <b>N</b> PQICG <b>X</b> X                  |
| P85886 | 62  | TCRMEY <b>P</b> ELCGGR                           |
| P0C351 | 9   | PGCCW <b>N</b> PACV <b>K</b> NR                  |
| P0C1X1 | 23  | TTVV <b>S</b> I <b>P</b> SDRAS <b>D</b>          |
| P0C1W8 | 10  | VPNAAC <b>P</b> PCVC <b>N</b> K                  |
| P30754 | 5   | XXYRAG <b>P</b> RY <b>I</b> QA <b>Q</b>          |
| P30754 | 14  | IQAQV <b>G</b> <b>P</b> IGPR <b>G</b> P          |
| P30754 | 23  | PRGPP <b>G</b> <b>P</b> PGSP <b>G</b> Q          |
| P30754 | 44  | EPGDS <b>G</b> <b>P</b> MGPI <b>G</b> K          |
| P30754 | 74  | RDGE <b>P</b> <b>G</b> PRGG <b>I</b> GP          |
| P30754 | 83  | GIG <b>P</b> MG <b>P</b> RGAG <b>G</b> M         |
| P30754 | 200 | AQGLQ <b>G</b> <b>P</b> VGL <b>S</b> G <b>Q</b>  |
| P30754 | 452 | ETGAAG <b>P</b> PGAAG <b>P</b>                   |
| P30754 | 581 | SRGDIG <b>P</b> RGKAGE                           |
| P30754 | 998 | PSGRV <b>G</b> <b>P</b> RGPS <b>G</b> D          |
| Q24940 | 100 | ILSHGV <b>P</b> YEAN <b>N</b> R                  |
| Q24940 | 166 | LVDCS <b>G</b> <b>P</b> WG <b>N</b> NGC          |
| Q24940 | 238 | LVGARR <b>P</b> AAVA <b>D</b>                    |
| Q24940 | 264 | QSQTCS <b>P</b> L <b>R</b> V <b>N</b> HA         |
| Q24940 | 320 | ASLAS <b>L</b> <b>P</b> MVAR <b>F</b> P          |
| P0C8S5 | 9   | GIYDAK <b>P</b> PFSCAG                           |
| P0C8S5 | 23  | RGGCV <b>L</b> <b>P</b> PNLR <b>P</b> K          |
| C3VVN6 | 2   | XXXXX <b>M</b> <b>P</b> KLAV <b>V</b> L          |
| C3VVN6 | 15  | LVLLIL <b>P</b> LSY <b>F</b> DA                  |
| P0C1W6 | 75  | CGSMCC <b>P</b> RNGCTC                           |
| P15472 | 24  | RCGRGN <b>P</b> QKC <b>I</b> GA                  |
| P08252 | 36  | AGGAR <b>C</b> <b>P</b> SG <b>L</b> CCS          |
| P08252 | 56  | TNDYCG <b>P</b> GNCQ <b>S</b> Q                  |
| P08252 | 64  | NCQS <b>Q</b> <b>C</b> <b>P</b> GGPT <b>P</b> T  |
| P08252 | 120 | NAARS <b>F</b> <b>P</b> GF <b>G</b> T <b>S</b> G |
| P08252 | 154 | GGWATA <b>P</b> DGPY <b>A</b> W                  |
| P08252 | 157 | ATAPDG <b>P</b> YAW <b>G</b> YC                  |
| P08252 | 171 | LREQGS <b>P</b> GDY <b>C</b> TP                  |
| P08252 | 177 | PGDYCT <b>P</b> SGQW <b>P</b> C                  |
| P08252 | 182 | TPSGQW <b>P</b> CAP <b>G</b> RK                  |
| P08252 | 185 | GQW <b>P</b> CAP <b>G</b> RKY <b>F</b> G         |
| P08252 | 194 | KYFGR <b>G</b> <b>P</b> IQ <b>I</b> SH <b>N</b>  |
| P08252 | 205 | HNYNY <b>G</b> <b>P</b> CGRA <b>I</b> G          |
| P08252 | 218 | VDLLNN <b>P</b> DLVAT <b>D</b>                   |
| P08252 | 225 | DLVATD <b>P</b> VIS <b>F</b> KS                  |
| P08252 | 239 | LWFWMT <b>P</b> QSP <b>K</b> PS                  |
| P08252 | 242 | WMTP <b>Q</b> <b>S</b> <b>P</b> KPS <b>C</b> HD  |
| P08252 | 244 | TPQSP <b>K</b> <b>P</b> S <b>C</b> HD <b>V</b> I |
| P08252 | 256 | IIGRW <b>Q</b> <b>P</b> SAG <b>D</b> RA          |
| P08252 | 267 | RAANRL <b>P</b> GF <b>G</b> V <b>I</b> T         |
| P08252 | 308 | SILGV <b>S</b> <b>P</b> GD <b>N</b> L <b>D</b> C |
| P24091 | 70  | PGGPT <b>P</b> <b>P</b> GGGD <b>L</b> G          |
| Q9BPJ7 | 16  | ICLL <b>L</b> <b>F</b> <b>P</b> LTA <b>V</b> PM  |
| Q9BPJ7 | 21  | FPLTA <b>V</b> <b>P</b> MDGD <b>Q</b> P          |

---



---

|        |      |                |
|--------|------|----------------|
| Q9BPJ7 | 27   | PMDGDQPADRPAE  |
| Q9BPJ7 | 31   | DQPADRPAERMQD  |
| Q9BPJ7 | 45   | ISFEQHMFDAATR  |
| Q2I2Q5 | 16   | TFLVLFLTLLEL   |
| Q2I2Q5 | 27   | ELDTDRPVERHAA  |
| Q2I2Q5 | 40   | IKQDLKPQERRGI  |
| Q2I2Q5 | 51   | GIRLHAPRDECCE  |
| P58925 | 45   | ISSEEHPEKRRQR  |
| P0C424 | 4    | XXXCCAPSACRLG  |
| P58846 | 45   | ISFENNPFYDPAK  |
| P58846 | 49   | NNPFYDPAKRCCR  |
| P0C1N5 | 57   | RDCCPLPACPFGC  |
| P0C1N5 | 60   | CPLPACPFGCNPC  |
| P85017 | 6    | XKCCMRPICTCPC  |
| P0C8V5 | 34   | GLKDLFPKARHEM  |
| P0C8V5 | 43   | RHEMKNPEASKLN  |
| P0C8V6 | 56   | KRDECYPGTFCEG  |
| P0C8V6 | 75   | CSERCFPFVCLSL  |
| D5KR58 | 28   | ADDMEYPKWLRLG  |
| P86289 | 72   | AGPSGPPGPTGAR  |
| P02457 | 48   | DKDVWKPEPCQIC  |
| P02457 | 50   | DVWKPEPCQICVC  |
| P02457 | 75   | EDTSDCPNAEIPF  |
| P02457 | 80   | CPNAEI PFGECCP |
| P02457 | 86   | PFGECCPICPDVD  |
| P02457 | 89   | ECCPICPDVDASP  |
| P02457 | 95   | PDVDASPVYPESA  |
| P02457 | 98   | DASPVYPESAGVE  |
| P02457 | 151  | LGGNFAPQMSYGY  |
| P02457 | 167  | SAGVAVPGPMGPA  |
| P02457 | 227  | DGEAGKPGRPGQR  |
| P02457 | 271  | AKGQPGPAGPKGE  |
| P02457 | 938  | IGAPGTPGPQGIA  |
| P02457 | 1191 | FDLSFLQPPQEK   |
| P02457 | 1193 | LSFLPQPPQEKAH  |
| P02457 | 1194 | SFLPQPPQEKAMD  |
| P02457 | 1237 | IENIRSPEGTRKN  |
| P02457 | 1244 | EGTRKNPARTCRD  |
| P02457 | 1267 | GEYWIDPNQGCNL  |
| P02457 | 1291 | GETCVYPTQATIA  |
| P02457 | 1307 | WYLSKNPKEKKHV  |
| P02457 | 1334 | GGECSNPADVAIQ  |
| P02457 | 1427 | TKTSRLPIIDLAP  |
| P02457 | 1433 | PIIDLAPMDVGAP  |
| P02457 | 1439 | PMDVGAPDQEFGI  |
| P02457 | 1449 | FGIDIGPVCFLXX  |
| P0C2W2 | 296  | VQGPPGPQGPRXX  |
| P02467 | 81   | FAAQYDPSKAADF  |
| P02467 | 89   | KAADFPGPMGLM   |
| P02467 | 313  | KGAAGLPGVAGAP  |
| P02467 | 417  | RAGVMGPAGNRGA  |
| P02467 | 469  | XXXXGFPADGRV   |
| P02467 | 493  | PGNIGFPGPKGPT  |
| P02467 | 874  | PGILGLPGSRGER  |
| P02467 | 933  | NPGNDGPPGRDGA  |
| P02467 | 1042 | HGDQGP PGNNGPA |
| P02467 | 1120 | YYRADQPSLRPKD  |
| P02467 | 1124 | DQPSLRPKDYEVD  |
| P02467 | 1165 | DLRLSHPEWSSGF  |

---

---

|        |      |         |          |
|--------|------|---------|----------|
| P02467 | 1206 | ASLEDIP | TKTWYV   |
| P02467 | 1332 | EYRTNK  | PSRLPIL  |
| P56711 | 38   | FLSKRK  | PSAERWR  |
| P05539 | 7    | MIRLGAP | QSLVLL   |
| P05539 | 40   | KGQKGE  | PGDIKDI  |
| P05539 | 134  | MGVMQG  | PMGPMGP  |
| P05539 | 162  | QGNPGE  | PGEPGVS  |
| P05539 | 498  | RGLTGR  | PGDAGPQ  |
| P05539 | 642  | PGERGS  | PGAQGLQ  |
| P05539 | 1148 | PPGPPG  | PGIDMSA  |
| P05539 | 1165 | GQREKG  | PDPLQYM  |
| P05539 | 1167 | REKGPD  | PLQYMRA  |
| P05539 | 1260 | SCVYPN  | PATVPRK  |
| P05539 | 1264 | PNPATV  | PRKNWWS  |
| P05539 | 1300 | GDGNLA  | PNTANVQ  |
| P05997 | 10   | NWAEAR  | PLILILIV |
| P05997 | 85   | VLDCAD  | PVTPPGE  |
| P05997 | 89   | ADPVT   | PPGECPPV |
| P05997 | 100  | PVCSQT  | PGGGNTN  |
| P05997 | 122  | GEPGLV  | PVVTGIR  |
| P05997 | 184  | HPSHPG  | PDGLSRP  |
| P05997 | 190  | PDGLSR  | PFSAQMA  |
| P05997 | 212  | SQVGLM  | PGSVGPV  |
| P05997 | 505  | EEGKR   | GPRGDPGT |
| P05997 | 1245 | HYDESM  | PDPLPEF  |
| P05997 | 1247 | DESMPD  | PLPEFTE  |
| P05997 | 1249 | SMPDPL  | PEFTEDQ  |
| P05997 | 1258 | TEDQA   | APDDKNKT |
| P05997 | 1266 | DKNKTD  | PGVHATL  |
| P05997 | 1355 | WWASKS  | PDNKPVW  |
| P05997 | 1359 | KSPDNK  | PVWYGLD  |
| P05997 | 1380 | YGDHQS  | PNTAITQ  |
| P12108 | 6    | XMAHRS  | PALCLLL  |
| P12108 | 26   | LAQLRG  | PPGEPGP  |
| P12108 | 113  | PPGLPG  | PSLPGPP  |
| P12108 | 116  | LPGPSL  | PGPPGLP  |
| P12108 | 119  | PSLPGP  | PGLPGQV  |
| P12108 | 173  | SADFLC  | PTNCPPG  |
| P12108 | 177  | LCPTNC  | PPGPKGP  |
| P12108 | 180  | TNCPPG  | PKGPQGL  |
| P12108 | 612  | DTGRGH  | PGMPGPP  |
| P12108 | 627  | PGLPGI  | PGHALAG  |
| P12108 | 659  | PGPAGL  | PGFCEPA  |
| P12108 | 664  | LPGFCE  | PAACLGA  |
| P12108 | 672  | ACLGAL  | PTPRHGX  |
| A6YR20 | 15   | VLLLLL  | PYGDLIT  |
| A6YR20 | 34   | AARKVT  | PWRRNLK  |
| Q05707 | 14   | MRYWLL  | PPFLAIV  |
| Q05707 | 15   | RYWLLP  | PFLAIVY  |
| Q05707 | 32   | VQGQVA  | PPTRLRY  |
| Q05707 | 33   | QGQVAP  | PTRLRYN  |
| Q05707 | 53   | QISWKA  | PRGKFGG  |
| Q05707 | 66   | YKLLVT  | PTSGGKT  |
| Q05707 | 91   | IIQGLM  | PDQNYTV  |
| Q05707 | 110  | KDKESK  | PAQGQFR  |
| Q05707 | 126  | LEKRKD  | PKPRVKV  |
| Q05707 | 128  | KRKDPK  | PRVKVVD  |
| Q05707 | 141  | RGNGSR  | PSSPEEV  |
| Q05707 | 144  | GSRPSS  | PEEVKFV  |

---

---

|        |      |                                                  |
|--------|------|--------------------------------------------------|
| Q05707 | 154  | KFVCQT <b>P</b> AIADIV                           |
| Q05707 | 206  | AQYSGD <b>P</b> RIEWHL                           |
| Q05707 | 229  | EAVRN <b>L</b> PYKGGNT                           |
| Q05707 | 251  | FENSFK <b>P</b> EAGSRT                           |
| Q05707 | 277  | SQDDI <b>I</b> PPSRNLR                           |
| Q05707 | 278  | QDDI <b>I</b> PPSRNLR                            |
| Q05707 | 309  | QEIAS <b>E</b> PDSTHVY                           |
| Q05707 | 355  | AHAITG <b>P</b> PTELIT                           |
| Q05707 | 356  | HAITG <b>P</b> PTELITS                           |
| Q05707 | 377  | VNWT <b>H</b> APGNVEKY                           |
| Q05707 | 389  | YRVV <b>Y</b> YPTRGGKP                           |
| Q05707 | 395  | PTRGGK <b>P</b> DEVVVD                           |
| Q05707 | 444  | ETTL <b>A</b> LPMASDLL                           |
| Q05707 | 467  | VKWD <b>A</b> VPGASGYL                           |
| Q05707 | 478  | YLIL <b>Y</b> AP <b>L</b> TEGLA                  |
| Q05707 | 506  | ELSG <b>L</b> LPNTEYTV                           |
| Q05707 | 525  | GEEAS <b>D</b> PVTGQET                           |
| Q05707 | 537  | TTL <b>A</b> LS <b>P</b> PRNLR                   |
| Q05707 | 538  | TL <b>A</b> LS <b>P</b> PRNLRIS                  |
| Q05707 | 557  | ARLT <b>W</b> DP <b>T</b> SRQIN                  |
| Q05707 | 584  | NEVE <b>V</b> DPITTFPL                           |
| Q05707 | 589  | DPIT <b>T</b> FP <b>L</b> KGLTP                  |
| Q05707 | 614  | DEGQ <b>S</b> E <b>L</b> TGVFT                   |
| Q05707 | 625  | FTTE <b>E</b> V <b>P</b> AQQYLE                  |
| Q05707 | 646  | FRVT <b>W</b> H <b>P</b> LSADEC                  |
| Q05707 | 720  | DSFW <b>T</b> E <b>P</b> ATTIVP                  |
| Q05707 | 726  | PATTI <b>V</b> PTTSVTS                           |
| Q05707 | 776  | MTAQ <b>G</b> D <b>P</b> EEEVIG                  |
| Q05707 | 787  | IGTV <b>M</b> V <b>P</b> GSQNNL                  |
| Q05707 | 797  | NNLL <b>L</b> L <b>K</b> PLLPDTE                 |
| Q05707 | 810  | YKV <b>T</b> VT <b>P</b> IYTDGE                  |
| Q05707 | 823  | GVSV <b>S</b> AP <b>G</b> KTLPS                  |
| Q05707 | 828  | APG <b>K</b> TL <b>P</b> SSGPQN                  |
| Q05707 | 851  | LRIT <b>W</b> DP <b>P</b> SSPVK                  |
| Q05707 | 852  | RIT <b>W</b> DP <b>P</b> SSPVKG                  |
| Q05707 | 855  | WD <b>P</b> PSS <b>P</b> VKGYRI                  |
| Q05707 | 865  | YRIV <b>Y</b> K <b>P</b> VSVPGP                  |
| Q05707 | 869  | YKP <b>V</b> SV <b>P</b> GP <b>T</b> LET         |
| Q05707 | 871  | PVS <b>V</b> PG <b>P</b> TLET <b>F</b> V         |
| Q05707 | 979  | CFY <b>G</b> LQ <b>P</b> DSEYKI                  |
| Q05707 | 997  | LQE <b>I</b> EG <b>P</b> SVSIME                  |
| Q05707 | 1012 | QSL <b>P</b> TR <b>P</b> PT <b>F</b> PPT         |
| Q05707 | 1013 | SL <b>P</b> TR <b>P</b> PT <b>F</b> PPT <b>I</b> |
| Q05707 | 1020 | TF <b>P</b> P <b>T</b> I <b>P</b> PAKEVC         |
| Q05707 | 1021 | FP <b>P</b> T <b>I</b> P <b>P</b> AKEVCK         |
| Q05707 | 1081 | VQ <b>F</b> TDD <b>P</b> RTEFKL                  |
| Q05707 | 1135 | GTR <b>R</b> GI <b>P</b> KVIVVI                  |
| Q05707 | 1184 | VSIG <b>S</b> K <b>P</b> SARHVF                  |
| Q05707 | 1218 | TAS <b>A</b> TC <b>P</b> VVHKDG                  |
| Q05707 | 1253 | EGV <b>S</b> ME <b>P</b> GTFNVF                  |
| Q05707 | 1260 | GTF <b>N</b> V <b>F</b> PCYQLHK                  |
| Q05707 | 1273 | DAL <b>V</b> SQ <b>P</b> TRYLHP                  |
| Q05707 | 1279 | PTRY <b>L</b> H <b>P</b> EGLPSD                  |
| Q05707 | 1283 | LH <b>P</b> EGL <b>P</b> SDYTIS                  |
| Q05707 | 1296 | FL <b>F</b> RI <b>L</b> PD <b>T</b> PQEP         |
| Q05707 | 1299 | RIL <b>P</b> DT <b>P</b> QEPFAL                  |
| Q05707 | 1302 | PD <b>T</b> PQ <b>E</b> PFALWEI                  |
| Q05707 | 1315 | LNK <b>N</b> SD <b>P</b> LVGVIL                  |
| Q05707 | 1347 | TVTF <b>E</b> G <b>P</b> EIRKIF                  |

---

---

|        |      |                |
|--------|------|----------------|
| Q05707 | 1406 | MVRSRGPGGNSAP  |
| Q05707 | 1436 | DKCCELPGLRDDE  |
| Q05707 | 1445 | RDDESCPDLPHSC  |
| Q05707 | 1448 | ESCPDLPHSCSCS  |
| Q05707 | 1463 | NEVALGPAGPPGG  |
| Q05707 | 1761 | QPGYCDPSSCSAY  |
| Q05707 | 1772 | AYGVRAPHDPQPE  |
| Q05707 | 1774 | GVRAPHDPQPEFT  |
| Q05707 | 1777 | APHPDQPEFTPVQ  |
| Q05707 | 1781 | DQPEFTPVQDELE  |
| B2KPN7 | 62   | WEYHAHPKPNSEFW |
| Q6PSU2 | 44   | ERANLRPCEQHLM  |
| Q6PSU2 | 64   | DSYGRDPYSPSQD  |
| Q6PSU2 | 78   | YSPSQDPDRRDPY  |
| Q6PSU2 | 88   | DPYSPSPYDRRGA  |
| Q6PSU2 | 149  | RELRLNPQQCGLR  |
| Q6PSU2 | 157  | QCGLRAPQRCDLE  |
| P58786 | 35   | ADRNAVPRDDNPG  |
| P58786 | 40   | VPRDDNPGGASGK  |
| P86256 | 2    | XXXXXDPCCGYRM  |
| P58808 | 5    | XXMRCLPVLIIIL  |
| P58808 | 18   | LLTASAPGVVVL   |
| P58808 | 24   | PGVVVLPKTEDDV  |
| P58808 | 31   | KTEDDVPMSSVYG  |
| P81755 | 18   | LLIASAPCFDART  |
| P69765 | 23   | KAKDNMPLASFHD  |
| P69765 | 46   | INTRCCPGKPCR   |
| B2CS62 | 27   | KLIRTRPLMYHVC  |
| D2Y171 | 69   | APCCQHPJETCCR  |
| D2Y168 | 23   | IETEAGPVNEAGV  |
| D2Y168 | 42   | LVGRGCPADCPNT  |
| D2Y168 | 46   | GCPADCNTCDSS   |
| P80762 | 5    | XXNMYLPPVPPPP  |
| P80774 | 4    | XXXQNQPPDFANP  |
| P80774 | 5    | XXQNQPPDFANPF  |
| P80774 | 14   | ANPFIIPQNAAXX  |
| P86500 | 5    | XXFELLPSQDRSC  |
| P86500 | 52   | YYFGCCPGYATCM  |
| C4PWC4 | 70   | LNRVCGPMCCPAS  |
| P0CE29 | 40   | NGLARYPQRGGRD  |
| B4YSU8 | 16   | ALLLLLPLSTAQD  |
| B4YSU8 | 69   | VNSRCCPTTDGCX  |
| P00057 | 7    | ASFBZAPGBVKA   |
| P00057 | 8    | SFBZAPGBVKAG   |
| P00057 | 38   | AGHKQGNLNLGLF  |
| P00057 | 84   | NPKKYIPGTKMVF  |
| P00057 | 91   | GTKMVFPGCLKKPQ |
| P00057 | 96   | FPGLKKPQDRADL  |
| P15502 | 11   | TAAAPRPGVLLLL  |
| P15502 | 23   | LLSILHPSRPGGV  |
| P15502 | 26   | ILHPSRPGGVPGA  |
| P15502 | 30   | SRPGGVPGAIPGG  |
| P15502 | 38   | AIPGGVPGGVFYP  |
| P15502 | 44   | PGGVFYPGAGLGA  |
| P15502 | 58   | GGGALGPGGKPLK  |
| P15502 | 62   | LGPGGKPLKPVPG  |
| P15502 | 65   | GGKPLKVPVGGLA  |
| P15502 | 67   | KPLKVPVGGLAGA  |
| P15502 | 83   | AGLGAFPAVTFPG  |

---

---

|        |     |               |
|--------|-----|---------------|
| P15502 | 88  | FPAVTFPGALVPG |
| P15502 | 130 | SAGAVVPQPGAGV |
| P15502 | 132 | GAVVPQPGAGVKP |
| P15502 | 138 | PGAGVKPGKVPGV |
| P15502 | 142 | VKPGKVPGVGLPG |
| P15502 | 147 | VPGVGLPGVYPGG |
| P15502 | 156 | YPGGVLPGARFPG |
| P15502 | 170 | GVLPGVPTGAGVK |
| P15502 | 177 | TGAGVKPKAPGVG |
| P15502 | 180 | GVKPKAPGVGGAF |
| P15502 | 194 | GIPGVGPFGGPQP |
| P15502 | 198 | VGPFGGPQPGVPL |
| P15502 | 200 | PFGGPQPGVPLGY |
| P15502 | 207 | GVPLGYPIKAPKL |
| P15502 | 211 | GYPIKAPKLPGGY |
| P15502 | 220 | PGGYGLPYTTGKL |
| P15502 | 227 | YTTGKLPGYGP   |
| P15502 | 245 | AGKAGYPTGTGVG |
| P15502 | 252 | TGTGVGPQAAAAA |
| P15502 | 290 | GVPGAIPGIGGIA |
| P15502 | 301 | IAGVGTAAAAAA  |
| P15502 | 324 | AAAGLVPGPGFG  |
| P15502 | 331 | GGPGFGPGVGVVP |
| P15502 | 355 | AGIPVVPAGVIPG |
| P15502 | 365 | IPGAAVPGVVSPE |
| P15502 | 395 | VGVGGIPTYGVGA |
| P15502 | 433 | PGVGGVPGVGISP |
| P15502 | 465 | VLGGLVPGPQAAV |
| P15502 | 467 | GGLVPGPQAAVPG |
| P15502 | 550 | VAPGIGPGVAAA  |
| P15502 | 598 | GVGAGVPGLGVGA |
| P15502 | 623 | VRRSLSPELREGD |
| P15502 | 630 | ELREGDPSSSQHL |
| P15502 | 637 | SSSQHLSTPSSP  |
| P15502 | 640 | QHLPSTPSSPRVP |
| P15502 | 643 | PSTPSSPRVPGAL |
| P15502 | 646 | PSSPRVPGALAAA |
| P15502 | 755 | GGAGQFPLGGVAA |
| P15502 | 769 | PGFGLSPIFPGGA |
| P15502 | 772 | GLSPIFPGGACLG |
| A1X158 | 24  | ASAVYHPPSWTAW |
| A1X158 | 25  | SAVYHPPSWTAWI |
| A1X158 | 33  | WTAWIAPKPWTAW |
| A1X158 | 35  | AWIAPKPWTAWKV |
| A1X158 | 74  | AWKAPPAAWTAWK |
| A1X158 | 93  | TAWKAPPPTWTAW |
| A1X158 | 352 | WTAWKVPPPAWTA |
| A1X158 | 443 | TAWRATPPPTWTA |
| A1X158 | 557 | WTAWTAPPAYGXX |
| Q16665 | 45  | ELAHQLPLPHNVS |
| Q16665 | 47  | AHQLPLPHNVSSH |
| Q16665 | 138 | VFDFTHPCDHEEM |
| Q16665 | 208 | DTNSNQPCGYKK  |
| Q16665 | 215 | QCGYKKPMTCLV  |
| Q16665 | 216 | CGYKKPMTCLVL  |
| Q16665 | 226 | LVLICEPIPHPSN |
| Q16665 | 228 | LICEPIPHPSNIE |
| Q16665 | 230 | CEPIPHPSNIEIP |
| Q16665 | 236 | PSNIEIPLDSKTF |

---

---

|        |     |                |
|--------|-----|----------------|
| Q16665 | 267 | ELMGYEPEELLGR  |
| Q16665 | 332 | NTKNSQPQCIVCV  |
| Q16665 | 363 | TECVLKPVESDM   |
| Q16665 | 394 | DKLKKEPDALTLL  |
| Q16665 | 429 | QQLEEVPLYNDVM  |
| Q16665 | 437 | YNDVMLPSPNEKL  |
| Q16665 | 439 | DVMLPSPNEKLQN  |
| Q16665 | 452 | INLAMSPLPTAET  |
| Q16665 | 454 | LAMSPLPTAETPK  |
| Q16665 | 459 | LPTAETPKPLRSS  |
| Q16665 | 461 | TAETPKPLRSSAD  |
| Q16665 | 468 | LRSSADPALNQEY  |
| Q16665 | 480 | VALKLEPNPESLE  |
| Q16665 | 482 | LKLEPNPESLELS  |
| Q16665 | 492 | ELSFTMPQIQDQT  |
| Q16665 | 499 | QIQDQTPSPSDGS  |
| Q16665 | 501 | QDQTPSPSDGSTR  |
| Q16665 | 511 | STRQSSPEPNSPS  |
| Q16665 | 513 | RQSSPEPNSPSEY  |
| Q16665 | 516 | SPEPNSPSEYCFY  |
| Q16665 | 549 | DTEAKNPFSTQDT  |
| Q16665 | 567 | MLAPYIPMDDDFQ  |
| Q16665 | 582 | SFDQLSPLESSSA  |
| Q16665 | 590 | ESSSASPESASPQ  |
| Q16665 | 595 | SPESASPQSTVTV  |
| Q16665 | 610 | QTQIQEPTANATT  |
| Q16665 | 642 | KILIASPSPTHIH  |
| Q16665 | 644 | LIASPSPTHIHKE  |
| Q16665 | 658 | TSATSSPYRDTQS  |
| Q16665 | 669 | QSRTASPNRAGKG  |
| Q16665 | 685 | QTEKSHPRSPNVL  |
| Q16665 | 688 | KSHPRSPNVLSPA  |
| Q16665 | 702 | SQRTTVPEEELNP  |
| Q16665 | 708 | PEEELNPKILALQ  |
| Q16665 | 741 | GTLLQQPDDHAAT  |
| Q16665 | 775 | KTIILIPSDLACR  |
| Q16665 | 793 | MDESGLPQLTSYD  |
| Q16665 | 805 | DCEVNAPIQGSRN  |
| Q9Y2N7 | 84  | VGAGGEPLDACYL  |
| Q9Y2N7 | 147 | LQDALTQQQTLR   |
| Q9Y2N7 | 159 | RRKVEAPTERCFS  |
| Q9Y2N7 | 200 | HMRAYKPPAQTS   |
| Q9Y2N7 | 201 | MRAYKPPAQTSPA  |
| Q9Y2N7 | 206 | PPAQTS         |
| Q9Y2N7 | 210 | PAGSPDS        |
| Q9Y2N7 | 214 | TSPAGSPDSEPL   |
| Q9Y2N7 | 215 | GSPDSEPLQCLV   |
| Q9Y2N7 | 215 | SPDSEPLQCLVL   |
| Q9Y2N7 | 234 | HPGSLEPLGRGA   |
| Q9Y2N7 | 235 | PGSLEPLGRGAF   |
| Q9Y2N7 | 266 | EVAGYSPDDLIGC  |
| Q9Y2N7 | 329 | VSGGRGPQSEIV   |
| Q9Y2N7 | 363 | EQHSRRPIQRGAP  |
| Q9Y2N7 | 369 | PIQRGAPSQKDT   |
| Q9Y2N7 | 375 | PSQKDTNP       |
| Q9Y2N7 | 377 | PGDSL          |
| Q9Y2N7 | 384 | QKDTNP         |
| Q9Y2N7 | 386 | PGDSLDT        |
| Q9Y2N7 | 394 | GDSDLTPGPRILA  |
| Q9Y2N7 | 395 | SLDTPGPRILAFL  |
| Q9Y2N7 |     | ILAFHLHPPSLSEA |
| Q9Y2N7 |     | LAFLHPPSLSEAA  |

---

---

|        |     |                |
|--------|-----|----------------|
| Q9Y2N7 | 406 | AALAADPRRFCSP  |
| Q9Y2N7 | 412 | PRRFCSPDLRRL   |
| Q9Y2N7 | 420 | LRRLLGPILDGAS  |
| Q9Y2N7 | 431 | ASVAATPSTPLAT  |
| Q9Y2N7 | 434 | AATPSTPLATRHP  |
| Q9Y2N7 | 440 | PLATRHPQSPLSA  |
| Q9Y2N7 | 443 | TRHPQSPLSADLP  |
| Q9Y2N7 | 449 | PLSADLPDELPVG  |
| Q9Y2N7 | 453 | DLPDELPGVTENV  |
| Q9Y2N7 | 509 | NASEQLPRAYHRP  |
| Q9Y2N7 | 515 | PRAYHRPLGAVPR  |
| Q9Y2N7 | 520 | RPLGAVPRPRARS  |
| Q9Y2N7 | 522 | LGAVPRPRARSFH  |
| Q9Y2N7 | 532 | SFHGLSPPALEPS  |
| Q9Y2N7 | 533 | FHGLSPPALEPSL  |
| Q9Y2N7 | 537 | SPPALEPSLLPRW  |
| Q9Y2N7 | 541 | LEPSLLPRWGSDP  |
| Q9Y2N7 | 547 | PRWGSDPRLSCSS  |
| Q9Y2N7 | 554 | RLSCSSPSRGDPS  |
| Q9Y2N7 | 559 | SPSRGDPASASSPM |
| Q9Y2N7 | 564 | DPSASSPMAGARK  |
| Q9Y2N7 | 591 | ELLGVRPPKRSPS  |
| Q9Y2N7 | 592 | LLGVRPPKRSPSP  |
| Q9Y2N7 | 596 | RPPKRSPSPEHEN  |
| Q9Y2N7 | 598 | PKRSPSPPEHENFL |
| Q9Y2N7 | 607 | ENFLLFPLSLSFL  |
| Q9Y2N7 | 618 | FLLTGGPAPGSLQ  |
| Q9Y2N7 | 620 | LTGGPAPGSLQDP  |
| Q9Y2N7 | 626 | PGSLQDPSTPLLN  |
| Q9Y2N7 | 629 | LQDPSTPLNLNE   |
| Q9Y2N7 | 636 | LLNLNEPLGLGPS  |
| Q9Y2N7 | 641 | EPLGLGPSLLSPY  |
| Q9Y2N7 | 646 | GPSLLSPYSEDT   |
| Q9Y2N7 | 655 | DEDTTQPGGPFQP  |
| Q9Y2N7 | 658 | TTQPGGPFQPRAG  |
| Q7XAD0 | 78  | RHDSVLPPSPKT   |
| Q7XAD0 | 86  | PSPKTDPIIGQLT  |
| Q7XAD0 | 98  | TTITTTPHHDDTV  |
| Q7XAD0 | 107 | DDTVAAPPVGGRH  |
| Q7XAD0 | 108 | DTVAAPPVGGRHD  |
| Q7XAD0 | 124 | SPPPPKPQDEQRQ  |
| Q7XAD0 | 141 | SSSSTLPLQASYX  |
| Q93WP8 | 13  | IYLILSPFGAEAR  |
| Q93WP8 | 41  | GRGANLPPSPAS   |
| Q93WP8 | 60  | VSNSVSPTRTDEK  |
| Q93WP8 | 91  | NQLFSFPTSADNY  |
| Q93WP8 | 113 | FISYLLPVSYVWN  |
| Q93WP8 | 147 | RYWNRKPLSPSP   |
| Q93WP8 | 161 | PADGQRPLHSYXX  |
| Q93WP7 | 89  | NSNQLFPFLTSSD  |
| Q93WP7 | 149 | NRKPLSPSPKPA   |
| Q93WP7 | 150 | RKPLSPSPKPAD   |
| Q93WP7 | 152 | PLSPSPSPKPADGH |
| P01042 | 84  | IKEGDCPVQSGKT  |
| P01042 | 130 | QTCQITPAEGPVV  |
| P01042 | 134 | ITPAEGPVVTAQY  |
| P01042 | 148 | CLGCVHPISTQSP  |
| P01042 | 154 | PISTQSPDLEPIL  |
| P01042 | 158 | QSPDLEPILRHGI  |

---



---

|        |     |                         |
|--------|-----|-------------------------|
| P01042 | 216 | NFLFLT <b>P</b> DCKSLW  |
| P01042 | 252 | QNCDIY <b>P</b> GKDFVQ  |
| P01042 | 259 | GKDFVQ <b>P</b> PTKICV  |
| P01042 | 260 | KDFVQ <b>P</b> PTKICVG  |
| P01042 | 268 | KICVGC <b>P</b> RDIPTN  |
| P01042 | 272 | GC <b>P</b> RDIPTNSPEL  |
| P01042 | 359 | AEVYVV <b>P</b> WEKKIY  |
| P01042 | 366 | WEKKIY <b>P</b> TVNCQP  |
| P01042 | 372 | PTVNCQ <b>P</b> LGMISL  |
| P01042 | 404 | EETTV <b>S</b> PHTSMA   |
| P01042 | 405 | ETTV <b>S</b> PHTSMAP   |
| P01042 | 411 | PHTSM <b>A</b> PAQDEER  |
| P01042 | 534 | SEDST <b>T</b> PSAQTQE  |
| P01042 | 545 | QEKTEG <b>P</b> TPIPSL  |
| P01042 | 547 | KTEG <b>P</b> TPIPSLAK  |
| P01042 | 549 | EG <b>P</b> TPIPSLAKPG  |
| P01042 | 554 | IPSLAK <b>P</b> GVTVTF  |
| P01042 | 574 | LIATMM <b>P</b> PISPAP  |
| P01042 | 575 | IATMM <b>P</b> PISPAPI  |
| P01042 | 578 | MM <b>P</b> PISPAPIQSD  |
| P01042 | 580 | PPISP <b>A</b> PIQSDDD  |
| P01042 | 589 | SDDDWI <b>P</b> DIQIDP  |
| P01042 | 595 | PDIQID <b>P</b> NGLSFN  |
| P01042 | 602 | NGLSF <b>N</b> PISDFPD  |
| P01042 | 607 | NPISDF <b>P</b> DTTSPK  |
| P01042 | 612 | FPDT <b>T</b> SPKCPGRP  |
| P01042 | 615 | TTSP <b>K</b> CPGRPWS   |
| P01042 | 618 | PKCP <b>G</b> RPWKSVSE  |
| P01042 | 627 | SVSEIN <b>P</b> TTQMKE  |
| P14618 | 4   | XXXMS <b>K</b> PHSEAGT  |
| P14618 | 38  | RLDID <b>S</b> PPITARN  |
| P14618 | 39  | LDID <b>S</b> PPITARNT  |
| P14618 | 53  | IICTIG <b>P</b> ASRSVE  |
| P14618 | 102 | ESFAS <b>D</b> PILYRPV  |
| P14618 | 107 | DPILY <b>R</b> PVAVALD  |
| P14618 | 212 | KKGVN <b>L</b> PGAAVDL  |
| P14618 | 219 | GAAVD <b>L</b> PAVSEKD  |
| P14618 | 302 | DLGIEI <b>P</b> AEKVFL  |
| P14618 | 323 | CNRAG <b>K</b> PVICATQ  |
| P14618 | 338 | ESMIK <b>K</b> PRPTRAE  |
| P14618 | 340 | MIK <b>K</b> PRPTRAECS  |
| P14618 | 371 | TAKGDY <b>P</b> LEAVRM  |
| P14618 | 446 | QVARY <b>R</b> PRAPIIA  |
| P14618 | 449 | RYRPR <b>A</b> PIIAVTR  |
| P14618 | 457 | IAVTR <b>N</b> PQTARQA  |
| P14618 | 471 | LYRGIF <b>P</b> VLCCKDP |
| P14618 | 477 | PVLCKD <b>P</b> VQEAWA  |
| P14618 | 517 | VLTGWR <b>P</b> SGFTN   |
| Q9BPB1 | 26  | LFQE <b>K</b> RPMMKKIDF |
| P02820 | 4   | XXXMR <b>T</b> PMLLALL  |
| P02820 | 25  | GRADAK <b>P</b> GDAESG  |
| P02820 | 62  | WLGAP <b>A</b> PYPDPLE  |
| P02820 | 64  | GAP <b>A</b> PYPDPLEPK  |
| P02820 | 66  | PAPYPD <b>P</b> LEPKRE  |
| P02820 | 69  | YPDP <b>L</b> EPKREVCE  |
| P02820 | 78  | EVCEL <b>N</b> PDCDELA  |
| P02821 | 4   | XXXYL <b>A</b> PGLGAPA  |
| P84349 | 49  | SEVV <b>K</b> RPRRYLYQ  |
| P80760 | 10  | KPPVE <b>K</b> PPVYKPP  |

---

---

|        |     |                |
|--------|-----|----------------|
| P52285 | 40  | IGESDSPIPLPNV  |
| P52285 | 42  | ESDSPIPLPNVTS  |
| P52285 | 44  | DSPIPLPNVTSTI  |
| P52285 | 65  | RHHHQHPS PQGDD |
| P52285 | 67  | HHQHPS PQGDDKK |
| P52285 | 82  | KRLDDI PPYDRDF |
| P52285 | 83  | RLDDI PPYDRDFC |
| P52285 | 94  | FCKVDQPTLFELI  |
| P52285 | 128 | MIRGKTPEEIRKI  |
| Q0VKG8 | 55  | EERRDRPPSWIPK  |
| Q9M0S4 | 34  | PTRSPLPSPAQPP  |
| Q9M0S4 | 39  | LPSPAQPRTAAP   |
| Q9M0S4 | 40  | PSPAQPRTAAP    |
| Q9M0S4 | 45  | PPRTAAPTPSITP  |
| Q9M0S4 | 47  | RTAAPTPSITPTP  |
| Q9M0S4 | 53  | PSITPTPTPTPSA  |
| Q9M0S4 | 61  | PTPSATPTAAPVS  |
| Q9M0S4 | 65  | ATPTAAPVSPAG   |
| Q9M0S4 | 68  | TAAPVSPAGSPL   |
| Q9M0S4 | 69  | AAPVSPAGSPLP   |
| Q9M0S4 | 73  | SPPAGSPLPSSAS  |
| Q9M0S4 | 80  | LPSSASPPAPPTS  |
| Q9M0S4 | 81  | PSSASPPAPPTSL  |
| Q9M0S4 | 83  | SASPPAPPTSLTP  |
| Q9M0S4 | 84  | ASPPAPPTSLTPD  |
| Q9M0S4 | 97  | GAPVAGPTGSTPV  |
| Q9M0S4 | 102 | GPTGSTPVDNNNA  |
| Q9LJD9 | 45  | DAAMFVPALFASV  |
| O82337 | 63  | LTYLIHPLDASSS  |
| Q9SJY7 | 33  | APTTVT PPPTALP |
| Q9SJY7 | 39  | PPPTALPPVTAET  |
| Q9SJY7 | 40  | PPTALPPVTAETP  |
| Q9SJY7 | 52  | PSPIASPPVPVNE  |
| Q9SJY7 | 53  | SPIASPPVPVNEP  |
| Q9SJY7 | 59  | PVPVNEPTPAPTT  |
| Q9SJY7 | 63  | NEPTPAPTTSPTT  |
| Q9SJY7 | 75  | TSPVASPPQTDAP  |
| Q9SJY7 | 76  | SPVASPPQTDAPA  |
| Q9SJY7 | 83  | QTDAPAPGPSAGL  |
| Q9SJY7 | 85  | DAPAPGPSAGLTP  |
| Q9SJY7 | 91  | PSAGLTP TSSPAP |
| Q9SJY7 | 95  | LTPTSSPAPGPDG  |
| Q9SJY7 | 97  | PTSSPAPGPDGAA  |
| Q9SJY7 | 99  | SSPAPGPDGAADA  |
| Q9SJY7 | 106 | DGAADAPSAAWAN  |
| Q9ZT16 | 45  | PVATPPP VATPPP |
| Q9ZT16 | 55  | PPPAATPAPATPP  |
| Q9ZT16 | 72  | PAPATTPPSVAPS  |
| Q9ZT16 | 73  | APATTPPSVAPSP  |
| Q9ZT16 | 79  | PSVAPS PADVPTA |
| Q9ZT16 | 83  | PSPADVPTASPPA  |
| Q9ZT16 | 88  | VPTASPPAPEGPT  |
| Q9ZT16 | 90  | TASPPAPEGPTVS  |
| Q9ZT16 | 101 | VSPSSAPGPSDAS  |
| Q9ZT16 | 108 | GPSDASPAPSAAF  |
| Q8LG54 | 53  | APTTTPPAVSPA   |
| Q8LG54 | 60  | PAVSPAPTSSPPS  |
| Q8LG54 | 90  | EGPGVSPGELAPT  |
| Q8LG54 | 97  | GELAPT PSDASAP |

---

---

|        |      |                |
|--------|------|----------------|
| Q8LG54 | 104  | SDASAPPPNAALT  |
| Q9C5S0 | 23   | GVTGQAPTSPPTA  |
| Q9C5S0 | 36   | TPAPPTPTTPPPA  |
| Q9C5S0 | 51   | PPPVSAAPPVTTT  |
| Q9C5S0 | 70   | APPPANPPPPVSS  |
| Q9C5S0 | 112  | PPVATPPAPPLAS  |
| Q9C5S0 | 126  | PAQVPAPAPTTKP  |
| Q9C5S0 | 135  | TTKPDSPPSPSS   |
| Q9C5S0 | 137  | KPDSPSPSPSSSP  |
| Q9C5S0 | 146  | SSSPPLPSSDAPG  |
| Q9C5S0 | 153  | SSDAPGPSTDSIS  |
| Q9C5S0 | 160  | STDSISPAPSPTD  |
| Q9C5S0 | 162  | DSISPAPSPTDVN  |
| P02745 | 4    | XXXMEGPRGWLVL  |
| P02745 | 29   | EDLCRAPDGKKGE  |
| P02745 | 113  | GNIKDQPRPAFSA  |
| P02745 | 115  | IKDQPRPAFSAIR  |
| P02745 | 124  | SAIRRNPPMGGNV  |
| P02745 | 125  | AIRRNPPMGGNVV  |
| P02745 | 143  | ITNQEEPYQNHSG  |
| P02745 | 221  | VWVEKDKKKGHIY  |
| P02747 | 5    | XXMDVGPSLPHL   |
| P02747 | 9    | VGPSSLPHLGLKL  |
| P02747 | 131  | TRQTHQPPAPNSL  |
| P02747 | 132  | RQTHQPPAPNSLI  |
| P02747 | 134  | THQPPAPNSLIRF  |
| P02747 | 147  | NAVLTNPQGDYDT  |
| P58782 | 5    | XXGCCGPYPNAAC  |
| P0C8W0 | 9    | TLGILLPIALLLP  |
| P0C8W0 | 15   | PIALLLPLANPAE  |
| P0C8W0 | 19   | LLPLANPAENGDG  |
| P0C8W0 | 29   | GDGQAMPRTNLR   |
| P0C8W0 | 73   | GPCCCKPNFTCQI  |
| Q7Z094 | 36   | STNWILPGCSTSS  |
| Q9U3Z3 | 23   | FLNLVVPTSACRA  |
| Q9U3Z3 | 57   | GHPCRHPGKRSL   |
| P60245 | 12   | LYGSCRPFPGCYN  |
| P02453 | 36   | GQEEDI PPVTCVQ |
| P02453 | 37   | QEEDI PPVTCVQN |
| P02453 | 82   | DELDKDCPNAKVPT |
| P02453 | 102  | PEGQESPTDQETT  |
| P02453 | 1017 | SGREGAPGAEGSP  |
| P02453 | 1304 | CVYPTQPSVAQKN  |
| P0C2W8 | 1031 | PGPPGPPSGAFDF  |
| P12111 | 8    | RKHRHLPLVAVFC  |
| P12111 | 21   | LFLSGFPTTHAQQ  |
| P12111 | 143  | RAGDGVQVIVVL   |
| P12111 | 161  | KDGLALPSAELKS  |
| P12111 | 223  | VHSSVSPERAGDT  |
| P12111 | 273  | NLLEKLPIGTQQI  |
| P12111 | 357  | VLISAGPSSDEIR  |
| P12111 | 403  | NLVFTVPEFRSFG  |
| P12111 | 417  | LQEKLLPYIVGVA  |
| P12111 | 431  | RHIVLKPTIVTQ   |
| P12111 | 432  | HIVLKPTIVTQV   |
| P12111 | 495  | YADTVRPEFYFNT  |
| P12111 | 503  | FYFNTHPTKREVI  |
| P12111 | 517  | AVRKMKPLDGSAL  |
| P12111 | 550  | RAAEGI PKLLVLI |

---

---

|        |      |                |
|--------|------|----------------|
| P12111 | 568  | LDEISQPAQELKR  |
| P12111 | 605  | SSLVFIPAEFRAA  |
| P12111 | 612  | AEFRAAPLQGMLP  |
| P12111 | 618  | PLQGMLPGLLAPL  |
| P12111 | 623  | LPGLLAPLRTLSG  |
| P12111 | 631  | RTLSGTPEVHSNK  |
| P12111 | 656  | VGKTNFPYVRDFV  |
| P12111 | 793  | EQIAFNPSLVYLM  |
| P12111 | 806  | DDFSSLPALPQQL  |
| P12111 | 809  | SSLPALPQQLIQP  |
| P12111 | 815  | PQQLIQPLTTYVS  |
| P12111 | 828  | GGVEEVPLAQPES  |
| P12111 | 832  | EVPLAQPESKRDI  |
| P12111 | 853  | NLVGQFPVVRDFL  |
| P12111 | 870  | DELNVKPEGTRIA  |
| P12111 | 897  | DEHQSKPEILNLV  |
| P12111 | 959  | SDRVDGPASNLIKQ |
| P12111 | 970  | KQSGVVPFIFQAK  |
| P12111 | 980  | QAKNADPAELEQI  |
| P12111 | 990  | EQIVLSPAFILAA  |
| P12111 | 1000 | LAAESLPKIGDLH  |
| P12111 | 1007 | KIGDLHPQIVNLL  |
| P12111 | 1021 | SVHNGAPAPVSGE  |
| P12111 | 1023 | HNGAPAPVSGEKD  |
| P12111 | 1045 | GVRSGFPLLKEFV  |
| P12111 | 1104 | LTLLGGPTPNTGA  |
| P12111 | 1106 | LLGGPTPNTGAAL  |
| P12111 | 1151 | GDDVRNPSVVVKR  |
| P12111 | 1162 | KRGGAVPIGIGIG  |
| P12111 | 1182 | QTISFIPDFAVAI  |
| P12111 | 1189 | DFAVAIPTFRQLG  |
| P12111 | 1218 | EL SRLQPVLQPLP |
| P12111 | 1222 | LQPVLQPLPSPGV  |
| P12111 | 1224 | PVLQPLPSPGVGG  |
| P12111 | 1226 | LQPLPSPGVGGKR  |
| P12111 | 1246 | GSQSAGPEFQYVR  |
| P12111 | 1304 | AVQRLRPKGGRQI  |
| P12111 | 1327 | RNIFKRPLGSRIE  |
| P12111 | 1366 | KQFGVAPFTIARN  |
| P12111 | 1385 | VKISLSP EYVFSV |
| P12111 | 1398 | STFRELPSLEQKL  |
| P12111 | 1407 | EQKLLTPITTLTS  |
| P12111 | 1426 | LASTRYPPPAVES  |
| P12111 | 1428 | STRYPPPAVESDA  |
| P12111 | 1449 | SSEGVRPDGFAHI  |
| P12111 | 1470 | RRLNIGPSKVRVG  |
| P12111 | 1486 | FSNDVFPEFYLKT  |
| P12111 | 1498 | TYRSQAPVLDAIR  |
| P12111 | 1513 | RLRGGSPLNTGKA  |
| P12111 | 1590 | QTITNDPRLVFTV  |
| P12111 | 1603 | REFRELPNIEERI  |
| P12111 | 1615 | IMNSFGPSAATPA  |
| P12111 | 1628 | PPGVDTPPPSRPE  |
| P12111 | 1629 | PGVDTPPPSRPEK  |
| P12111 | 1630 | GVDTPPPSRPEKK  |
| P12111 | 1633 | TPPPSRPEKKKAD  |
| P12111 | 1744 | RLDQRVQIAFVI   |
| P12111 | 1826 | MHETLCPGVTDA   |
| P12111 | 1883 | CSGGRSPTVRVSV  |

---

---

|        |      |                |
|--------|------|----------------|
| P12111 | 1894 | SVVANTPSGPVEA  |
| P12111 | 1897 | ANTPSGPVEAFDF  |
| P12111 | 1908 | DFDEYQPEMLEKF  |
| P12111 | 1922 | NMRSQHPLYLTED  |
| P12111 | 2005 | GFMYDRPLRLNLL  |
| P12111 | 2033 | KACCGVPCKCSGQ  |
| P12111 | 2160 | RGDPGNPGQDSQE  |
| P12111 | 2218 | KGGPGQPGFEGEQ  |
| P12111 | 2388 | SIKDKCPCCYGPL  |
| P12111 | 2393 | CPCCYGLEPCPVF  |
| P12111 | 2397 | YGPLECVPFPTTEL |
| P12111 | 2400 | LECPVFPTELAF   |
| P12111 | 2440 | IAESNCPRGARVA  |
| P12111 | 2519 | VFFSNTPTRASPQ  |
| P12111 | 2524 | TPTRASQQLREAV  |
| P12111 | 2540 | SDAGITPLFLTRQ  |
| P12111 | 2569 | GHALVLPAGRDLT  |
| P12111 | 2595 | DICNIDPSCGFGS  |
| P12111 | 2604 | GFGSWRPSFRDRR  |
| P12111 | 2653 | RQLDMSDPKASQ   |
| P12111 | 2655 | LDMSDPKASQHF   |
| P12111 | 2671 | AVVQHAPSESVDN  |
| P12111 | 2681 | VDNASMPVKVEF   |
| P12111 | 2682 | DNASMPVKVEFS   |
| P12111 | 2731 | NVFESAPNPRDLK  |
| P12111 | 2733 | FESAPNPRDLKIV  |
| P12111 | 2790 | YTFASEPNDVFFK  |
| P12111 | 2808 | TELNEEPLMRFR   |
| P12111 | 2817 | RFGRLLPFSVSSE  |
| P12111 | 2830 | NAFYLSPIRKQC   |
| P12111 | 2844 | WFQGDQPTKNLVK  |
| P12111 | 2859 | HKQVNVNNVTSS   |
| P12111 | 2866 | NNVTSSPTSNPVT  |
| P12111 | 2870 | SSPTSNPVTTTKP  |
| P12111 | 2882 | PVTTTKPVTTTK   |
| P12111 | 2903 | VTIINQPSVKPAA  |
| P12111 | 2907 | NQPSVKPAAAKPA  |
| P12111 | 2914 | AAAKPAPAKPVAA  |
| P12111 | 2917 | KPAPAKPVAAPV   |
| P12111 | 2932 | KMATVRPPVAVKP  |
| P12111 | 2967 | KPVATKPEVPRPQ  |
| P12111 | 2970 | ATKPEVPRPQAAK  |
| P12111 | 3014 | HWERAEPGPYFY   |
| P12111 | 3015 | WERAEPGPYFYD   |
| P12111 | 3017 | RAEPPGPYFYDLT  |
| P12111 | 3081 | STKKSQPPPPQPA  |
| P12111 | 3082 | TKKSQPPPPQPAR  |
| P12111 | 3083 | KKSQPPPPQPARS  |
| P12111 | 3084 | KSQPPPPQPARSA  |
| P12111 | 3086 | QPPPPQPARSASS  |
| P12111 | 3103 | LMVSTEPLALTET  |
| P12111 | 3115 | TDICKLPKDEGTC  |
| P12111 | 3132 | LKWYYDPNTKSCA  |
| P12111 | 3164 | CEKVCAPVLAKPG  |
| P60513 | 13   | YGFCSLPILKNGL  |
| Q02388 | 19   | GILAEAPRVRAQH  |
| Q02388 | 67   | LEGLVLPFSGAAS  |
| Q02388 | 133  | ADHVFLPQLARPG  |
| Q02388 | 138  | LPQLARPGVPKVC  |

---

---

|        |     |                         |
|--------|-----|-------------------------|
| Q02388 | 141 | LARPGV <b>P</b> KVCILI  |
| Q02388 | 190 | KRVASQ <b>P</b> TSDFFF  |
| Q02388 | 209 | ILRTL <b>L</b> PLVSRRV  |
| Q02388 | 223 | TTAGGV <b>P</b> VTRPPD  |
| Q02388 | 227 | GVPVTR <b>P</b> PDDSTS  |
| Q02388 | 228 | VPVTR <b>P</b> PDDSTSA  |
| Q02388 | 235 | DDSTSA <b>P</b> RDVLVS  |
| Q02388 | 243 | DLVLSE <b>P</b> SSQSLR  |
| Q02388 | 258 | WTAASG <b>P</b> VTYGKV  |
| Q02388 | 268 | YKVQYT <b>P</b> LTGLGQ  |
| Q02388 | 275 | LTGLGQ <b>P</b> LPSEERQ |
| Q02388 | 277 | GLGQ <b>P</b> LPSEERQEV |
| Q02388 | 286 | RQEVNV <b>P</b> AGETSV  |
| Q02388 | 331 | TTALEG <b>P</b> ELTIQN  |
| Q02388 | 367 | RVLSGG <b>P</b> TQQQEL  |
| Q02388 | 375 | QQQELG <b>P</b> QGGSVL  |
| Q02388 | 387 | LLRDLE <b>P</b> GTDYEV  |
| Q02388 | 405 | FGRSVG <b>P</b> ATSLMA  |
| Q02388 | 423 | VEQTLR <b>P</b> VILGPT  |
| Q02388 | 428 | RPVILG <b>P</b> TSILLS  |
| Q02388 | 439 | LSWNLV <b>P</b> EARGYR  |
| Q02388 | 456 | RETGLE <b>P</b> PQKVVL  |
| Q02388 | 457 | ETGLE <b>P</b> PQKVVL   |
| Q02388 | 463 | PQKVVL <b>P</b> SDVTRY  |
| Q02388 | 496 | GHEVAT <b>P</b> ATVVPT  |
| Q02388 | 501 | TPATVV <b>P</b> TGPELP  |
| Q02388 | 504 | TVVPTG <b>P</b> ELPVSP  |
| Q02388 | 507 | PTGPEL <b>P</b> VSPVTD  |
| Q02388 | 510 | PELPVS <b>P</b> VTDLQA  |
| Q02388 | 520 | LQATEL <b>P</b> GQVRV   |
| Q02388 | 530 | VRVSW <b>P</b> VPGATQ   |
| Q02388 | 554 | ERTLV <b>L</b> PGSQTA   |
| Q02388 | 595 | LTVRRE <b>P</b> ETPLAV  |
| Q02388 | 598 | RREPET <b>P</b> LAVPGL  |
| Q02388 | 602 | ETPLAV <b>P</b> GLRVVV  |
| Q02388 | 637 | WSTGSG <b>P</b> ESSQTL  |
| Q02388 | 644 | ESSQTL <b>P</b> PDSTAT  |
| Q02388 | 645 | SSQTL <b>P</b> PDSTATD  |
| Q02388 | 657 | DITGLQ <b>P</b> GTTYQV  |
| Q02388 | 675 | RGREEG <b>P</b> AAVIVA  |
| Q02388 | 685 | IVARTD <b>P</b> LGPVRT  |
| Q02388 | 688 | RTDPLG <b>P</b> VRTVHV  |
| Q02388 | 725 | WWSAHG <b>P</b> EKSQLV  |
| Q02388 | 763 | VAGVDG <b>P</b> PASVVV  |
| Q02388 | 764 | AGVDG <b>P</b> PASVVV   |
| Q02388 | 773 | VVVRTA <b>P</b> EPVGRV  |
| Q02388 | 775 | VRTA <b>P</b> EPVGRVSR  |
| Q02388 | 816 | GRSEGG <b>P</b> MRHQIL  |
| Q02388 | 823 | MRHQIL <b>P</b> GNNTDSA |
| Q02388 | 863 | SIVVTT <b>P</b> PPEAPPA |
| Q02388 | 867 | TTPPEA <b>P</b> PALGTL  |
| Q02388 | 868 | TPPEA <b>P</b> PALGTLH  |
| Q02388 | 889 | LRLRWE <b>P</b> VPRAQG  |
| Q02388 | 891 | LRWE <b>P</b> VPRAQGFL  |
| Q02388 | 902 | FLLHWQ <b>P</b> EGGQEQ  |
| Q02388 | 914 | QSRVLG <b>P</b> ELSSYH  |
| Q02388 | 939 | RLSVLG <b>P</b> AGEGPS  |
| Q02388 | 944 | GPAGEG <b>P</b> SAEVTA  |
| Q02388 | 955 | TARTES <b>P</b> RVPSIE  |

---

---

|        |      |                |
|--------|------|----------------|
| Q02388 | 958  | TESPRVPSIELRV  |
| Q02388 | 978  | VTLAWTPVSRASS  |
| Q02388 | 991  | YILSWRPLRGPGQ  |
| Q02388 | 995  | WRPLRGPGQEVPG  |
| Q02388 | 1000 | GPGQEVPGSPQTL  |
| Q02388 | 1003 | QEVPGSPQTLPGI  |
| Q02388 | 1007 | GSPQTLPGISSSQ  |
| Q02388 | 1020 | RVTGLEPGVSYIF  |
| Q02388 | 1030 | YIFSLTPVLDGVR  |
| Q02388 | 1046 | ASVTQT PVCPRGL |
| Q02388 | 1049 | TQTPVCPRGLADV  |
| Q02388 | 1059 | ADVVF LPHATQDN |
| Q02388 | 1085 | LVLALGPLGPQAV  |
| Q02388 | 1088 | ALGPLGPQAVQVG  |
| Q02388 | 1102 | LSYSHRPSPLFPL  |
| Q02388 | 1104 | YSHRPSPLFPLNG  |
| Q02388 | 1107 | RPSPLFPLNGSHD  |
| Q02388 | 1125 | QRIRDMPYMDPSG  |
| Q02388 | 1129 | DMPYMDPSGNNLG  |
| Q02388 | 1148 | HRYMLAPDAPGRR  |
| Q02388 | 1151 | MLAPDAPGRRQHV  |
| Q02388 | 1158 | GRRQHVP GVMVLL |
| Q02388 | 1168 | VLLVDEPLRGDIF  |
| Q02388 | 1176 | RGDIFSPIREAAQ  |
| Q02388 | 1197 | GMAGADPEQLRRL  |
| Q02388 | 1205 | QLRRLAPGMDSVQ  |
| Q02388 | 1220 | FAVDDGPSLDQAV  |
| Q02388 | 1242 | ASFTTQPRPEPCP  |
| Q02388 | 1244 | FTTQPRPEPCPVY  |
| Q02388 | 1246 | TQPRPEPCPVYCP  |
| Q02388 | 1248 | PRPEPCPVYCPKG  |
| Q02388 | 1361 | VIGGEGPGLPGRK  |
| Q02388 | 1410 | DRGERGPPGPGE   |
| Q02388 | 1411 | RGERGPPGPGE    |
| Q02388 | 1547 | DPAVVGPAVAGPK  |
| Q02388 | 1713 | RLVDTGPGAREKG  |
| Q02388 | 1721 | AREKGE PGDRGQE |
| Q02388 | 1936 | RGLRGE PGSPVNV |
| Q02388 | 1972 | SSGSFLVPERRR   |
| Q02388 | 1974 | GSFLPVPERRRGP  |
| Q02388 | 2099 | KVSVDEPGPGLSG  |
| Q02388 | 2101 | SVDEPGPGLSGEQ  |
| Q02388 | 2134 | KGDRGVPGIKGDR  |
| Q02388 | 2714 | IGGFPGPSGNDGS  |
| Q02388 | 2832 | SQLHAVPVLRVSH  |
| Q02388 | 2846 | EEEERVPPEDDEY  |
| Q02388 | 2847 | EEERVPPEDDEYS  |
| Q02388 | 2866 | VEEYQDPEAPWDS  |
| Q02388 | 2869 | YQDPEAPWDSDDP  |
| Q02388 | 2875 | PWDSDDPCSLPLD  |
| Q02388 | 2906 | STEACHPFVYGGC  |
| Q02388 | 2930 | ACERRCPPRVVQS  |
| Q02388 | 2931 | CERRCPPRVVQSQ  |
| P23805 | 15   | LLLLLTQPWRSLGA |
| P23805 | 42   | TLVMCSPLESGLP  |
| P23805 | 59   | QDGRECPHGEKGD  |
| P23805 | 249  | KKAVLFPDGQAVG  |
| P23805 | 285  | KGQLASPRSSAEN  |
| P23805 | 321  | EGRFTYPTGEILV  |

---



|        |     |        |   |    |   |   |   |   |   |
|--------|-----|--------|---|----|---|---|---|---|---|
| P23805 | 336 | NWADGE | P | NN | S | D | E | G |   |
| P23805 | 344 | NSDEGQ | P | E  | N | C | V | E | I |
| P23805 | 352 | NCVEIF | P | D  | G | K | W | N | D |
| P23805 | 360 | GKWNDV | P | C  | S | K | Q | L | L |
| P29602 | 16  | NTGWSV | P | S  | S | P | N | F | Y |
| P29602 | 19  | WSVPSS | P | N  | F | Y | S | Q | W |
| P29602 | 42  | SLQFNF | P | A  | N | A | H | N | V |
| P29602 | 74  | DVERTS | P | V  | I | E | R | L | D |
| Q9BPG6 | 34  | DDVPLS | P | L  | R | D | N | L | K |
| Q25460 | 5   | XXTKHE | P | V  | Y | K | P | V | K |
| Q25460 | 9   | HEPVYK | P | V  | K | T | S | Y | S |
| Q25460 | 17  | KTSYSA | P | Y  | K | P | P | T | Y |
| Q25460 | 20  | YSAPYK | P | P  | T | Y | Q | P | L |
| Q25460 | 21  | SAPYKP | P | T  | Y | Q | P | L | K |
| Q25460 | 34  | KKVDYR | P | T  | K | S | Y | P | P |
| Q25460 | 39  | RPTKSY | P | P  | T | Y | G | S | K |
| Q25460 | 40  | PTKSY  | P | P  | T | Y | G | S | K |
| Q25460 | 50  | SKTNYL | P | L  | A | K | K | L | S |
| Q25460 | 60  | KLSSYK | P | I  | K | T | T | Y | N |
| Q25460 | 72  | NAKTNY | P | P  | V | Y | K | P | K |
| Q25460 | 73  | AKTNYP | P | V  | Y | K | P | K | M |
| Q25460 | 87  | YPPTYK | P | K  | P | S | Y | P | P |
| Q25460 | 99  | PTYKSK | P | T  | Y | K | P | K | I |
| Q25460 | 168 | KTKKTY | P | S  | S | Y | K | A | K |
| P85065 | 9   | SWSLCT | P | G  | C | T | S | P | G |
| P19999 | 137 | TNHERM | P | F  | S | K | V | K | A |
| P19999 | 155 | RGTVAI | P | R  | N | A | E | E | N |
| P19999 | 203 | NWKKDE | P | N  | D | H | G | S | G |
| P08661 | 30  | GAQSSC | P | V  | I | A | C | S | S |
| P08661 | 37  | VIACSS | P | G  | L | N | G | F | P |
| P08661 | 143 | SSVRRM | P | L  | N | R | A | K | A |
| Q941C7 | 25  | SSLARN | P | V  | S | V | S | G | G |
| Q941C7 | 52  | VEDYGD | P | S  | A | N | P | K | H |
| Q941C7 | 56  | GDPSAN | P | K  | H | D | P | G | V |
| Q941C7 | 60  | ANPKHD | P | G  | V | P | P | S | A |
| P00877 | 3   | XXXXMV | P | Q  | T | E | T | K | A |
| P00877 | 27  | RLTYYT | P | D  | Y | V | V | R | D |
| P00877 | 44  | AAFRMT | P | Q  | L | G | V | P | P |
| P00877 | 49  | TPQLGV | P | P  | E | E | C | G | A |
| P00877 | 50  | PQLGVP | P | E  | E | C | G | A | A |
| P00877 | 89  | RCYDIE | P | V  | P | G | E | D | N |
| P00877 | 91  | YDIEPV | P | G  | E | D | N | Q | Y |
| P00877 | 141 | LEDLRI | P | P  | A | Y | V | K | T |
| P00877 | 142 | EDLRI  | P | P  | A | Y | V | K | T |
| P00877 | 176 | LGCTIK | P | K  | L | G | L | S | A |
| P00877 | 210 | ENVNSQ | P | F  | M | R | W | R | D |
| P00877 | 263 | AKELGV | P | I  | I | M | H | D | Y |
| P00877 | 372 | QDWCSM | P | G  | V | M | P | V | A |
| P00877 | 376 | SMPGVM | P | V  | A | S | G | G | I |
| P00877 | 388 | IHVWHM | P | A  | L | V | E | I | F |
| P00877 | 410 | GGTLGH | P | W  | G | N | A | P | G |
| P00877 | 415 | HPWGN  | A | P  | G | A | A | N | R |
| P00877 | 453 | SACKWS | P | E  | L | A | A | A | C |
| P08427 | 100 | RGLPGF | P | A  | Y | L | D | E | E |
| P08427 | 168 | IAPVPT | P | E  | E | N | E | A | I |
| P08427 | 195 | MIEDQT | P | G  | D | F | H | Y | L |
| P08427 | 213 | NYTNWY | P | G  | E | P | R | G | Q |
| P08427 | 216 | NWYPGE | P | R  | G | Q | G | K | E |
