# Supplementary material for: iHyd-PseAAC: Predicting Hydroxyproline and Hydroxylysine in Proteins by Incorporating Dipeptide Position-Specific Propensity into Pseudo Amino Acid Composition
Source: MDPI journal article supplement (doi:10.3390/ijms15057594), 2014-05-05
Supplement: s1 [file s1]

## Supplementary Information

**Supplementary Information S5.** The 156 experimentally validated hydroxyproline proteins and their hydroxylated sites retrieved from Swiss-Prot database.

| Uniprot ID | Position |
|------------|----------|
| P05623     | 28       |
| P05623     | 32       |
| P05623     | 34       |
| P05623     | 38       |
| Q3Y5Z3     | 39       |
| Q3Y5Z3     | 42       |
| Q3Y5Z3     | 48       |
| Q3Y5Z3     | 86       |
| Q60994     | 47       |
| Q60994     | 50       |
| Q60994     | 56       |
| Q60994     | 94       |
| Q15848     | 44       |
| Q15848     | 47       |
| Q15848     | 53       |
| Q15848     | 71       |
| Q15848     | 76       |
| Q15848     | 91       |
| Q15848     | 95       |
| P07550     | 382      |
| P07550     | 395      |
| Q9M0S4     | 24       |
| Q9M0S4     | 26       |
| Q9M0S4     | 28       |
| Q9M0S4     | 32       |
| Q9M0S4     | 36       |
| Q9STQ3     | 31       |
| Q9STQ3     | 33       |
| Q9STQ3     | 35       |
| O82337     | 31       |
| O82337     | 33       |
| O82337     | 35       |
| Q9LYF6     | 27       |
| Q9LYF6     | 29       |
| Q9LYF6     | 31       |
| Q9LJD9     | 32       |
| Q9LJD9     | 34       |
| Q9LJD9     | 36       |
| Q9SJY7     | 24       |
| Q9SJY7     | 26       |
| Q9SJY7     | 28       |
| Q9SJY7     | 34       |
| Q9SJY7     | 35       |
| Q9ZT16     | 24       |
| Q9ZT16     | 26       |
| Q9ZT16     | 28       |
| Q9ZT16     | 32       |
| Q9ZT16     | 33       |
| Q9ZT16     | 34       |
| Q9ZT16     | 37       |
| Q9ZT16     | 38       |
| Q9ZT16     | 39       |
| Q9C5S0     | 26       |
| Q9C5S0     | 27       |

---

|        |     |
|--------|-----|
| Q9C5S0 | 31  |
| Q9C5S0 | 33  |
| Q8LG54 | 24  |
| Q8LG54 | 26  |
| Q8LG54 | 28  |
| Q8LG54 | 35  |
| Q8LG54 | 36  |
| Q9LVC0 | 32  |
| Q9LVC0 | 34  |
| Q9LVC0 | 36  |
| Q9UKV8 | 700 |
| Q28989 | 37  |
| P32121 | 176 |
| P32121 | 181 |
| Q800F1 | 54  |
| Q0VTT8 | 52  |
| P84900 | 54  |
| P02745 | 39  |
| P02745 | 45  |
| P02745 | 54  |
| P02745 | 57  |
| P02745 | 73  |
| P02745 | 85  |
| P02745 | 97  |
| P02747 | 36  |
| P02747 | 39  |
| P02747 | 42  |
| P02747 | 45  |
| P02747 | 54  |
| P02747 | 63  |
| P02747 | 81  |
| P02747 | 93  |
| P02747 | 96  |
| P02747 | 99  |
| P02747 | 105 |
| Q4ZJN1 | 31  |
| Q4ZJN1 | 34  |
| Q4ZJN1 | 40  |
| Q4ZJN1 | 58  |
| Q4ZJN1 | 61  |
| Q4ZJN1 | 64  |
| Q4ZJN1 | 76  |
| Q4ZJN1 | 115 |
| Q4ZJN1 | 151 |
| Q4ZJN1 | 160 |
| Q4ZJN1 | 175 |
| P56973 | 54  |
| P69747 | 55  |
| P0DKP5 | 54  |
| P50982 | 46  |
| P85886 | 55  |
| D4HRK4 | 45  |
| P0C1X1 | 40  |
| P0C1X1 | 55  |
| P0C1X1 | 60  |
| P0C1X1 | 61  |
| P0C1X1 | 69  |
| P0C1X1 | 70  |
| P0C1X1 | 74  |

---

---

|        |     |
|--------|-----|
| P30754 | 21  |
| P30754 | 24  |
| P30754 | 27  |
| P30754 | 39  |
| P30754 | 53  |
| P30754 | 54  |
| P30754 | 72  |
| P30754 | 90  |
| P30754 | 93  |
| P30754 | 123 |
| P30754 | 128 |
| P30754 | 150 |
| P30754 | 161 |
| P30754 | 162 |
| P30754 | 164 |
| P30754 | 165 |
| P30754 | 174 |
| P30754 | 177 |
| P30754 | 180 |
| P30754 | 207 |
| P30754 | 216 |
| P30754 | 219 |
| P30754 | 228 |
| P30754 | 237 |
| P30754 | 243 |
| P30754 | 249 |
| P30754 | 255 |
| P30754 | 273 |
| P30754 | 276 |
| P30754 | 285 |
| P30754 | 291 |
| P30754 | 303 |
| P30754 | 306 |
| P30754 | 312 |
| P30754 | 321 |
| P30754 | 327 |
| P30754 | 339 |
| P30754 | 348 |
| P30754 | 366 |
| P30754 | 372 |
| P30754 | 375 |
| P30754 | 381 |
| P30754 | 387 |
| P30754 | 416 |
| P30754 | 417 |
| P30754 | 423 |
| P30754 | 429 |
| P30754 | 432 |
| P30754 | 453 |
| P30754 | 465 |
| P30754 | 483 |
| P30754 | 500 |
| P30754 | 503 |
| P30754 | 506 |
| P30754 | 513 |
| P30754 | 125 |
| P30754 | 533 |
| P30754 | 536 |
| P30754 | 540 |

---

---

|        |      |
|--------|------|
| P30754 | 551  |
| P30754 | 552  |
| P30754 | 561  |
| P30754 | 603  |
| P30754 | 621  |
| P30754 | 627  |
| P30754 | 645  |
| P30754 | 647  |
| P30754 | 648  |
| P30754 | 663  |
| P30754 | 708  |
| P30754 | 711  |
| P30754 | 714  |
| P30754 | 717  |
| P30754 | 723  |
| P30754 | 744  |
| P30754 | 759  |
| P30754 | 773  |
| P30754 | 774  |
| P30754 | 783  |
| P30754 | 792  |
| P30754 | 815  |
| P30754 | 816  |
| P30754 | 843  |
| P30754 | 849  |
| P30754 | 855  |
| P30754 | 861  |
| P30754 | 867  |
| P30754 | 888  |
| P30754 | 894  |
| P30754 | 903  |
| P30754 | 915  |
| P30754 | 945  |
| P30754 | 954  |
| P30754 | 963  |
| P30754 | 966  |
| P30754 | 984  |
| P30754 | 990  |
| P30754 | 1010 |
| P30754 | 1011 |
| P30754 | 1013 |
| P30754 | 1014 |
| P30754 | 1016 |
| P30754 | 1017 |
| P30754 | 1019 |
| P30754 | 1020 |
| Q24940 | 109  |
| Q24940 | 196  |
| C3VVN5 | 55   |
| C3VVN6 | 55   |
| P0C1W5 | 55   |
| P0C1W5 | 70   |
| P0C1W5 | 74   |
| P0C1W6 | 59   |
| P0C1W6 | 75   |
| P0C1W6 | 94   |
| Q8TEP8 | 1717 |
| P0C8W0 | 53   |
| P0C8W0 | 68   |

---

---

|        |     |
|--------|-----|
| P0C8W0 | 93  |
| P0C8W0 | 97  |
| P08252 | 67  |
| P08252 | 69  |
| P08252 | 71  |
| P08252 | 72  |
| P08252 | 74  |
| P08252 | 75  |
| P24091 | 67  |
| P24091 | 69  |
| Q7Z096 | 38  |
| Q7Z096 | 47  |
| Q7Z096 | 65  |
| Q9U3Z3 | 53  |
| O49519 | 67  |
| O49519 | 70  |
| Q9XF04 | 73  |
| Q9XF04 | 76  |
| P01523 | 56  |
| P01523 | 57  |
| P01523 | 67  |
| P58925 | 57  |
| P58925 | 67  |
| P0DKQ9 | 57  |
| P0DKQ9 | 67  |
| Q2I2Q5 | 58  |
| P0C1N1 | 64  |
| P0C1N5 | 55  |
| P0C1N5 | 65  |
| Q9BPJ7 | 65  |
| P56529 | 52  |
| P56529 | 53  |
| P56529 | 64  |
| P58846 | 62  |
| P0C8V6 | 57  |
| P0C8V6 | 65  |
| P0C8V5 | 57  |
| P0C8V5 | 65  |
| D5KR58 | 49  |
| P01522 | 49  |
| P01522 | 55  |
| P01522 | 66  |
| P0C8V9 | 55  |
| P0C8V9 | 67  |
| P28880 | 55  |
| P58913 | 57  |
| P58913 | 65  |
| Q9XZK5 | 65  |
| P56633 | 49  |
| P86289 | 6   |
| P86289 | 12  |
| P86289 | 15  |
| P86289 | 30  |
| P86289 | 39  |
| P86289 | 54  |
| P86289 | 60  |
| P86289 | 84  |
| P86289 | 90  |
| P86289 | 107 |

---

---

|        |      |
|--------|------|
| P0C2W8 | 128  |
| P0C2W8 | 131  |
| P0C2W8 | 173  |
| P0C2W8 | 182  |
| P0C2W8 | 185  |
| P0C2W8 | 212  |
| P0C2W8 | 215  |
| P0C2W8 | 227  |
| P0C2W8 | 242  |
| P0C2W8 | 248  |
| P0C2W8 | 251  |
| P0C2W8 | 266  |
| P0C2W8 | 290  |
| P0C2W8 | 292  |
| P0C2W8 | 299  |
| P0C2W8 | 314  |
| P0C2W8 | 320  |
| P0C2W8 | 323  |
| P0C2W8 | 335  |
| P0C2W8 | 362  |
| P0C2W8 | 368  |
| P0C2W8 | 374  |
| P0C2W8 | 383  |
| P0C2W8 | 386  |
| P0C2W8 | 422  |
| P0C2W8 | 530  |
| P0C2W8 | 611  |
| P0C2W8 | 617  |
| P0C2W8 | 710  |
| P0C2W8 | 716  |
| P0C2W8 | 758  |
| P0C2W8 | 764  |
| P0C2W8 | 767  |
| P0C2W8 | 812  |
| P0C2W8 | 815  |
| P0C2W8 | 863  |
| P0C2W8 | 869  |
| P0C2W8 | 887  |
| P0C2W8 | 890  |
| P0C2W8 | 959  |
| P0C2W8 | 962  |
| P0C2W8 | 965  |
| P0C2W8 | 998  |
| P0C2W8 | 1001 |
| P0C2W8 | 1004 |
| P02457 | 179  |
| P02457 | 182  |
| P02457 | 185  |
| P02457 | 194  |
| P02457 | 197  |
| P02457 | 200  |
| P02457 | 215  |
| P02457 | 230  |
| P02457 | 236  |
| P02457 | 245  |
| P02457 | 251  |
| P02457 | 269  |
| P02457 | 278  |
| P02457 | 281  |

---

---

|        |     |
|--------|-----|
| P02457 | 287 |
| P02457 | 296 |
| P02457 | 302 |
| P02457 | 317 |
| P02457 | 323 |
| P02457 | 332 |
| P02457 | 335 |
| P02457 | 362 |
| P02457 | 365 |
| P02457 | 377 |
| P02457 | 383 |
| P02457 | 392 |
| P02457 | 398 |
| P02457 | 401 |
| P02457 | 416 |
| P02457 | 425 |
| P02457 | 428 |
| P02457 | 440 |
| P02457 | 449 |
| P02457 | 464 |
| P02457 | 470 |
| P02457 | 479 |
| P02457 | 485 |
| P02457 | 497 |
| P02457 | 503 |
| P02457 | 512 |
| P02457 | 518 |
| P02457 | 524 |
| P02457 | 533 |
| P02457 | 536 |
| P02457 | 545 |
| P02457 | 554 |
| P02457 | 560 |
| P02457 | 572 |
| P02457 | 581 |
| P02457 | 584 |
| P02457 | 590 |
| P02457 | 593 |
| P02457 | 611 |
| P02457 | 629 |
| P02457 | 635 |
| P02457 | 641 |
| P02457 | 647 |
| P02457 | 653 |
| P02457 | 659 |
| P02457 | 671 |
| P02457 | 680 |
| P02457 | 692 |
| P02457 | 704 |
| P02457 | 707 |
| P02457 | 713 |
| P02457 | 719 |
| P02457 | 728 |
| P02457 | 737 |
| P02457 | 746 |
| P02457 | 761 |
| P02457 | 767 |
| P02457 | 776 |
| P02457 | 788 |

---

---

|        |      |
|--------|------|
| P02457 | 794  |
| P02457 | 797  |
| P02457 | 806  |
| P02457 | 812  |
| P02457 | 830  |
| P02457 | 839  |
| P02457 | 848  |
| P02457 | 860  |
| P02457 | 866  |
| P02457 | 875  |
| P02457 | 884  |
| P02457 | 887  |
| P02457 | 908  |
| P02457 | 911  |
| P02457 | 917  |
| P02457 | 920  |
| P02457 | 926  |
| P02457 | 935  |
| P02457 | 953  |
| P02457 | 962  |
| P02457 | 965  |
| P02457 | 971  |
| P02457 | 986  |
| P02457 | 992  |
| P02457 | 998  |
| P02457 | 1007 |
| P02457 | 1013 |
| P02457 | 1034 |
| P02457 | 1037 |
| P02457 | 1040 |
| P02457 | 1067 |
| P02457 | 1109 |
| P02457 | 1112 |
| P02457 | 1115 |
| P02457 | 1133 |
| P02457 | 1148 |
| P02457 | 1153 |
| P02457 | 1154 |
| P02457 | 1169 |
| P02457 | 1172 |
| P02457 | 1175 |
| P02457 | 1178 |
| P02453 | 1163 |
| P08123 | 420  |
| P08123 | 441  |
| P08123 | 444  |
| P86290 | 6    |
| P86290 | 12   |
| P86290 | 33   |
| P56711 | 76   |
| P02459 | 212  |
| P02459 | 218  |
| P02459 | 230  |
| P02459 | 233  |
| P02459 | 245  |
| P02459 | 248  |
| P02459 | 251  |
| P02459 | 260  |
| P02459 | 269  |

---



---

|        |      |
|--------|------|
| P02459 | 278  |
| P02459 | 281  |
| P02459 | 284  |
| P02459 | 293  |
| P02459 | 305  |
| P02459 | 314  |
| P02459 | 320  |
| P02459 | 329  |
| P02459 | 350  |
| P02459 | 356  |
| P02459 | 365  |
| P02459 | 368  |
| P02459 | 371  |
| P02459 | 395  |
| P02459 | 398  |
| P02459 | 401  |
| P02459 | 410  |
| P02459 | 416  |
| P02459 | 425  |
| P02459 | 431  |
| P02459 | 434  |
| P02459 | 440  |
| P02459 | 458  |
| P02459 | 473  |
| P02459 | 482  |
| P02459 | 497  |
| P02459 | 506  |
| P02459 | 512  |
| P02459 | 518  |
| P02459 | 530  |
| P02459 | 551  |
| P02459 | 557  |
| P02459 | 566  |
| P02459 | 581  |
| P02459 | 587  |
| P02459 | 590  |
| P02459 | 599  |
| P02459 | 605  |
| P02459 | 614  |
| P02459 | 623  |
| P02459 | 626  |
| P02459 | 632  |
| P02459 | 644  |
| P02459 | 659  |
| P02459 | 668  |
| P02459 | 670  |
| P02459 | 671  |
| P02459 | 674  |
| P02459 | 907  |
| P02459 | 1144 |
| P02459 | 1186 |
| P02459 | 1201 |
| P02459 | 1207 |
| P02459 | 1213 |
| P85154 | 176  |
| P85154 | 182  |
| P85154 | 284  |
| P85154 | 293  |
| P85154 | 410  |

---

---

|        |      |
|--------|------|
| P85154 | 473  |
| P85154 | 479  |
| P85154 | 491  |
| P85154 | 497  |
| P85154 | 503  |
| P85154 | 599  |
| P85154 | 605  |
| P85154 | 704  |
| P85154 | 710  |
| P85154 | 728  |
| P85154 | 731  |
| P85154 | 761  |
| P85154 | 806  |
| P85154 | 815  |
| P85154 | 824  |
| P85154 | 902  |
| P05539 | 602  |
| P05539 | 839  |
| P05539 | 1076 |
| P05539 | 1118 |
| P05539 | 1133 |
| P05539 | 1139 |
| P05539 | 1145 |
| Q28084 | 232  |
| Q28084 | 238  |
| P20908 | 570  |
| P20908 | 576  |
| P20908 | 621  |
| P20908 | 639  |
| P20908 | 648  |
| P20908 | 654  |
| P20908 | 657  |
| P20908 | 675  |
| P20908 | 678  |
| P20908 | 680  |
| P20908 | 686  |
| P20908 | 690  |
| P20908 | 696  |
| P20908 | 705  |
| P20908 | 717  |
| P20908 | 720  |
| P20908 | 726  |
| P20908 | 732  |
| P20908 | 750  |
| P20908 | 756  |
| P20908 | 762  |
| P20908 | 765  |
| P20908 | 771  |
| P20908 | 780  |
| P20908 | 789  |
| P20908 | 816  |
| P20908 | 834  |
| P20908 | 861  |
| P20908 | 870  |
| P20908 | 873  |
| P20908 | 876  |
| P20908 | 888  |
| P20908 | 891  |
| P20908 | 903  |

---

---

|        |      |
|--------|------|
| P20908 | 906  |
| P20908 | 930  |
| P20908 | 945  |
| P20908 | 1017 |
| P20908 | 1020 |
| P20908 | 1023 |
| P20908 | 1029 |
| P20908 | 1221 |
| P20908 | 1224 |
| P20908 | 1467 |
| P20908 | 1470 |
| P05997 | 290  |
| P05997 | 293  |
| P05997 | 296  |
| P05997 | 611  |
| P05997 | 617  |
| P05997 | 919  |
| P05997 | 1156 |
| P12111 | 2100 |
| P12111 | 2206 |
| P12111 | 2239 |
| P12111 | 2316 |
| P12111 | 2319 |
| Q02388 | 2167 |
| Q02388 | 2176 |
| Q02388 | 2185 |
| Q02388 | 2188 |
| Q02388 | 2664 |
| Q02388 | 2667 |
| Q02388 | 2673 |
| P12108 | 158  |
| P12108 | 178  |
| P08125 | 453  |
| P08125 | 456  |
| A6YR20 | 65   |
| A6YR20 | 82   |
| A6YR21 | 65   |
| A6YR21 | 82   |
| P25508 | 6    |
| P25508 | 9    |
| P25508 | 12   |
| P25508 | 18   |
| P25508 | 24   |
| P25508 | 27   |
| P25508 | 30   |
| P25508 | 42   |
| P25508 | 51   |
| P25508 | 54   |
| P25508 | 65   |
| P25508 | 74   |
| P25508 | 77   |
| P25508 | 80   |
| Q05707 | 1467 |
| Q05707 | 1470 |
| Q05707 | 1482 |
| Q05707 | 1497 |
| Q05707 | 1503 |
| Q05707 | 1517 |
| Q05707 | 1520 |

---

---

|        |      |
|--------|------|
| Q05707 | 1532 |
| Q05707 | 1538 |
| Q05707 | 1544 |
| Q05707 | 1550 |
| Q05707 | 1556 |
| Q05707 | 1565 |
| Q05707 | 1568 |
| Q05707 | 1574 |
| Q05707 | 1577 |
| Q05707 | 1580 |
| Q05707 | 1595 |
| Q05707 | 1598 |
| Q05707 | 1643 |
| Q05707 | 1656 |
| Q05707 | 1659 |
| Q05707 | 1662 |
| Q05707 | 1665 |
| Q05707 | 1668 |
| Q05707 | 1674 |
| Q05707 | 1677 |
| Q05707 | 1680 |
| Q05707 | 1686 |
| Q05707 | 1689 |
| Q05707 | 1704 |
| Q05707 | 1715 |
| Q05707 | 1726 |
| Q05707 | 1729 |
| Q05707 | 1732 |
| Q05707 | 1735 |
| Q05707 | 1741 |
| Q05707 | 1747 |
| Q05707 | 1756 |
| P58922 | 61   |
| B2KPN7 | 64   |
| Q6PSU2 | 67   |
| Q6PSU2 | 74   |
| Q6PSU2 | 86   |
| P23805 | 78   |
| P23805 | 96   |
| P23805 | 108  |
| P23805 | 111  |
| P23805 | 129  |
| P23805 | 132  |
| P23805 | 147  |
| P23805 | 153  |
| P23805 | 171  |
| P23805 | 195  |
| P58787 | 57   |
| P58786 | 57   |
| P29602 | 115  |
| P29602 | 116  |
| P29602 | 117  |
| P29602 | 121  |
| P29602 | 122  |
| P29602 | 127  |
| P29602 | 128  |
| P29602 | 129  |
| P29602 | 132  |
| P29602 | 133  |

---

---

|        |     |
|--------|-----|
| P29602 | 134 |
| P29602 | 136 |
| P58924 | 55  |
| P58808 | 60  |
| P69765 | 49  |
| Q9BPG6 | 63  |
| P81755 | 63  |
| P58809 | 60  |
| D2Y171 | 50  |
| D2Y171 | 58  |
| D2Y171 | 62  |
| D2Y171 | 64  |
| D2Y168 | 57  |
| P86500 | 24  |
| P86500 | 43  |
| P86500 | 83  |
| C4PWC4 | 55  |
| P0CE31 | 55  |
| P0CE29 | 56  |
| P0CE27 | 56  |
| P0CE30 | 56  |
| B4YSU8 | 51  |
| P00064 | 79  |
| P00057 | 79  |
| P15502 | 34  |
| P15502 | 65  |
| P15502 | 67  |
| P15502 | 88  |
| P15502 | 116 |
| P15502 | 156 |
| P15502 | 167 |
| P15502 | 170 |
| P15502 | 177 |
| P15502 | 190 |
| P15502 | 283 |
| P15502 | 286 |
| P15502 | 290 |
| P15502 | 327 |
| P15502 | 342 |
| P15502 | 347 |
| P15502 | 352 |
| P15502 | 355 |
| P15502 | 360 |
| P15502 | 415 |
| P15502 | 421 |
| P15502 | 427 |
| P15502 | 465 |
| P15502 | 467 |
| P15502 | 481 |
| P15502 | 522 |
| P15502 | 550 |
| P15502 | 580 |
| P15502 | 589 |
| P15502 | 598 |
| P15502 | 607 |
| P15502 | 646 |
| P15502 | 677 |
| P15502 | 769 |
| P15502 | 772 |

---

---

|        |     |
|--------|-----|
| O97939 | 547 |
| O75636 | 50  |
| O75636 | 53  |
| O75636 | 59  |
| O75636 | 65  |
| O75636 | 68  |
| O75636 | 77  |
| Q15485 | 77  |
| Q15485 | 80  |
| Q15485 | 86  |
| P02671 | 565 |
| A1X158 | 43  |
| A1X158 | 53  |
| A1X158 | 65  |
| A1X158 | 72  |
| A1X158 | 73  |
| A1X158 | 85  |
| A1X158 | 92  |
| A1X158 | 93  |
| A1X158 | 105 |
| A1X158 | 112 |
| A1X158 | 113 |
| A1X158 | 125 |
| A1X158 | 135 |
| A1X158 | 145 |
| A1X158 | 155 |
| A1X158 | 165 |
| A1X158 | 175 |
| A1X158 | 185 |
| A1X158 | 195 |
| A1X158 | 202 |
| A1X158 | 203 |
| A1X158 | 215 |
| A1X158 | 225 |
| A1X158 | 235 |
| A1X158 | 245 |
| A1X158 | 255 |
| A1X158 | 262 |
| A1X158 | 263 |
| A1X158 | 275 |
| A1X158 | 282 |
| A1X158 | 283 |
| A1X158 | 295 |
| A1X158 | 302 |
| A1X158 | 303 |
| A1X158 | 315 |
| A1X158 | 325 |
| A1X158 | 335 |
| A1X158 | 345 |
| A1X158 | 352 |
| A1X158 | 353 |
| A1X158 | 363 |
| A1X158 | 375 |
| A1X158 | 382 |
| A1X158 | 383 |
| A1X158 | 395 |
| A1X158 | 402 |
| A1X158 | 403 |
| A1X158 | 415 |

---

---

|        |     |
|--------|-----|
| A1X158 | 425 |
| A1X158 | 435 |
| Q25460 | 89  |
| Q25460 | 93  |
| Q25460 | 115 |
| Q25460 | 145 |
| Q25460 | 149 |
| Q25460 | 155 |
| Q25460 | 159 |
| Q25460 | 175 |
| Q25460 | 179 |
| Q25460 | 185 |
| Q25460 | 189 |
| Q25460 | 195 |
| Q25460 | 199 |
| Q25460 | 211 |
| Q25460 | 221 |
| Q25460 | 225 |
| Q25460 | 237 |
| Q25460 | 241 |
| Q25460 | 247 |
| Q25460 | 251 |
| Q25460 | 257 |
| Q25460 | 261 |
| Q25460 | 285 |
| Q25460 | 289 |
| Q25460 | 295 |
| Q25460 | 299 |
| Q25460 | 305 |
| Q25460 | 309 |
| Q25460 | 315 |
| Q25460 | 319 |
| Q25460 | 325 |
| Q25460 | 329 |
| Q25460 | 335 |
| Q25460 | 339 |
| Q25460 | 351 |
| Q25460 | 361 |
| Q25460 | 365 |
| Q25460 | 371 |
| Q25460 | 375 |
| Q25460 | 387 |
| Q25460 | 391 |
| Q25460 | 397 |
| Q25460 | 401 |
| Q25460 | 407 |
| Q25460 | 411 |
| Q25460 | 423 |
| Q25460 | 433 |
| Q25460 | 437 |
| Q25460 | 443 |
| Q25460 | 447 |
| Q25460 | 459 |
| Q25460 | 469 |
| Q25460 | 479 |
| Q25460 | 483 |
| Q25460 | 519 |
| Q25460 | 523 |
| Q25460 | 543 |

---

---

|        |     |
|--------|-----|
| Q25460 | 549 |
| Q25460 | 559 |
| Q25460 | 563 |
| Q25460 | 569 |
| Q25460 | 573 |
| Q25460 | 579 |
| Q25460 | 583 |
| Q25460 | 595 |
| Q25460 | 605 |
| Q25460 | 609 |
| Q25460 | 615 |
| Q25460 | 619 |
| Q25460 | 625 |
| Q25460 | 629 |
| Q25460 | 635 |
| Q25460 | 645 |
| Q25460 | 649 |
| Q25460 | 659 |
| Q25460 | 665 |
| Q25460 | 669 |
| Q25460 | 675 |
| Q25460 | 679 |
| Q25460 | 701 |
| Q25460 | 705 |
| Q25460 | 711 |
| Q25460 | 715 |
| Q25460 | 721 |
| Q25460 | 725 |
| Q25460 | 737 |
| Q25460 | 753 |
| Q25460 | 757 |
| Q25460 | 763 |
| Q25460 | 767 |
| Q25460 | 773 |
| Q25460 | 777 |
| Q25460 | 813 |
| Q25460 | 817 |
| Q25460 | 833 |
| Q25460 | 837 |
| Q25460 | 867 |
| A1X159 | 42  |
| A1X159 | 43  |
| A1X159 | 53  |
| A1X159 | 65  |
| A1X159 | 72  |
| A1X159 | 73  |
| A1X159 | 85  |
| A1X159 | 92  |
| A1X159 | 93  |
| A1X159 | 105 |
| A1X159 | 112 |
| A1X159 | 113 |
| A1X159 | 125 |
| A1X159 | 132 |
| A1X159 | 133 |
| A1X159 | 145 |
| A1X159 | 155 |
| A1X159 | 162 |
| A1X159 | 163 |

---



---

|        |     |
|--------|-----|
| A1X159 | 175 |
| A1X159 | 185 |
| A1X159 | 195 |
| A1X159 | 205 |
| A1X159 | 215 |
| A1X159 | 222 |
| A1X159 | 223 |
| A1X159 | 235 |
| A1X159 | 242 |
| A1X159 | 243 |
| A1X159 | 255 |
| A1X159 | 262 |
| A1X159 | 263 |
| A1X159 | 275 |
| A1X159 | 285 |
| A1X159 | 295 |
| A1X159 | 305 |
| Q9Y2N7 | 492 |
| Q16665 | 402 |
| Q16665 | 564 |
| Q9GQV7 | 26  |
| Q9GQV7 | 59  |
| Q9GQV7 | 83  |
| Q93WP7 | 42  |
| Q93WP7 | 43  |
| Q93WP7 | 45  |
| Q93WP7 | 49  |
| Q93WP7 | 50  |
| Q93WP7 | 149 |
| Q93WP7 | 150 |
| Q93WP7 | 152 |
| Q93WP8 | 42  |
| Q93WP8 | 43  |
| Q93WP8 | 45  |
| Q93WP8 | 49  |
| Q93WP8 | 50  |
| Q93WP8 | 150 |
| Q93WP8 | 151 |
| Q93WP8 | 153 |
| Q7XAD0 | 51  |
| Q7XAD0 | 55  |
| Q7XAD0 | 56  |
| Q7XAD0 | 57  |
| Q7XAD0 | 58  |
| Q7XAD0 | 63  |
| Q7XAD0 | 79  |
| Q7XAD0 | 80  |
| Q7XAD0 | 82  |
| Q7XAD0 | 119 |
| Q7XAD0 | 120 |
| Q7XAD0 | 121 |
| Q7XAD0 | 122 |
| O14920 | 191 |
| P01042 | 383 |
| P14618 | 403 |
| P14618 | 408 |
| P11226 | 47  |
| P11226 | 73  |
| P11226 | 79  |

---

---

|        |     |
|--------|-----|
| P11226 | 82  |
| P11226 | 88  |
| P08661 | 43  |
| P08661 | 58  |
| P08661 | 69  |
| P08661 | 78  |
| P08661 | 81  |
| P19999 | 43  |
| P19999 | 61  |
| P19999 | 67  |
| P19999 | 73  |
| P19999 | 78  |
| P01525 | 10  |
| P01526 | 10  |
| Q9BPB1 | 58  |
| P0CJ21 | 58  |
| Q9BPB2 | 49  |
| Q9BPB2 | 54  |
| Q9BPB4 | 49  |
| Q9BPB4 | 54  |
| P02820 | 60  |
| P84349 | 60  |
| P04640 | 58  |
| P04925 | 44  |
| P80760 | 11  |
| P80760 | 16  |
| P80760 | 21  |
| Q941C7 | 63  |
| Q941C7 | 64  |
| P00877 | 104 |
| P00877 | 151 |
| P08427 | 30  |
| P08427 | 33  |
| P08427 | 36  |
| P08427 | 42  |
| P08427 | 54  |
| P08427 | 57  |
| P08427 | 63  |
| P08427 | 67  |
| P08427 | 70  |
| P08427 | 76  |
| P35248 | 77  |
| P35248 | 95  |
| P35248 | 170 |
| P35248 | 176 |
| Q557E4 | 143 |
| P52285 | 143 |
| A1EC31 | 123 |
| A1EC31 | 126 |
| Q9Y4R8 | 374 |
| Q9Y4R8 | 419 |
| Q9Y4R8 | 422 |
| P83455 | 56  |
| P69930 | 56  |
| P69929 | 39  |
| P69929 | 73  |
| P69929 | 107 |
| P69929 | 141 |
| P69929 | 175 |

---

---

|        |     |
|--------|-----|
| P69929 | 209 |
| P69928 | 29  |
| Q0VKG8 | 56  |
| P42849 | 113 |
| Q8T018 | 165 |
| Q8T018 | 168 |
| Q8T018 | 171 |
| Q8T018 | 174 |
| Q8T018 | 179 |
| Q8T018 | 185 |
| Q8T018 | 188 |
| Q805R9 | 20  |
| Q805R9 | 23  |
| Q805R9 | 26  |
| Q805R9 | 29  |
| Q805R9 | 38  |
| Q805R9 | 41  |
| Q805R9 | 44  |
| Q805R9 | 47  |
| Q80BK4 | 19  |
| Q80BK4 | 20  |
| Q80BK4 | 22  |
| Q80BK4 | 23  |
| Q80BK4 | 25  |
| Q80BK4 | 26  |
| Q80BK4 | 28  |
| Q80BK4 | 29  |
| Q80BK4 | 31  |
| Q80BK4 | 32  |
| Q80BK4 | 34  |
| Q80BK4 | 35  |
| Q80BK4 | 37  |
| Q80BK4 | 38  |
| Q80BK4 | 40  |
| Q80BK4 | 41  |
| Q80BK4 | 43  |
| Q80BK4 | 44  |
| Q80BK4 | 46  |
| Q80BK4 | 47  |

---
