# Supplementary material for: iHyd-PseAAC: Predicting Hydroxyproline and Hydroxylysine in Proteins by Incorporating Dipeptide Position-Specific Propensity into Pseudo Amino Acid Composition
Source: MDPI journal article supplement (doi:10.3390/ijms15057594), 2014-05-05
Supplement: s1 [file s1]

# Supplementary Information

**Supplementary Information S1.** The positive dataset  $S_{\text{Hyp}}^+$  and negative dataset  $S_{\text{Hyp}}^-$  contain 636 hydroxyproline peptide fragments and 2699 non-hydroxyproline peptide fragments, respectively. None of the sequences included has  $\geq 80\%$  pairwise sequence identity with any other in a same subset. See the text of the paper for further explanation.

## Positive dataset

| UniProt ID | Site | Sequence                |
|------------|------|-------------------------|
| P08427     | 63   | PGPMGP <b>P</b> GGMPGL  |
| P02457     | 848  | AGZVGA <b>P</b> GPKGAR  |
| P02457     | 245  | QGARGL <b>P</b> GTAGLP  |
| Q93WP8     | 151  | RKPLSP <b>P</b> SPKPAD  |
| Q7M1I4     | 8    | HYSYSS <b>P</b> PPPPVV  |
| Q15848     | 76   | DPGLIG <b>P</b> KGDIGE  |
| P02457     | 464  | RGARGE <b>P</b> GPAGLP  |
| P02457     | 572  | AGVMGF <b>P</b> GPKGAA  |
| Q9BPB2     | 54   | CPDYTD <b>P</b> CSHAHE  |
| Q05707     | 1520 | QGMPGM <b>P</b> GEEKGEK |
| P05997     | 919  | SAGRVG <b>P</b> PGPAGA  |
| P30754     | 429  | PGKNGA <b>P</b> GEPGAH  |
| P30754     | 416  | LQGRAG <b>P</b> PGARGE  |
| P84698     | 21   | ECCKGY <b>P</b> CVNKAC  |
| Q24940     | 196  | ETESSY <b>P</b> YTAVEG  |
| P02457     | 332  | TGPAGP <b>P</b> GFPGAA  |
| P01523     | 57   | RDCCTP <b>P</b> KKCKDR  |
| P30754     | 285  | KGSSGP <b>P</b> GDVGAP  |
| B4YSU8     | 51   | GDSCNE <b>P</b> AGELCC  |
| P58782     | 13   | PNAACH <b>P</b> CGCKVG  |
| P23805     | 96   | NGFVGE <b>P</b> GPKGDT  |
| P02820     | 60   | DHWLGA <b>P</b> APYPDP  |
| P0C8S5     | 28   | LPPNLR <b>P</b> KFKE@@  |
| P02457     | 692  | RGANGA <b>P</b> GNDGAK  |
| P85154     | 503  | PGEFGL <b>P</b> GPAQPR  |
| P50982     | 46   | LTARRD <b>P</b> CCYHPT  |
| P30754     | 984  | RGSQGP <b>P</b> GKDGQP  |
| P81755     | 63   | WCCTAA <b>P</b> LTGR@@  |
| P02457     | 197  | QGPPGE <b>P</b> GEPGAS  |
| P0C1X1     | 70   | CTYSCP <b>P</b> KRKPGR  |
| Q9LYF6     | 29   | QSEAPA <b>P</b> SPTSGS  |
| Q9ZT16     | 34   | PTATPP <b>P</b> ATPPPV  |
| Q24940     | 109  | ANNRAV <b>P</b> DKIDWR  |
| Q25460     | 89   | PTYKPK <b>P</b> SYPTY   |
| P15502     | 360  | VPGAGI <b>P</b> GAAVPG  |
| Q05707     | 1735 | PGPPGS <b>P</b> GPRGPP  |
| P30754     | 381  | PGSDGR <b>P</b> GKDGRP  |
| P02457     | 962  | RGERGF <b>P</b> GLPGPS  |
| P30754     | 966  | SGPPGA <b>P</b> GPRGAR  |
| Q7XAD0     | 55   | RTPYKT <b>P</b> PPPTSS  |
| P01522     | 55   | PGSSCS <b>P</b> TSYNCC  |
| P0C1X1     | 69   | MCTYSC <b>P</b> PKRKPG  |
| P0CG45     | 15   | KKHCPA <b>P</b> ACKYKP  |
| P01522     | 66   | CCRSCN <b>P</b> YTKRCY  |
| Q16665     | 564  | DLEMLA <b>P</b> YIPMDD  |
| P02457     | 998  | PGLAGP <b>P</b> GEGARE  |
| P30754     | 603  | RGENGL <b>P</b> GPSGLA  |
| P56633     | 49   | STRCRI <b>P</b> NQKCFQ  |

---

|        |      |                 |
|--------|------|-----------------|
| P0C1W5 | 70   | LNRVCGPMCCPAS   |
| P15502 | 427  | PGVGGVPGVGGVP   |
| P0C2W8 | 323  | TGLPGPPGERGGP   |
| Q05707 | 1704 | KGEKGNPGVGTQG   |
| P30754 | 339  | SGAMGI PGEKGPS  |
| P0CG45 | 21   | PACKYKPCCKS@@   |
| P02745 | 73   | KGDQGE PGPSGNP  |
| P85065 | 14   | TPGCTS PGGGSNC  |
| P85009 | 6    | @GCCSDPRCKHQC   |
| P82439 | 6    | @NYQYSPPPPKK    |
| P30754 | 816  | KGDGGP PGPSGDR  |
| P30754 | 128  | GPGPAGPSGPIGP   |
| P0C349 | 18   | SSRECRPQHCC@@   |
| P23805 | 171  | PGETGAPGRAGVT   |
| P0CH20 | 5    | @@YGNFPTCSETG   |
| Q05707 | 1662 | PGEPRPGSPGAP    |
| Q7XAD0 | 82   | VLPPPSPKTDPII   |
| Q93WP8 | 49   | PSPASSPSKEVS    |
| P85154 | 902  | HGNRGE PGPAHSV  |
| Q6PSU2 | 67   | GRDPYS PSQDPYS  |
| P07550 | 395  | GHQGTVPSDNIDS   |
| Q05707 | 1580 | PGTPGVPGITGSM   |
| P02457 | 497  | AGPKGP PGERGSP  |
| Q05707 | 1756 | QGSPGQPGYCDPS   |
| P02457 | 971  | PGPSGE PGKQGPS  |
| P02457 | 1178 | PGPPGP PGPPSGG  |
| Q05707 | 1656 | RTVQGP PGEPRP   |
| P15502 | 190  | GAFAGI PGVGPFG  |
| Q7M1I4 | 20   | VSSPPPYYYYSP    |
| P0C1N5 | 55   | AVRDCCPLPACPF   |
| Q05707 | 1538 | PGPQGI PGGVGSP  |
| P02457 | 704  | KGDAGA PGAPGNE  |
| Q4ZJN1 | 64   | PGHPGG PGKDGR   |
| P08252 | 69   | CPGGPTPTPPTPP   |
| P08427 | 57   | KGDGPP PGPMGPP  |
| C3VVN6 | 55   | ECQVDT PGSSWGK  |
| P29602 | 133  | PPPVMP PPSPS@@  |
| P58925 | 67   | RSRQCKPHRCCGR   |
| Q9M0S4 | 32   | PAPTRS PLPSPAQ  |
| P58913 | 57   | KEACYA PGTF CGI |
| P30754 | 708  | QGEIGL PGSPGQP  |
| P02745 | 39   | KGEAGR PGRGRP   |
| P58923 | 10   | GRDSRC PPVCCMG  |
| P01523 | 67   | KDRQCK PQRCCAG  |
| P02457 | 440  | TGAKGE PGPAQVQ  |
| P30754 | 216  | AGENGH PGMPGMD  |
| Q02388 | 2167 | AGPEGK PGLQGPR  |
| P29602 | 116  | ATVSMP PPSPP    |
| P60245 | 14   | GSCRPF PGCYNAL  |
| P86289 | 60   | PGPAGA PGDKGEA  |
| P00877 | 104  | IAYVAY PIDLFEE  |
| P29602 | 117  | TVSMPP PSSPPS   |
| P30754 | 711  | IGLPGS PGQPGLP  |
| P02457 | 746  | KGADGA PGKDGLR  |
| P30754 | 375  | AGLPGN PGSDGRP  |
| P02747 | 99   | PGMPGV PGPMGIP  |
| Q4ZJN1 | 58   | KGDAGE PGHPGGP  |
| Q93WP8 | 50   | SPASSP PSKEVSN  |
| Q7Z096 | 65   | LGGICK PSTSWIG  |

---

---

|        |      |                    |
|--------|------|--------------------|
| P30754 | 536  | ATGPAGPTGSPGV      |
| Q9ZT16 | 24   | SALAQAPAPTPTA      |
| P0C1W5 | 55   | DCQVSTPGSKWGR      |
| P02457 | 524  | PGEAGLPGAKGLT      |
| Q15848 | 91   | VPGAEGPRGFPGI      |
| P30754 | 291  | PGDVGA PGHAGEA     |
| P02457 | 659  | PGNAGAPGPAGAR      |
| P82439 | 8    | YQYSPPPPPKKKY      |
| P30754 | 39   | QGLRGE PGDSGPM     |
| P30754 | 1013 | RSGPPGPGPPGP       |
| P02457 | 581  | KGAAGEPGKPGER      |
| P0C8V5 | 65   | TFCGIK PGLCCSA     |
| P86289 | 39   | KGVQGP GPGQGPR     |
| P02457 | 986  | SGERGP GPGMGPP     |
| P30754 | 366  | QGNQGT PGIAGLP     |
| Q9SJY7 | 24   | SCLAQAPAPAPTT      |
| B2KPN7 | 64   | YHAHPK P NSFCTL    |
| Q05707 | 1497 | RGEIGL GPGQGPP     |
| P82439 | 7    | NYQYSP PPPPKKK     |
| Q25460 | 437  | AKPSYP PSYKAKP     |
| Q0VKG8 | 56   | ERRDRP PSWIPK@     |
| P30754 | 894  | PGAAGP PGDRGER     |
| P30754 | 306  | RGSPGS GPGAGSP     |
| P86289 | 84   | RGSAGP PGATGFP     |
| Q7XAD0 | 63   | PPTSSS PTHQEIV     |
| P29602 | 115  | NATVSM PPPSSSP     |
| Q7M1I4 | 17   | PPVVSS PPPPYYY     |
| Q7M1I4 | 19   | VVSSPP P P Y Y Y S |
| P19999 | 67   | PGKLGP PGSVGAP     |
| Q25460 | 867  | AKTSYP PAYKPTN     |
| P85154 | 806  | RGERGL PGVAGAV     |
| P30754 | 945  | KGWTGL PGLQGLQ     |
| P86289 | 107  | AGPAGP GPGAGAR     |
| P30754 | 162  | DGLAGP GPGPGPI     |
| P02747 | 93   | NGPMGP PGMPGVP     |
| Q9ZT16 | 28   | QAPAPT PTATPPP     |
| O82337 | 31   | GAQSLA PAPAPTS     |
| D2Y171 | 62   | EGPGRD PAPCCQH     |
| Q93WP8 | 150  | NRKPLS PPSPKPA     |
| Q9M0S4 | 24   | SAIAQA GGPAPTR     |
| Q93WP8 | 153  | PLSPPS PKPADGQ     |
| P86289 | 6    | @GATGA PGIAGAP     |
| P08252 | 74   | TPTPPT PPGGGDL     |
| P55963 | 7    | GCCGSY PNAACHP     |
| P0CG45 | 13   | PPKKHC PAPACKY     |
| Q9ZT16 | 32   | PTPTAT PPPATPP     |
| P86290 | 6    | @GSNGE PGSAGPP     |
| P80762 | 8    | MYLPPV PPPPVVP     |
| P12108 | 158  | PGKPGP PGHIQGV     |
| P0C2W8 | 869  | PGRDGS PGPKGDR     |
| P30754 | 432  | NGAPGE PGAHGEQ     |
| P12111 | 2319 | RGFPGY PGPKGPN     |
| P29602 | 127  | PPSSVM PPPVMPP     |
| P12111 | 2206 | FGRRGP PGA KGNK    |
| P02457 | 179  | AGPRGL PGPPGAP     |
| P02457 | 428  | SGEPGA PGNGKGT     |
| P30754 | 423  | PGARGE PGKNGAP     |
| P0CH13 | 14   | NCDVFR PYRCCSG     |
| P85153 | 420  | PGANGN GPGAGPP     |

---

---

|        |      |         |   |   |   |   |   |   |   |
|--------|------|---------|---|---|---|---|---|---|---|
| B2CS62 | 8    | RVENKC  | P | H | T | V | C | C | D |
| Q05707 | 1677 | QGPPGT  | P | G | F | P | G | N | A |
| P02457 | 1040 | PGAPGA  | P | G | A | P | G | P | V |
| Q4ZJN1 | 31   | QGHSGI  | P | G | N | P | G | H | N |
| P30754 | 648  | QGQPGP  | P | G | D | A | G | P | A |
| Q9SJY7 | 26   | LAQAPA  | P | A | P | T | T | V | T |
| P02457 | 593  | RGAPGP  | P | G | A | V | G | A | A |
| P02457 | 194  | QGFQGP  | P | G | E | P | G | E | P |
| Q3Y5Z3 | 39   | GWMAGI  | P | G | H | P | G | H | N |
| Q9LVC0 | 36   | DAPAPS  | P | T | S | D | A | S | S |
| P30754 | 93   | GGMPGM  | P | G | P | K | G | H | R |
| Q9C5S0 | 26   | GQAPTS  | P | P | T | A | T | P | A |
| P58916 | 7    | CKGKGA  | P | C | T | R | L | M | Y |
| P02457 | 1109 | SGLQGP  | P | G | P | P | G | A | P |
| P15502 | 347  | VPGVGV  | P | G | A | G | I | P | V |
| P02457 | 1013 | PGAEGA  | P | G | R | D | G | A | A |
| P14618 | 403  | ELRRLA  | P | I | T | S | D | P | T |
| Q02388 | 2664 | KGEMGE  | P | G | V | P | G | Q | S |
| P86289 | 30   | QGPSGA  | P | G | P | K | G | V | Q |
| D2Y171 | 50   | DAADVK  | P | V | A | R | T | N | E |
| Q7M1I4 | 18   | PVVSSP  | P | P | P | Y | Y | Y | Y |
| Q9M0S4 | 36   | RSPLPS  | P | A | Q | P | P | R | T |
| P85154 | 176  | IGSAGP  | P | G | F | P | G | A | P |
| P30754 | 123  | QGPDGG  | P | G | P | A | G | P | S |
| A1X158 | 73   | TAWKAP  | P | P | A | W | T | A | W |
| P02457 | 992  | PGPMGP  | P | G | L | A | G | P | P |
| P30754 | 54   | IGKRGP  | P | G | P | A | G | I | A |
| P02457 | 776  | KGEAGP  | P | G | P | A | G | P | T |
| P02821 | 9    | APGLGA  | P | A | P | Y | P | D | P |
| Q05707 | 1470 | AGPPGG  | P | G | L | R | G | P | K |
| P0C8V5 | 57   | RDECFS  | P | G | T | F | C | G | I |
| Q9SJY7 | 35   | TTVTTP  | P | T | A | L | P | P | V |
| P30754 | 645  | QGIQGG  | P | G | P | P | G | D | A |
| P30754 | 243  | PGPSGF  | P | G | P | R | G | M | P |
| P02467 | 439  | NGDAGR  | P | G | E | P | G | L | M |
| Q05707 | 1659 | QGPPGE  | P | G | R | P | G | S | P |
| P02457 | 323  | PGAAGP  | P | G | P | T | G | P | A |
| P08427 | 30   | DVCAGS  | P | G | I | P | G | A | P |
| Q9LJD9 | 36   | EAPAPS  | P | T | S | D | A | A | M |
| P01042 | 383  | SLMKRP  | P | G | F | S | P | F | R |
| P85886 | 55   | RTCCSR  | P | T | C | R | M | E | Y |
| Q05707 | 1532 | KGDTGL  | P | G | P | Q | G | I | P |
| P30754 | 714  | PGSPGQ  | P | G | L | P | G | P | S |
| P85154 | 497  | PGERGI  | P | G | E | F | G | L | P |
| Q05707 | 1665 | PGRPGS  | P | G | A | P | G | E | Q |
| P02457 | 737  | KGDRGD  | P | G | P | K | G | A | D |
| Q05707 | 1726 | PSGESR  | P | G | S | P | G | P | P |
| Q7M1I4 | 12   | SSPPPP  | P | V | V | S | S | P | P |
| Q9ZT16 | 38   | PPPATP  | P | P | V | A | T | P | P |
| P84900 | 54   | ESPD RP | P | G | F | S | P | F | R |
| P30754 | 417  | QGRAGP  | P | G | A | R | G | E | P |
| P23805 | 195  | SGARGP  | P | G | L | K | G | D | R |
| Q05707 | 1574 | PGPIGI  | P | G | T | P | G | V | P |
| Q7Z096 | 38   | RVKNRG  | P | S | F | C | K | A | D |
| P30754 | 888  | MGQRGL  | P | G | A | A | G | P | P |
| P02457 | 335  | AGPPGF  | P | G | A | A | G | A | K |
| P12111 | 2239 | AGPAGP  | P | G | L | I | G | E | Q |
| Q9C5S0 | 33   | PTATPA  | P | P | T | P | T | T | P |
| P58923 | 11   | RDSRCP  | P | V | C | C | M | G | L |

---

---

|        |      |                                  |
|--------|------|----------------------------------|
| Q05707 | 1643 | AILNQI <b>P</b> SHSSSI           |
| Q941C7 | 63   | KHDPGV <b>P</b> PSATGQ           |
| Q9BPB2 | 49   | QQKRLC <b>P</b> DYTDPC           |
| P0C1X1 | 55   | NCCGYN <b>P</b> MTICPP           |
| Q9C5S0 | 27   | QAPTSP <b>P</b> TATPAP           |
| P85020 | 15   | IQLRAC <b>P</b> CCPN@@           |
| P05482 | 17   | KDRRCK <b>P</b> LKCCA@           |
| Q05707 | 1689 | AGVPGT <b>P</b> GERGLT           |
| O82337 | 33   | QSLAPA <b>P</b> APTS DG          |
| P0C2W8 | 292  | AKGEPG <b>P</b> IGIQGP           |
| P85153 | 648  | TGLQGL <b>P</b> GPPGTS           |
| Q8LG54 | 26   | LAQAPA <b>P</b> SPTTTV           |
| Q05707 | 1747 | PGHLGV <b>P</b> GPGGPS           |
| P02745 | 85   | PGKVG <b>P</b> YGP SGPL          |
| Q9ZT16 | 37   | TPPPAT <b>P</b> PPVATP           |
| P30754 | 237  | SGESGL <b>P</b> GPSGFP           |
| P15502 | 286  | AGVPGV <b>P</b> GAIPGI           |
| P69746 | 5    | @@CCGV <b>P</b> NAACHP           |
| Q9UKV8 | 700  | LEKDYQ <b>P</b> GITFIV           |
| P30754 | 276  | QGRPGA <b>P</b> GVKGSS           |
| P80762 | 10   | LPPVPP <b>P</b> PVPTF            |
| P02457 | 536  | TGSPGS <b>P</b> GPDGKT           |
| P69765 | 49   | RCCPGK <b>P</b> CCRIG@           |
| P85154 | 479  | PGFQGL <b>P</b> GPSGTA           |
| P0C2W8 | 764  | PGEVGP <b>P</b> GPPGPA           |
| A1X158 | 72   | WTAWKA <b>P</b> PPAWTA           |
| P14618 | 408  | APITSD <b>P</b> TEATAV           |
| D2Y168 | 57   | SSNKCS <b>P</b> GFPG@@           |
| Q7XAD0 | 120  | DYVAS <b>P</b> PPPKPD            |
| P30754 | 723  | PGPSGQ <b>P</b> GPSGPA           |
| P58922 | 61   | LTTCL <b>P</b> A <b>P</b> SECCSE |
| P15502 | 415  | VGVGGI <b>P</b> GVAGVP           |
| P30754 | 915  | QGPVGA <b>P</b> GSQGPA           |
| P01522 | 49   | STRCKS <b>P</b> GSSCSP           |
| P52285 | 143  | IKNDFT <b>P</b> EEEEQI           |
| P85154 | 410  | AGARGE <b>P</b> GNIGFP           |
| Q7Z094 | 29   | LSGICA <b>P</b> STNWIL           |
| P02457 | 788  | TGARGA <b>P</b> GDRGEP           |
| Q15848 | 71   | KGEKGD <b>P</b> GLIGPK           |
| P15502 | 116  | AGLGGV <b>P</b> GVGGLG           |
| P0C1X1 | 74   | CPPKRK <b>P</b> GRRND@           |
| Q05707 | 1544 | PGGVGS <b>P</b> GRDGSP           |
| P02457 | 296  | MGPRGL <b>P</b> GERGRP           |
| P02457 | 911  | AGRPGE <b>P</b> GPA GPP          |
| P19999 | 73   | PGSVGA <b>P</b> GSQGPK           |
| P85153 | 12   | VGPIGP <b>P</b> GERGAP           |
| P29602 | 121  | PPSSSS <b>P</b> PSSVMP           |
| P0CH16 | 18   | KSRACK <b>P</b> SYCC@@           |
| Q9LJD9 | 34   | QTEAPA <b>P</b> SPTSDA           |
| P85012 | 8    | YCCRR <b>P</b> PCTLIC@           |
| P05539 | 839  | AAGRVG <b>P</b> PGSNGN           |
| P15502 | 342  | VPAGV <b>P</b> GVGVPG            |
| P02457 | 635  | PGFQGL <b>P</b> GPA GPP          |
| P02457 | 545  | DGKTGP <b>P</b> GPA GQD          |
| Q25460 | 649  | AKPSYP <b>P</b> TYKPKI           |
| P30754 | 774  | RGEDGP <b>P</b> GVSGPT           |
| P82439 | 9    | QYSPPP <b>P</b> PKKKYY           |
| P30754 | 855  | PGKDGL <b>P</b> GLAGRP           |
| Q7Z094 | 11   | CKADEK <b>P</b> CEYHAD           |

---

---

|        |      |        |          |
|--------|------|--------|----------|
| Q05707 | 1503 | PGPQGP | PGPQGPS  |
| P02747 | 63   | KGEPGI | PAIPGIR  |
| P02457 | 560  | PGPAGP | PGARGQA  |
| Q05707 | 1517 | LSIQGM | PGMPGEK  |
| Q16665 | 402  | ALTLLA | PAAGDTI  |
| P58928 | 22   | NPGTMC | PSCMCTN  |
| P02457 | 383  | PGADGQ | PGAKGAT  |
| P02457 | 671  | RGERGF | PGERGVQ  |
| P02457 | 926  | PGEKGS | PGADGPI  |
| P30754 | 621  | RGDMGS | PGERGSP  |
| P30754 | 647  | IQQQPG | PGDAGP   |
| P30754 | 174  | IGSTGS | PGFPGTP  |
| Q7Z091 | 8    | CKKDRK | PCTSYHAD |
| P0C8V9 | 55   | AGNYCG | PTVMKIC  |
| P00057 | 79   | YDYLLN | PKKYIPG  |
| P55963 | 20   | CCKDR  | PSYCGQ@  |
| Q9LVC0 | 34   | AVDAPA | PSPTSDA  |
| P82439 | 10   | YSPPPP | PKKKY@   |
| P58804 | 21   | FKTCCG | PGDWQC   |
| P15502 | 580  | GLGAGI | PGLGVGV  |
| P08427 | 36   | PGIPGA | PGNHGLP  |
| Q7XAD0 | 58   | YKTPPP | PTSSSPT  |
| Q9BPB1 | 58   | WQYCES | PTDCCSW  |
| P58782 | 21   | GCKVGR | PPYCDRP  |
| Q7XAD0 | 119  | HDYVAS | PPPPKPQ  |
| Q9SJY7 | 28   | QAPAPA | PTTVTPP  |
| P30754 | 72   | DGRDGE | PGPRGGI  |
| P02457 | 1112 | QGPPGP | PGAPGEQ  |
| P02457 | 518  | PGEAGR | PGEAGLP  |
| P58928 | 17   | TCCGYN | PGTMCPS  |
| P86289 | 12   | PGIAGA | PGFPGAR  |
| P02457 | 653  | PGEQGV | PGNAGAP  |
| P80762 | 6    | @NMYLP | PVPPPPV  |
| P30754 | 525  | VGPRGM | PGERGAT  |
| P30754 | 161  | VDGLAG | PPGPPGP  |
| Q05707 | 1577 | IGIPGT | PGVPGIT  |
| Q7XAD0 | 80   | DSVLPP | PSPKTD   |
| P02457 | 887  | IGLPGP | PGPAGKZ  |
| Q9SJY7 | 34   | PTTVTP | PPTALPP  |
| P23805 | 153  | PGIQGF | PGPSGLK  |
| Q25460 | 92   | KPKPSY | PPTYKSK  |
| P30754 | 1014 | SGPPGP | PGPPGPP  |
| Q02388 | 2185 | VGGHGD | PGPPGAP  |
| P58841 | 11   | DCLVCI | PCCPN@@  |
| Q7M1I4 | 10   | SYSSPP | PPPVVSS  |
| P84349 | 60   | YQWLGA | PVPYPDP  |
| P60513 | 6    | @DDCIK | PYGFCSL  |
| P30754 | 24   | RGPPGP | PGSPGQQ  |
| P30754 | 273  | TGEQGR | PGAPGVK  |
| P30754 | 513  | GGERGA | PGDRGNV  |
| Q25460 | 175  | SSYKAK | PSYPPTY  |
| P02457 | 728  | RGAAGL | PGAKGDR  |
| P0C2W8 | 767  | VGPPGP | PGPAGEK  |
| P86289 | 54   | TGPIGP | PGPAGAP  |
| Q25460 | 595  | PSYKAK | PTYPSTY  |
| P05539 | 1076 | LQGLPG | PPGPSGD  |
| P0C7W7 | 6    | @@IIGA | PCRRCYH  |
| P0C8W0 | 68   | CETDTG | PCCCKPN  |
| Q4ZJN1 | 151  | LGPKGL | PGPMGPI  |

---

---

|        |      |                         |
|--------|------|-------------------------|
| P39056 | 9    | INGQGA <b>P</b> APYPDP  |
| P19999 | 61   | RGLQGP <b>P</b> GKLGPP  |
| Q05707 | 1674 | PGEQGP <b>P</b> GTPGFP  |
| P83184 | 5    | @@YAEV <b>P</b> SPAAQA  |
| P0C8W0 | 53   | EKRGC <b>D</b> PTDGCQT  |
| P84698 | 7    | DCPTRC <b>P</b> TTCANG  |
| Q05707 | 1680 | PGTPGF <b>P</b> GNAGVP  |
| P02457 | 278  | AGPKGE <b>P</b> GSPGEN  |
| P0C2W8 | 290  | AGAKGE <b>P</b> GPIGIQ  |
| P85011 | 6    | @GCCSD <b>P</b> RCRYRC  |
| P02457 | 362  | QGSERGE <b>P</b> GPPGPA |
| P85154 | 284  | SGSKGE <b>P</b> GSAGPQ  |
| P12111 | 2316 | KGERGF <b>P</b> GYPGPK  |
| P30754 | 849  | PGQEGA <b>P</b> GKDGLP  |
| P02457 | 935  | DGPIGA <b>P</b> GTPGPQ  |
| P56529 | 52   | LLERRH <b>P</b> PCCMYG  |
| P02457 | 377  | AGPAGN <b>P</b> GADGQP  |
| P30754 | 249  | PGPRGM <b>P</b> GTAGSP  |
| Q25460 | 159  | PKPSYP <b>P</b> SYKTKK  |
| P02745 | 45   | PGRRGR <b>P</b> GKGEQ   |
| P02457 | 584  | AGEPGK <b>P</b> GERGAP  |
| P30754 | 792  | QGERGM <b>P</b> GMVGLR  |
| Q3Y5Z3 | 48   | PGHNGT <b>P</b> GRDGRD  |
| Q93WP8 | 45   | NLPPPS <b>P</b> ASSPPS  |
| Q4ZJN1 | 34   | SGIPGN <b>P</b> GHNGLP  |
| P56529 | 53   | LERRHP <b>P</b> CCTMYGR |
| P85020 | 5    | @@GCCS <b>P</b> WNCIQL  |
| P30754 | 990  | PGKDGQ <b>P</b> GPSGRV  |
| P05539 | 1133 | ETGPAG <b>P</b> PGNPGP  |
| P85016 | 10   | PPQWCG <b>P</b> DCTSPC  |
| P30754 | 540  | AGPTGS <b>P</b> GVAGAK  |
| P02457 | 1007 | AGREGA <b>P</b> GAEGAP  |
| Q9LYF6 | 31   | EAPAPS <b>P</b> TSGSSA  |
| Q941C7 | 64   | HDPGVP <b>P</b> SATGQR  |
| P23805 | 111  | RGPPGM <b>P</b> GPGAGRE |
| P30754 | 503  | ATGPSG <b>P</b> AGPGGE  |
| P02457 | 1037 | AGPPGA <b>P</b> GAPGAP  |
| P30754 | 1017 | PGPPGP <b>P</b> GPPGNS  |
| P30754 | 180  | PGFPGT <b>P</b> GSKGDR  |
| P69747 | 55   | RGCCSD <b>P</b> RCNYDH  |
| P86289 | 90   | PGATGF <b>P</b> GAAARG  |
| P23805 | 147  | KGGVGA <b>P</b> GIQGF   |
| P23805 | 108  | TGPRGP <b>P</b> GMMPGA  |
| P08252 | 67   | SQCPGG <b>P</b> TPTPPT  |
| P12111 | 2100 | KGSRGF <b>P</b> GEEKGEV |
| P02457 | 215  | RGPAGP <b>P</b> GKNGDD  |
| P86290 | 12   | PGSAGP <b>P</b> GPAGLR  |
| P58782 | 22   | CKVGRP <b>P</b> YCDRPS  |
| P30754 | 717  | PGQPGL <b>P</b> GPSGQP  |
| P30754 | 207  | VGLSGQ <b>P</b> GVAGEN  |
| P30754 | 815  | MKGDGG <b>P</b> PGPSGD  |
| P02457 | 503  | PGERGS <b>P</b> GAVGPK  |
| P08427 | 67   | GPPGGM <b>P</b> GLPGRD  |
| P30754 | 551  | AKGQGG <b>P</b> PGPAGL  |
| P30754 | 150  | DGKSGL <b>P</b> GLRGVD  |
| P58843 | 5    | @@DQSC <b>P</b> WCGFTC  |
| P58914 | 7    | CKPPGS <b>P</b> CRVSSY  |
| Q05707 | 1741 | PGPRGP <b>P</b> GHLGVP  |
| P56710 | 6    | @SKCFS <b>P</b> GTFCGI  |

---



---

|        |      |                                 |
|--------|------|---------------------------------|
| Q6PSU2 | 74   | SQDPYS <b>P</b> SQDPDR          |
| P30754 | 53   | PIGKRG <b>P</b> PGPAGI          |
| P01523 | 56   | RRDCCT <b>P</b> PKKCKD          |
| P30754 | 861  | PGLAGR <b>P</b> GERGEP          |
| O82337 | 35   | LAPAPA <b>P</b> TSDGTS          |
| Q7M1I4 | 11   | YSSPPP <b>P</b> PVVSSP          |
| P85154 | 599  | DGARGA <b>P</b> GAVGAP          |
| P08427 | 42   | PGNHGL <b>P</b> GRDGRD          |
| Q25460 | 115  | PTYKAK <b>P</b> SYPSSY          |
| P0C2W8 | 1001 | NGLPGP <b>P</b> GPPGPR          |
| Q4ZJN1 | 76   | RGEKGE <b>P</b> GADGRV          |
| P85154 | 731  | TGPPGP <b>P</b> GAAAGKE         |
| P30754 | 177  | TGSPGF <b>P</b> GTPGSK          |
| P02457 | 182  | RGLPGP <b>P</b> GAPGPQ          |
| Q25460 | 866  | KAKTSY <b>P</b> PAYKPT          |
| P30754 | 228  | DGANGE <b>P</b> GASGES          |
| P85016 | 5    | @GCCP <b>P</b> QWCGPD           |
| P02747 | 54   | DGYDGL <b>P</b> GPKGEP          |
| Q8LG54 | 28   | QAPAPS <b>P</b> TTTVTP          |
| P30754 | 327  | PGSRGL <b>P</b> GMTGAS          |
| Q2I2Q5 | 58   | RDECCE <b>P</b> QWCDGA          |
| P28880 | 55   | CRSSGS <b>P</b> CGVTSI          |
| Q9U3Z3 | 53   | WGGCGH <b>P</b> CRHPGK          |
| P02457 | 185  | PGPPGA <b>P</b> GPGGFQ          |
| Q0VTT8 | 52   | KRFEPV <b>P</b> PGFTPF          |
| P85154 | 824  | LGIAGP <b>P</b> GARGPP          |
| P08427 | 33   | AGSPGI <b>P</b> GAPGNH          |
| P02747 | 81   | KGEPGL <b>P</b> GHPGKN          |
| P02457 | 719  | PGLEGM <b>P</b> GERGAA          |
| Q93WP8 | 43   | GANLPP <b>P</b> SPASSP          |
| P0C8W0 | 93   | CSCSGQ <b>P</b> SDCPV@          |
| P30754 | 1019 | PPGPPG <b>P</b> PGNSDY          |
| P02457 | 269  | DGAKGQ <b>P</b> GPAQPK          |
| P85017 | 11   | RPICTC <b>P</b> CCIGP@          |
| P02457 | 236  | PGQRGP <b>P</b> GPGGAR          |
| P85154 | 605  | PGAVGA <b>P</b> GPAAT           |
| Q8LG54 | 36   | TTVT <b>P</b> PPVATPPP          |
| P56529 | 64   | GRCRRY <b>P</b> GCSSAS          |
| P0C1X1 | 61   | PMTICP <b>P</b> CMCTYS          |
| P02457 | 287  | PGENG <b>P</b> QMGPR            |
| P80762 | 9    | YLPPVP <b>P</b> PPVVPT          |
| A6YR20 | 82   | TAAW <b>W</b> CPG <b>T</b> KWD@ |
| P02457 | 707  | AGAPGA <b>P</b> GN <b>E</b> GPP |
| P05483 | 7    | CKSPGT <b>P</b> CSRGMR          |
| P0C8S5 | 10   | IYDAKP <b>P</b> FSCAGL          |
| P80760 | 11   | PPVEKP <b>P</b> VYKPPV          |
| P02457 | 533  | KGLTGS <b>P</b> GSPGPD          |
| Q15848 | 95   | EGPRGF <b>P</b> GIQGRK          |
| Q05707 | 1550 | PGRDGS <b>P</b> GQGLP           |
| P02457 | 875  | AGRVGP <b>P</b> GPSGNI          |
| P0CG45 | 8    | PPCCTP <b>P</b> KKHCPA          |
| P30754 | 1020 | PGPPGP <b>P</b> GN <b>S</b> DYG |
| P30754 | 773  | ERGEDG <b>P</b> PGVSGP          |
| P0C8V9 | 67   | CCGFCS <b>P</b> FSKICM          |
| P30754 | 303  | AGKRGS <b>P</b> GSPGPA          |
| P30754 | 663  | KGDIGF <b>P</b> GERGTR          |
| Q3Y5Z3 | 86   | ITGIEG <b>P</b> RGFPGT          |
| P02457 | 317  | RGNDGA <b>P</b> GAA <b>G</b> PP |
| Q7Z092 | 11   | CKANGK <b>P</b> CSYHAD          |

---



---

|        |      |                |
|--------|------|----------------|
| P15502 | 283  | VGGAGVPGVPGAI  |
| Q4ZJN1 | 160  | MGPIGKPGPRGEA  |
| P30754 | 165  | AGPPGPPIGST    |
| Q05707 | 1686 | PGNAGVPGTPGER  |
| P30754 | 27   | PGPPGSPGQQGYQ  |
| P08252 | 72   | GPTPTPTTPPGGG  |
| P02457 | 1148 | DGLNGLPGPIGPP  |
| Q05707 | 1467 | LGPAGPPGGPGLR  |
| P80760 | 6    | @NYDKPPVEKPPV  |
| P00877 | 151  | VKTFFVGPHGIQV  |
| P02745 | 97   | LGARGIPGIKGTK  |
| P30754 | 21   | IGPRGPPGPPGSP  |
| P02457 | 230  | AGKPGRPGQRGPP  |
| Q3Y5Z3 | 42   | AGIPGHPGHNGTP  |
| Q7XAD0 | 79   | HDSVLPSPSKTD   |
| P0C8S5 | 24   | GGCVLPNLRPKF   |
| Q05707 | 1482 | KGQQGEPGPKGPD  |
| P0CH18 | 13   | CAHKGEPTICCR   |
| Q93WP8 | 42   | RGANLPPSPASS   |
| P02747 | 39   | YGIPGMGLPGAP   |
| P30754 | 312  | PGPAGSPGPQGDR  |
| P24091 | 69   | CPGGPTPGGGDL   |
| P80774 | 10   | PPDFANFFIIPQN  |
| P30754 | 759  | RGSDGEPGRDGTK  |
| Q7XAD0 | 122  | VASPPPPKPKQDEQ |
| Q9ZT16 | 33   | TPTATPPPATPPP  |
| Q9LVC0 | 32   | VAAVDAAPSPTS   |
| Q800F1 | 54   | EAPERPPGFTPFR  |
| P02457 | 953  | RGVVGLPGQRGER  |
| P0CH18 | 6    | @FGSFI PCAHKGE |
| Q02388 | 2667 | MGEPGVPGQSGAP  |
| P02457 | 302  | PGERGRPGPSGPA  |
| Q25460 | 118  | KAKPSYPSSYKPK  |
| P02457 | 713  | PGNEGPPGLEGMP  |
| P30754 | 164  | LAGPPGPPGPIGS  |
| P85154 | 728  | AGITGPPGPPGAA  |
| P30754 | 561  | AGLVGLPGERGPK  |
| P02457 | 647  | PGEAGKPGEQGVV  |
| P30754 | 783  | SGPTGAPGQQGER  |
| P29602 | 132  | MPPPVMPPPSPS@  |
| P24091 | 67   | SQCPGGPTPPGGG  |
| Q7M1I4 | 9    | YSYSSPPPPPVVS  |
| P30754 | 533  | ERGATGPAGPTGS  |
| Q9M0S4 | 28   | QAPGPAPTRSPLP  |
| P30754 | 500  | AVGATGPSGPAGP  |
| Q4ZJN1 | 175  | MGPQGEPGVRGMR  |
| P02457 | 251  | PGTAGLPGMKGHR  |
| Q7XAD0 | 51   | GNYGRTPYKTPPP  |
| P0CH16 | 8    | RVCCGYPMCKSR   |
| P02457 | 200  | PGEPPGPGASGPM  |
| P02457 | 281  | KGEPPGPGENGAP  |
| P85022 | 11   | RPICMCPCCIGAG  |
| P02457 | 365  | RGEPPGPGPAGAA  |
| P29602 | 129  | SSVMPPVMPPPPS  |
| Q9ZT16 | 26   | LAQAPAPTPTATP  |
| Q9C5S0 | 31   | SPPTATPAPTPT   |
| P30754 | 1010 | DDGRSGPPGPPGP  |
| P30754 | 903  | RGERGEPGGQGVQ  |
| Q7XAD0 | 121  | YVASPPPKPKQDE  |

---

---

|        |      |                |
|--------|------|----------------|
| Q4ZJN1 | 115  | TGEQGLPGETGPQ  |
| P08427 | 54   | DGVKGDPGPPGPM  |
| Q7M1I4 | 26   | PYYYYSPPPV@@   |
| Q02388 | 2673 | PGQSGAPGKEGLI  |
| Q02388 | 2188 | HGDPGP PGAPGLA |
| P85154 | 182  | PGFPGA PGPKGEI |
| P15502 | 481  | PGTGGV PGVGTPA |
| P02747 | 96   | MGPPGM PGVPGPM |
| P02457 | 965  | RGFPGL PGPSGEP |
| D5KR58 | 49   | CWLCLGPNACCRG  |
| P02467 | 442  | AGRPGE PGLMGPR |
| P30754 | 219  | NGHPGM PGMDGAN |
| P23805 | 78   | AGRAGR PGWVGPI |
| P30754 | 506  | PSGPAG PGGERGA |
| P02457 | 485  | PGSRGF PGADGIA |
| P08252 | 75   | PTPPTP PGGGDLG |
| P02457 | 512  | VGPKGS PGEAGRP |
| P02457 | 917  | PGPAGP GPPGGEK |
| Q02388 | 2176 | QGPRGP GPPVGGH |
| P05539 | 1145 | PPGPPG PPGPGID |
| P29602 | 128  | PSSVMP PPMPPPP |
| P15502 | 327  | GLVPGG PGFGPGV |
| D2Y171 | 58   | ARTNEG PGRDPAP |
| P30754 | 627  | PGERGS PGPAGER |
| P02747 | 45   | PGLPGA PGKDGYD |
| Q05707 | 1598 | LGPPGV PGAKGER |
| P30754 | 90   | RGAGGM PGMPGPK |
| P02457 | 449  | AGVQGP PGPAGEE |
| P0C1W5 | 74   | CGPMCC PASHCYC |
| Q9ZT16 | 39   | PPATPP PVATPPP |
| P30754 | 1016 | PPGPPG PPGPPGN |
| P02747 | 105  | PGPMGI PGEPGEE |
| P02747 | 36   | TGCYGI PGMPGLP |
| P30754 | 744  | KGARGS PGLVGKQ |
| P86500 | 43   | DATTNC PDTYYFG |
| P02745 | 57   | QGEPGA PGIRTGI |
| P86289 | 15   | AGAPGF PGARGPS |
| P30754 | 465  | TGARGP PGPRGQQ |
| Q4ZJN1 | 61   | AGEPGH PGGPGKD |
| P85012 | 7    | DYCCRR PPCTLIC |
| P02457 | 884  | SGNIGL PGPPGPA |
| P56711 | 76   | CELYAF PSFGA@@ |
| P81727 | 13   | AYGESCPSSCNTC  |
| Q8LG54 | 35   | TTTVTP PPVATPP |
| P23805 | 129  | QGSMGP PGTPGPK |
| P02457 | 425  | KGNSGE PGAPGNK |
| P23805 | 132  | MGPPGT PGPKGET |
| P85154 | 815  | AGAVGE PGPLGIA |
| Q25460 | 214  | KAKPTY PSTYKAK |
| P30754 | 348  | KGPSGE PGAKGPT |
| P02457 | 479  | AGERGA PGSRGFP |
| P0C1W8 | 11   | PNAACP PCVCNKT |
| P83184 | 7    | YAEVPS PAAQAPT |
| P08427 | 70   | GGMPGL PGRDGLP |
| P80762 | 11   | PPVPPP PVVPTF@ |
| P02457 | 908  | TGPAGR PGEPGPA |
| A1X158 | 65   | WKATPK PWTAWKA |
| Q7XAD0 | 57   | PYKTPP PPTSSSP |
| Q25460 | 93   | PKPSYP PTYKSKP |

---

---

|        |      |        |         |
|--------|------|--------|---------|
| Q6PSU2 | 86   | RRDPYS | PSPYDRR |
| D2Y171 | 64   | PGRDPA | PCCQHPI |
| P30754 | 453  | TGAAGP | PGAAGPT |
| P30754 | 552  | KGQGGP | PGPAGLV |
| Q7XAD0 | 56   | TPYKTP | PPPTSSS |
| P30754 | 867  | PGERGE | PGVAGRA |
| P02457 | 1115 | PGPPGA | PGEQGPS |
| P0CG45 | 7    | LPPCCT | PPKKHCP |
| P08427 | 76   | PGRDGL | PGAPGAP |
| P02457 | 629  | QGPAGA | PGFQGLP |
| P58786 | 57   | LRRSGC | PWEPWCG |
| P0C1X1 | 60   | NPMTIC | PPCMCTY |
| P0C1W6 | 59   | INTRDS | PWGRCCR |
| P30754 | 255  | PGTAGS | PGQAGAK |
| P29602 | 122  | PPSSSP | PSSVMPP |
| P02457 | 1133 | AGPRGP | PGSAGAA |
| P02457 | 1154 | PGPIGP | PGPRGRT |
| Q05707 | 1595 | QGALGP | PGVPGAK |
| P02457 | 1153 | LPGPIG | PPGPRGR |
| Q9M0S4 | 26   | IAQAPG | PAPTRSP |
| P58804 | 22   | KTCCGP | PGDWQCV |
| P12108 | 178  | CPTNCP | PGPKGPQ |
| P02457 | 839  | AGPTGA | PGPAGZV |
| P15502 | 677  | LGGVGI | PGGVVGA |
| P02747 | 42   | PGMPGL | PGAPGKD |
| P0C1X1 | 40   | VVHERA | PELVVTA |
| P02457 | 554  | AGQDGR | PGPAGPP |
| Q05707 | 1556 | PGQRGL | PGKDGSS |
| P30754 | 954  | QGLQGT | PGHSGES |
| P58915 | 21   | CCRSCN | PYSRKC@ |
| Q05707 | 1732 | PGSPGP | PGSPGPR |
| P30754 | 1011 | DGRSGP | PGPPGPP |
| P07550 | 382  | LLCEDL | PGTEDFV |
| P08252 | 71   | GGPTPT | PPTPPGG |
| P02745 | 54   | KGEQGE | PGAPGIR |
| P02457 | 470  | PGPAGL | PGPAGER |
| P15502 | 607  | GVGAGV | PGFGAGA |
| A6YR20 | 65   | WCDQEA | PHGNCCD |
| P69746 | 11   | PNAACH | PCVCKNT |
| P0CH18 | 20   | CTICCR | PLRCHEE |
| P30754 | 843  | SGQAGA | PGQEGAP |
| Q05707 | 1729 | ESRPGS | PGPPGSP |
| P86500 | 24   | ECLENY | PGQASQR |
| P30754 | 372  | PGIAGL | PGNPGSD |
| P05539 | 602  | FQGLPG | PPGPPGE |
| P30754 | 387  | PGKDGR | PGIRGKD |
| P02457 | 590  | PGERGA | PGPPGAV |
| P30754 | 963  | SGESGP | PGAPGPR |
| P30754 | 483  | AGAQGT | PGEAGKT |
| P02457 | 641  | PGPAGP | PGEAGKP |
| P55963 | 13   | PNAACH | PCSCKDR |
| P58925 | 57   | RLCCGF | PKSCRSR |
| P30754 | 321  | QGDRGL | PGSRGLP |
| Q9LJD9 | 32   | AAQTEA | PAPSPTS |
| P85154 | 761  | TGASGP | PGFAGEK |
| P0C349 | 8    | HGCCKG | PKGCSSR |

---

## Negative dataset

| Uniprot ID | Site | Sequence       |
|------------|------|----------------|
| Q3Y5Z3     | 14   | LLLLLALPSHGEDN |
| Q3Y5Z3     | 24   | EDNMEDPLPKGA   |
| Q3Y5Z3     | 25   | DNMEDPLPKGAC   |
| Q3Y5Z3     | 27   | MEDPPLPKGACAG  |
| Q3Y5Z3     | 57   | DGRDGTGGEKGEK  |
| Q3Y5Z3     | 66   | KGEKGDPLVGPK   |
| Q3Y5Z3     | 71   | DPGLVGPKGDTGE  |
| Q3Y5Z3     | 90   | EGPRGFPGTPGRK  |
| Q3Y5Z3     | 93   | RGFPGTGRKGEP   |
| Q3Y5Z3     | 99   | PGRKGEGESAYV   |
| Q3Y5Z3     | 121  | ERQVTVPNVPIRF  |
| Q3Y5Z3     | 124  | VTVPNVPIRFTKI  |
| Q3Y5Z3     | 150  | KFLCNIPLYYFS   |
| Q15848     | 14   | LLLLLALPGHDQET |
| Q15848     | 25   | ETTTQGGVLLPL   |
| Q15848     | 30   | GPGVLLPLPKGAC  |
| Q15848     | 32   | GVLLPLPKGACTG  |
| Q15848     | 86   | IGETGVGAEGPR   |
| Q15848     | 126  | ETYVTIPINMPIRF |
| Q60994     | 14   | LFLLLILPSHAEDD |
| Q60994     | 29   | TTEELAPALVPPP  |
| Q60994     | 33   | LAPALVPPPKGTC  |
| Q60994     | 34   | APALVPPPKGTCA  |
| Q60994     | 35   | PALVPPPKGTCAG  |
| Q60994     | 47   | GWMAGIPGHPGHN  |
| Q60994     | 50   | AGIPGHPGHNGTP  |
| Q60994     | 56   | PGHNGTPGRDGRD  |
| Q60994     | 79   | DAGLLGPKGETGD  |
| P07550     | 4    | @@@MGQPGNGSAF  |
| P07550     | 14   | SAFLLAPNGSHAP  |
| P07550     | 20   | PNGSHAPDHDVTQ  |
| P07550     | 88   | MGLAVVPFGAAHI  |
| P07550     | 138  | YFAITSPFKYQSL  |
| P07550     | 168  | GLTSFLPIQMHWY  |
| P07550     | 211  | IVSFYVPLVIMVF  |
| P07550     | 288  | FTLCWLFFFIVNI  |
| P07550     | 323  | VNSGFNLIYCRS   |
| P07550     | 330  | LIYCRSPDFRIAF  |
| Q9UKV8     | 7    | MYSGAGPALAPPA  |
| Q9UKV8     | 11   | AGPALAPAPPPPP  |
| Q9UKV8     | 12   | GPALAPAPPPPI   |
| Q9UKV8     | 14   | ALAPPAPPPPIQG  |
| Q9UKV8     | 15   | LAPPAPPPPIQGY  |
| Q9UKV8     | 16   | APPAPPPIQGYA   |
| Q9UKV8     | 17   | PPAPPPIQGYAF   |
| Q9UKV8     | 25   | QGYAFKPPRPDF   |
| Q9UKV8     | 26   | GYAFKPPRPDFG   |
| Q9UKV8     | 27   | YAFKPPRPDFGT   |
| Q9UKV8     | 29   | FKPPRPDFGTSG   |
| Q9UKV8     | 50   | FFEMDIPIKIDIYH |
| Q9UKV8     | 63   | YELDIKPEKCPRR  |
| Q9UKV8     | 67   | IKPEKCPRRVNRE  |
| Q9UKV8     | 92   | IFGDRKPVFDGRK  |
| Q9UKV8     | 105  | NLYTAMPLPIGRD  |
| Q9UKV8     | 107  | YTAMPLPIGRDKV  |
| Q9UKV8     | 120  | ELEVTLPGEGKDR  |

---

|        |     |               |
|--------|-----|---------------|
| Q9UKV8 | 152 | ALSGRLPSVPFET |
| Q9UKV8 | 155 | GRLPSVPFETIQ  |
| Q9UKV8 | 170 | VVMRHLPSMRYTP |
| Q9UKV8 | 176 | PSMRYTPVGRSFF |
| Q9UKV8 | 191 | SEGCSNPLGGGRE |
| Q9UKV8 | 208 | FHQSVRPSLWKMM |
| Q9UKV8 | 229 | AFYKAQPVIEFVC |
| Q9UKV8 | 249 | IEEQQKPLTDSQR |
| Q9UKV8 | 288 | CNVTRRPASHQTF |
| Q9UKV8 | 295 | ASHQTFPLQQESG |
| Q9UKV8 | 323 | KLVLRYPHLPCLQ |
| Q9UKV8 | 326 | LRYPHLPCLQVGQ |
| Q9UKV8 | 340 | QKHTYLPLEVCNI |
| Q9UKV8 | 373 | ATARSAPDRQEEI |
| Q9UKV8 | 392 | ASFNTDPYVREFG |
| Q9UKV8 | 415 | TGRVLQPPSILYG |
| Q9UKV8 | 416 | GRVLQPPSILYGG |
| Q9UKV8 | 430 | NKAIATPVQGVWD |
| Q9UKV8 | 458 | AIACFAPQRQCTE |
| Q9UKV8 | 484 | SRDAGMPIQGQPC |
| Q9UKV8 | 489 | MPIQGQPCFCKYA |
| Q9UKV8 | 503 | GADSVPMFRHLK  |
| Q9UKV8 | 523 | LVVVILPGKTPVY |
| Q9UKV8 | 527 | ILPGKTPVYAEVK |
| Q9UKV8 | 557 | NVQRTTQTLNL   |
| Q9UKV8 | 580 | VNNILLQGRPPV  |
| Q9UKV8 | 584 | LLPQGRPPVFQQP |
| Q9UKV8 | 585 | LPQGRPPVFQQPV |
| Q9UKV8 | 590 | PPVFQQPVIFLGA |
| Q9UKV8 | 601 | GADVTHPPAGDGK |
| Q9UKV8 | 602 | ADVTHPPAGDGKK |
| Q9UKV8 | 609 | AGDGKKPSIAAVV |
| Q9UKV8 | 622 | GSMDAHPNRYCAT |
| Q9UKV8 | 661 | KSTRFKPTRIIFY |
| Q9UKV8 | 731 | GKSGNIPAGTTVD |
| Q9UKV8 | 743 | DTKITHPTDFDY  |
| Q9UKV8 | 762 | IQGTSRPSHYHVL |
| Q9UKV8 | 800 | TRSVSIPAPAYYA |
| Q9UKV8 | 802 | SVSIPAPAYYHL  |
| P84895 | 2   | @@@@RPPGFSPF  |
| Q0VTT8 | 50  | EKKRFEVPPGFT  |
| Q0VTT8 | 53  | RFEPVPFGFTPFR |
| Q0VTT8 | 57  | VPPGFTPFRQT@@ |
| P84935 | 3   | @@@@VPFGFTPFR |
| P84900 | 50  | EKKRESPPRPPGF |
| P84900 | 53  | RESPDRPPGFSPF |
| P84900 | 58  | RPPGFSPFRIY@@ |
| Q4ZJN1 | 91  | KGIKGDPSRGSP  |
| Q4ZJN1 | 97  | PSRGSPGKHGPK  |
| Q4ZJN1 | 102 | SPGKHGPKSIGP  |
| Q4ZJN1 | 108 | PKSIGPTGEQGL  |
| Q4ZJN1 | 120 | LPGETGPQGQKGD |
| Q4ZJN1 | 132 | DKGEVGPTGPEGL |
| Q4ZJN1 | 135 | EVGPTGPEGLMGS |
| Q4ZJN1 | 144 | LMGSTGPLGPKGL |
| Q4ZJN1 | 147 | STGPLGPKGLPGP |
| Q4ZJN1 | 153 | PKGLPGPMGPICK |
| Q4ZJN1 | 156 | LPGPMGPICKPGP |
| Q4ZJN1 | 162 | PIGKPGPRGEAGP |

---

---

|        |     |                     |
|--------|-----|---------------------|
| Q4ZJN1 | 168 | PRGEAGPMGPQGE       |
| Q4ZJN1 | 171 | EAGPMGPQGE PGV      |
| Q4ZJN1 | 197 | GKVGGEAPLVPKSA      |
| Q4ZJN1 | 200 | GEAPLVPKSAFTV       |
| Q4ZJN1 | 215 | TVISKFPDAP I        |
| Q4ZJN1 | 216 | VISKFPDAP I K       |
| Q4ZJN1 | 217 | ISKFPDAP I K F      |
| Q4ZJN1 | 220 | FPPPDAP I K F D K I |
| P58843 | 14  | GFTCCLPNYCQGL       |
| P50982 | 51  | DPCCYHPTCNMSN       |
| P50982 | 58  | TCNMSN PQICG@@      |
| P69747 | 62  | RCNYDHPEICG@@       |
| P85886 | 62  | TCRMEYPELCGGR       |
| P0C351 | 9   | PGCCWN PACVKNR      |
| P60274 | 9   | DECCSN PACRVNN      |
| P0C1X1 | 23  | TTVVS I PSDRASD     |
| P0C1W8 | 10  | VPNAAC PCVCNK       |
| P30754 | 5   | @@YRAGPRYIQAQ       |
| P30754 | 14  | IQAQVGPIGPRGP       |
| P30754 | 17  | QVGPIGPRGP PG       |
| P30754 | 20  | PIGPRGP PGPPGS      |
| P30754 | 23  | PRGPPGP PGSPGQ      |
| P30754 | 44  | EPGDSGPMGPIGK       |
| P30754 | 47  | DSGPMGPIGKRGP       |
| P30754 | 56  | KRGPPGPAGIAGK       |
| P30754 | 74  | RDGEPGPRGGIGP       |
| P30754 | 80  | PRGGIGPMGPRGA       |
| P30754 | 83  | GIGPMGPRGAGGM       |
| P30754 | 95  | MPGMPGPKGHRGF       |
| P30754 | 119 | KSGNQGPDGGPGP       |
| P30754 | 125 | PDGGPGPAGPSGP       |
| P30754 | 131 | PAGPSGPIGPRGQ       |
| P30754 | 134 | PSGPIGPRGQTGE       |
| P30754 | 167 | PPGPPGPIGSTGS       |
| P30754 | 200 | AQGLQG PVGLSGQ      |
| P30754 | 239 | ESGLPGPSGFPGP       |
| P30754 | 245 | PSGFPGPRGMPGT       |
| P30754 | 266 | AKGDGGPTGEQGR       |
| P30754 | 284 | VKGSSGPPGDVGA       |
| P30754 | 308 | SPGSPGPAGSPGP       |
| P30754 | 314 | PAGSPGPQGDRGL       |
| P30754 | 344 | IPGEKGPSGEPGA       |
| P30754 | 353 | EPGAKGPTGDTGR       |
| P30754 | 401 | KQGEQG PQGPQGL      |
| P30754 | 404 | EQGPQG PQGLAGL      |
| P30754 | 452 | ETGAAGPPGAAGP       |
| P30754 | 458 | PPGAAGPTGARGP       |
| P30754 | 464 | PTGARGPPGPRGQ       |
| P30754 | 467 | ARGPPGPRGQQGF       |
| P30754 | 521 | DRGNVGPRGMPGE       |
| P30754 | 554 | QGGPPGPAGLVGL       |
| P30754 | 566 | LPGERGPKGVGGS       |
| P30754 | 581 | SRGDIGPRGKAGE       |
| P30754 | 605 | ENGLPGPSGLAAS       |
| P30754 | 629 | ERGSPGPAGERGP       |
| P30754 | 635 | PAGERGPAGSQGI       |
| P30754 | 653 | PPGDAGPAGTKGD       |
| P30754 | 680 | KQGARGPRGLAGK       |
| P30754 | 719 | QPGLPGPSGQPGP       |

---

---

|        |      |                |
|--------|------|----------------|
| P30754 | 725  | PSGQPGPSGPAGT  |
| P30754 | 728  | QPGPSGPAGTAGK  |
| P30754 | 779  | PPGVSGPTGAPGQ  |
| P30754 | 803  | LRGETGPMGGQGM  |
| P30754 | 818  | DGGPPGPSGDRGE  |
| P30754 | 830  | ERGNAGPQGPTGP  |
| P30754 | 833  | NAGPQGP TGPSGQ |
| P30754 | 836  | PQGPTGPSGQAGA  |
| P30754 | 893  | LPGAAGPPGDRGE  |
| P30754 | 911  | GQGVQGPVGAPGS  |
| P30754 | 920  | APGSQGPAGIMGM  |
| P30754 | 962  | HSGESGPPGAPGP  |
| P30754 | 968  | PPGAPGPRGARGE  |
| P30754 | 983  | GRGSQGP PGKDGQ |
| P30754 | 992  | KDGQPGPSGRVGP  |
| P30754 | 998  | PSGRVGPRGPSGD  |
| P30754 | 1001 | RVGPRGPSGDDGR  |
| Q24940 | 100  | ILSHGVPEANNR   |
| Q24940 | 166  | LVDCSGPWGNNGC  |
| Q24940 | 238  | LVGARRPAAVAVD  |
| Q24940 | 264  | QSQTCSPLRVNHA  |
| Q24940 | 320  | ASLASLPMVARFP  |
| P0C8S5 | 9    | GIYDAKPPFSCAG  |
| P0C8S5 | 23   | RGGCVLPPNLRPK  |
| C3VVN6 | 2    | @@@@@MPKLAVVL  |
| C3VVN6 | 15   | LVLLILPLSYFDA  |
| P0C1W5 | 2    | @@@@@MPKLEMMML |
| P0C1W6 | 75   | CGSMCCPRNGCTC  |
| P15472 | 24   | RCGRGNPQKCIGA  |
| P08252 | 36   | AGGARCP SGLCCS |
| P08252 | 56   | TNDYCGPGNCQSQ  |
| P08252 | 64   | NCQSQC PGGPTPT |
| P08252 | 120  | NAARSPGFGTSG   |
| P08252 | 154  | GGWATAPDGPYAW  |
| P08252 | 157  | ATAPDGPYAWGYC  |
| P08252 | 171  | LREQGSPGDYCTP  |
| P08252 | 177  | PGDYCTPSGQWPC  |
| P08252 | 182  | TPSGQWPCAPGRK  |
| P08252 | 185  | GQWPCAPGRKYFG  |
| P08252 | 194  | KYFGRGPIQISHN  |
| P08252 | 205  | HNYNYGPCGRAIG  |
| P08252 | 218  | VDLLNNPDLVATD  |
| P08252 | 225  | DLVATDPVISFKS  |
| P08252 | 239  | LWFWMT PQSPKPS |
| P08252 | 242  | WMTPQSPKPSCHD  |
| P08252 | 244  | TPQSPKPSCHDVI  |
| P08252 | 256  | IIGRWQPSAGDRA  |
| P08252 | 267  | RAANRLPGFGVIT  |
| P08252 | 308  | SILGVSPGDNLDC  |
| P24091 | 70   | PGGPTPPGGGDLG  |
| Q9BPJ7 | 16   | ICLLLFPLTAVPM  |
| Q9BPJ7 | 21   | FPLTAVPMDGDQP  |
| Q9BPJ7 | 27   | PMDGDQPADRP AE |
| Q9BPJ7 | 31   | DQPADRPAERMQD  |
| Q9BPJ7 | 45   | ISFEQH PMFDATR |
| Q2I2Q5 | 16   | TFLVLFP LTTLEL |
| Q2I2Q5 | 27   | ELDTDRPVERHAA  |
| Q2I2Q5 | 40   | IKQDLKPQERRGI  |
| Q2I2Q5 | 51   | GIRLHAPRDECCE  |

---



---

|        |     |                |
|--------|-----|----------------|
| P01523 | 27  | PMDGDEPANRPVE  |
| P01523 | 31  | DEPANRPVERMQD  |
| P01523 | 45  | ISSEQYPLFEKRR  |
| P58925 | 45  | ISSEEHPEFEKRQR |
| P0C424 | 4   | @@@CCAPSACRLG  |
| P58846 | 21  | FSLNAVPLDGDQP  |
| P58846 | 31  | DQPADQPAERLLD  |
| P58846 | 45  | ISFENNPFYDPAK  |
| P58846 | 49  | NNPFYDPAKRCCR  |
| P0C1N1 | 45  | ISSEHHPFYDPVK  |
| P0C1N1 | 49  | HHPPFDVVKRCCR  |
| P56529 | 16  | ICLLLFPIITALLM |
| P0C1N5 | 45  | ISSERHPMFDAVR  |
| P0C1N5 | 57  | RDCCPLPACPFGC  |
| P0C1N5 | 60  | CPLPACPFGCNPC  |
| P85017 | 6   | @KCCMRPICTCPC  |
| P0C8V5 | 34  | GLKDLFPKARHEM  |
| P0C8V5 | 43  | RHEMKNPEASKLN  |
| P0C8V6 | 56  | KRDECYPGTFCG   |
| P0C8V6 | 75  | CSERCFPFVCLSL  |
| D5KR58 | 28  | ADDMEYPKWLRGL  |
| P58913 | 75  | CSEFCLPGVCFGG  |
| P86289 | 20  | FPGARGPSGPQGP  |
| P86289 | 23  | ARGPSGPQGPPGA  |
| P86289 | 26  | PSGPQGPAGPAGP  |
| P86289 | 32  | PSGAPGPKGVPQGP |
| P86289 | 38  | PKGVPQGPQGPQGP |
| P86289 | 41  | VQGPQGPQGPQGP  |
| P86289 | 44  | PPGPQGPQGPQGP  |
| P86289 | 50  | PRGLTGPIGPQGP  |
| P86289 | 53  | LTGPPIGPQGPQGP |
| P86289 | 56  | PIGPQGPQGPQGP  |
| P86289 | 68  | DKGEAGPSGPQGP  |
| P86289 | 71  | EAGPSGPQGPQGP  |
| P86289 | 72  | AGPSGPQGPQGP   |
| P86289 | 74  | PSGPQGPQGPQGP  |
| P86289 | 83  | ARGSAGPPGATGF  |
| P86289 | 100 | GRGETGPAGPAGP  |
| P86289 | 103 | ETGPAGPAGPQGP  |
| P86289 | 106 | PAGPAGPPGPQGP  |
| P86289 | 109 | PAGPPGPAGAR@@  |
| P02457 | 48  | DKDVWKPEPCQIC  |
| P02457 | 50  | DVWKPEPCQICVC  |
| P02457 | 75  | EDTSDCPNAEIPF  |
| P02457 | 80  | CPNAEI PFGECCP |
| P02457 | 86  | PFGECCPICPDVD  |
| P02457 | 89  | ECCPICPDVDASP  |
| P02457 | 95  | PDVDASPVYPESA  |
| P02457 | 98  | DASPVYPESAGVE  |
| P02457 | 106 | SAGVEGPKGDTGP  |
| P02457 | 112 | PKGDTGPRGDRGL  |
| P02457 | 119 | RGDRGLPGPPGRD  |
| P02457 | 121 | DRGLPGPPGRDGI  |
| P02457 | 122 | RGLPGPPGRDGI   |
| P02457 | 128 | PGRDGI PGQPGLP |
| P02457 | 131 | DGIPGQPGLPGPP  |
| P02457 | 134 | PGQPGLPGPPGPP  |
| P02457 | 139 | LPGPPGPPGPPGL  |
| P02457 | 140 | PGPPGPPGPPGLG  |

---

---

|        |     |                 |
|--------|-----|-----------------|
| P02457 | 142 | PPGPPGPPGLGGN   |
| P02457 | 143 | PGPPGPGLGGNF    |
| P02457 | 151 | LGGNFAPQMSYGY   |
| P02457 | 167 | SAGVAVPGPMGPA   |
| P02457 | 169 | GVAVPGPMGPAGP   |
| P02457 | 172 | VPGPMGPAGPRGL   |
| P02457 | 175 | PMGPAGPRGLPGP   |
| P02457 | 181 | PRGLPGPPGAPGP   |
| P02457 | 187 | PPGAPGPQGFQGP   |
| P02457 | 193 | PQGFQGPGEPEG    |
| P02457 | 205 | EPGASGPMGPRGP   |
| P02457 | 208 | ASGPMGPRGPAGP   |
| P02457 | 211 | PMGPRGPAGPPGK   |
| P02457 | 214 | PRGPAGPPGKNGD   |
| P02457 | 227 | DGEAGKGRPGQR    |
| P02457 | 235 | RPGQRGPPGPQGA   |
| P02457 | 238 | QRGPPGPQGARGL   |
| P02457 | 271 | AKGQPGPAGPKGE   |
| P02457 | 274 | QPGPAGPKGEPS    |
| P02457 | 292 | APGQMGPRLPGE    |
| P02457 | 304 | ERGRPGPSGPAGA   |
| P02457 | 307 | RPGPSGPAGARGN   |
| P02457 | 322 | APGAAGPPGPTGP   |
| P02457 | 325 | AAGPPGPTGPAGP   |
| P02457 | 328 | PPGPTGPAGPPGF   |
| P02457 | 331 | PTGPAGPPGFPGA   |
| P02457 | 346 | AKGETGPQGARGS   |
| P02457 | 355 | ARGSEGPQGSERGE  |
| P02457 | 364 | SRGEPGPPGPAGA   |
| P02457 | 367 | EPGPPGPAGAAGP   |
| P02457 | 373 | PAGAAGPAGNPGA   |
| P02457 | 418 | PSGAPGPKGNSGE   |
| P02457 | 442 | AKGEPGPAGVQGP   |
| P02457 | 448 | PAGVQGP PGPAGE  |
| P02457 | 451 | VQGPPGPAGEEGK   |
| P02457 | 466 | ARGEPPAGLPGP    |
| P02457 | 472 | PAGLPGPAGERGA   |
| P02457 | 493 | ADGIAGPKGPPGE   |
| P02457 | 496 | IAGPKGPPGERGS   |
| P02457 | 508 | SPGAVGPKGSPGE   |
| P02457 | 538 | SPGSPGPDGKTGP   |
| P02457 | 544 | PDGKTGP PGPAQ   |
| P02457 | 547 | KTGPPGPAGQDGR   |
| P02457 | 556 | QDGRPGPAGPPGA   |
| P02457 | 559 | RPGPAGPPGARGQ   |
| P02457 | 574 | VMGFPGPKGAAGE   |
| P02457 | 592 | ERGAPGPPGAVGA   |
| P02457 | 610 | EAGAQQGP PGPTGP |
| P02457 | 616 | PPGPTGPAGERGE   |
| P02457 | 625 | ERGEQQPAGAPGF   |
| P02457 | 637 | FQGLPGPAGPPGE   |
| P02457 | 640 | LPGPAGPPGEAGK   |
| P02457 | 661 | NAGAPGPAGARGE   |
| P02457 | 685 | PPGPQGPRGANGA   |
| P02457 | 712 | APGNEGPPGLEGM   |
| P02457 | 739 | DRGDPGPKGADGA   |
| P02457 | 805 | PAGFAGPPGADGQ   |
| P02457 | 829 | AKGDAGPPGPAGP   |
| P02457 | 832 | DAGPPGPAGPTGA   |

---

---

|        |      |                                 |
|--------|------|---------------------------------|
| P02457 | 841  | PTGAPG <b>P</b> AGZVGA          |
| P02457 | 850  | ZVGAPG <b>P</b> KGARGS          |
| P02457 | 874  | AAGRVG <b>P</b> PGPSGN          |
| P02457 | 877  | RVGPPG <b>P</b> SGNIGL          |
| P02457 | 886  | NIGLPG <b>P</b> PGPAGK          |
| P02457 | 889  | LPGPPG <b>P</b> AGKZGS          |
| P02457 | 898  | KZGSKG <b>P</b> RGETGP          |
| P02457 | 904  | PRGETG <b>P</b> AGRPGE          |
| P02457 | 913  | RPGE <b>P</b> GPAGPPGP          |
| P02457 | 916  | EPGPAG <b>P</b> PGPPGE          |
| P02457 | 919  | PAGPPG <b>P</b> PGEEKS          |
| P02457 | 931  | SPGADG <b>P</b> IGAPGT          |
| P02457 | 938  | IGAPGT <b>P</b> GPQGIA          |
| P02457 | 940  | APGTPG <b>P</b> QGIAGQ          |
| P02457 | 967  | FPGLPG <b>P</b> SGEPGK          |
| P02457 | 976  | EPGKQG <b>P</b> SGASGE          |
| P02457 | 985  | ASGERG <b>P</b> PGPMGP          |
| P02457 | 988  | ERGPPG <b>P</b> MGPPGL          |
| P02457 | 991  | PPGPMG <b>P</b> PGLAGP          |
| P02457 | 997  | PPGLAG <b>P</b> PGEAGR          |
| P02457 | 1021 | RDGAAG <b>P</b> KGDRGE          |
| P02457 | 1030 | DRGETG <b>P</b> AGPPGA          |
| P02457 | 1043 | PGAPGAG <b>P</b> GPVGPA         |
| P02457 | 1045 | APGAPG <b>P</b> VGPAGK          |
| P02457 | 1048 | APGPVG <b>P</b> AGKNGD          |
| P02457 | 1075 | PAGARG <b>P</b> AGPQGP          |
| P02457 | 1078 | ARGPAG <b>P</b> QGPRGD          |
| P02457 | 1081 | PAGPQG <b>P</b> RGDKGE          |
| P02457 | 1108 | FSG <b>L</b> QG <b>P</b> PGPPGA |
| P02457 | 1111 | LQGPPG <b>P</b> PGAPGE          |
| P02457 | 1120 | APGEQG <b>P</b> SGASGP          |
| P02457 | 1126 | PSGASG <b>P</b> AGPRGP          |
| P02457 | 1129 | ASGPAG <b>P</b> RGPPGS          |
| P02457 | 1150 | LNGLPG <b>P</b> IGPPGP          |
| P02457 | 1156 | PIGPPG <b>P</b> RGRTGE          |
| P02457 | 1165 | RTGEVG <b>P</b> VGPPGP          |
| P02457 | 1168 | EVGPVG <b>P</b> PGPPGP          |
| P02457 | 1177 | PPGPPG <b>P</b> PGPPSG          |
| P02457 | 1180 | PPGPPG <b>P</b> PSGGFD          |
| P02457 | 1181 | PGPPGP <b>P</b> SGGFDL          |
| P02457 | 1191 | FDLSFL <b>P</b> QPPQEK          |
| P02457 | 1193 | LSFL <b>P</b> Q <b>P</b> PQEKAH |
| P02457 | 1194 | SFL <b>P</b> Q <b>P</b> PQEKAH  |
| P02457 | 1237 | IENIRS <b>P</b> EGTRKN          |
| P02457 | 1244 | EGTRKN <b>P</b> ARTCRD          |
| P02457 | 1267 | GEYWID <b>P</b> NQGCNL          |
| P02457 | 1291 | GETCVY <b>P</b> TQATIA          |
| P02457 | 1307 | WYLSKN <b>P</b> KEKKHV          |
| P02457 | 1334 | GGEGSN <b>P</b> ADVAIQ          |
| P02457 | 1427 | TKTSRL <b>P</b> IIDLAP          |
| P02457 | 1433 | PIIDLAP <b>P</b> MDVGAP         |
| P02457 | 1439 | PMDVGAP <b>P</b> DQEFGI         |
| P02457 | 1449 | FGIDIG <b>P</b> VCFL@@          |
| P0C2W2 | 21   | PGARGA <b>P</b> GPQGPS          |
| P86290 | 11   | EPGSAG <b>P</b> PGPAGL          |
| P86290 | 14   | SAGPPG <b>P</b> PAGLRGL         |
| P86290 | 21   | AGLRGL <b>P</b> GESGAV          |
| P86290 | 29   | ESGAVG <b>P</b> AGPPGS          |
| P86290 | 32   | AVGPAG <b>P</b> PGSR@@          |

---

---

|        |     |                |
|--------|-----|----------------|
| P02467 | 35  | SAGRKGPRGDKGP  |
| P02467 | 41  | PRGDKGPQGERGP  |
| P02467 | 47  | PQGERGPPGPPGR  |
| P02467 | 48  | QGERGPPGPPGRD  |
| P02467 | 50  | ERGPPGPPGRDGE  |
| P02467 | 51  | RGPPGPPGRDGED  |
| P02467 | 59  | RDGEDGPPGPPGP  |
| P02467 | 60  | DGEDGPPGPPGPP  |
| P02467 | 81  | FAAQYDPSKAADF  |
| P02467 | 89  | KAADFPGPMGLM   |
| P02467 | 91  | ADFGPGPMGLMGP  |
| P02467 | 97  | PMGLMGPRGPPGA  |
| P02467 | 100 | LMGPRGPPGASGP  |
| P02467 | 101 | MGPRGPPGASGPP  |
| P02467 | 106 | PPGASGPPGPPGF  |
| P02467 | 107 | PGASGPPGPPGFQ  |
| P02467 | 109 | ASGPPGPPGFQGV  |
| P02467 | 110 | SGPPGPPGFQGV   |
| P02467 | 116 | PGFQGVPGEPGEP  |
| P02467 | 119 | QGVPGEPGEPGQT  |
| P02467 | 122 | PGEPEGEPGQTGPQ |
| P02467 | 127 | EPGQTGPQGPRGP  |
| P02467 | 134 | QGPRGPPGPPGKA  |
| P02467 | 136 | PRGPPGPPGKAGE  |
| P02467 | 146 | AGEDGHGPKPGRP  |
| P02467 | 149 | DGHPGKPGRPGER  |
| P02467 | 152 | PGKPGRPGERGVA  |
| P02467 | 160 | ERGVAGPQGARGF  |
| P02467 | 167 | QGARGFPGTGPP   |
| P02467 | 170 | RGFPGTGPPGFK   |
| P02467 | 172 | FPGTGPPGFKGI   |
| P02467 | 173 | PGTPGPPGFKGIR  |
| P02467 | 191 | DGLTGQPGAPGTK  |
| P02467 | 194 | TGQPGAPGTKGEP  |
| P02467 | 200 | PGTKGEPGAPGEN  |
| P02467 | 203 | KGEPGAPGENGTP  |
| P02467 | 209 | PGENGTPGQPGAR  |
| P02467 | 212 | NGTPGQPGARGLP  |
| P02467 | 218 | PGARGLPGERGRI  |
| P02467 | 227 | RGRIGAPGPAGAR  |
| P02467 | 229 | RIGAPGPAGARGS  |
| P02467 | 241 | SDGSAGPTGPA@@  |
| P02467 | 267 | @@GEIGPAGNEGP  |
| P02467 | 273 | PAGNEGPTGPAGP  |
| P02467 | 276 | NEGPTGPAGPRGE  |
| P02467 | 279 | PTGPAGPRGEIGL  |
| P02467 | 286 | RGEIGLPGSSGPV  |
| P02467 | 291 | LPGSSGPPGPPGN  |
| P02467 | 294 | SSGPVGPNGNPGA  |
| P02467 | 295 | SGPVGPNGNPGAN  |
| P02467 | 298 | VGPPGNPGANGLP  |
| P02467 | 304 | PGANGLPGAKGAA  |
| P02467 | 313 | KGAAGLPGVAGAP  |
| P02467 | 319 | PGVAGAPGLPGPR  |
| P02467 | 322 | AGAPGLPGPRGIP  |
| P02467 | 324 | APGLPGPRGIPGP  |
| P02467 | 328 | PGPRGIPGPPGPA  |
| P02467 | 330 | PRGIPGPPGPAGP  |
| P02467 | 331 | RGIPGPPGPAGPS  |

---

---

|        |     |                         |
|--------|-----|-------------------------|
| P02467 | 333 | IPGPPG <b>P</b> AGPSGA  |
| P02467 | 336 | PPGPAG <b>P</b> SGARGL  |
| P02467 | 346 | RGLVGE <b>P</b> GPAGAK  |
| P02467 | 348 | LVGE <b>P</b> GPAGAKGE  |
| P02467 | 361 | SGNKGE <b>P</b> GAAGPP  |
| P02467 | 367 | PGAAG <b>P</b> PGPPGPS  |
| P02467 | 369 | AAGPP <b>P</b> PGPSGE   |
| P02467 | 370 | AGPP <b>P</b> PGPSGEE   |
| P02467 | 372 | PPGPP <b>P</b> SGEEGK   |
| P02467 | 385 | RGSNGE <b>P</b> GSAGPP  |
| P02467 | 391 | PGSAG <b>P</b> GPAGLR   |
| P02467 | 400 | AGLRGE <b>P</b> GSRGLP  |
| P02467 | 406 | PGSRGL <b>P</b> GADGRA  |
| P02467 | 417 | RAGVM <b>P</b> AGNRGA   |
| P02467 | 426 | NRGAS <b>P</b> VGAKGP   |
| P02467 | 432 | PVGAK <b>P</b> NGDAGR   |
| P02467 | 469 | @@@@G <b>F</b> PADGRV   |
| P02467 | 477 | ADGRV <b>P</b> IGPAGN   |
| P02467 | 480 | RVGP <b>P</b> IGPAGNRGE |
| P02467 | 487 | AGNRGE <b>P</b> GNIGFP  |
| P02467 | 493 | PGNIG <b>P</b> PGPKGPT  |
| P02467 | 495 | NIGFP <b>P</b> PGKPTGE  |
| P02467 | 498 | FPGP <b>P</b> KGPTGEPGK |
| P02467 | 502 | KGPTGE <b>P</b> PKPGEK  |
| P02467 | 505 | TGEP <b>P</b> KGPEKGNV  |
| P02467 | 516 | NVGLAG <b>P</b> RGAPGP  |
| P02467 | 520 | AGPRGA <b>P</b> GPEGNN  |
| P02467 | 522 | PRGAP <b>P</b> GEGNNGA  |
| P02467 | 531 | NNGAQ <b>P</b> PGVTGN   |
| P02467 | 532 | NGAQ <b>P</b> PGVTGNQ   |
| P02467 | 546 | AKGET <b>P</b> AGPPGF   |
| P02467 | 549 | ETGPAG <b>P</b> PGFQGL  |
| P02467 | 550 | TGPAG <b>P</b> PGFQGLP  |
| P02467 | 556 | PGFQGL <b>P</b> GPSGPA  |
| P02467 | 568 | AGEAG <b>P</b> KGERGLH  |
| P02467 | 580 | HGEFGV <b>P</b> GPAGPR  |
| P02467 | 582 | EFGV <b>P</b> GPAGPRGE  |
| P02467 | 585 | VGPAG <b>P</b> RGERGL   |
| P02467 | 603 | AVGPAG <b>P</b> IGSRGP  |
| P02467 | 609 | PIGSRG <b>P</b> SGPPGP  |
| P02467 | 612 | SRGPS <b>P</b> PGPDGN   |
| P02467 | 613 | RGPSG <b>P</b> PGPDGNK  |
| P02467 | 615 | PSGPP <b>P</b> PDGNKGE  |
| P02467 | 622 | DGNKGE <b>P</b> GNVGPA  |
| P02467 | 627 | EPGNV <b>P</b> GPAGPGP  |
| P02467 | 631 | VGPAG <b>P</b> GPAGPG   |
| P02467 | 633 | PAGAP <b>P</b> AGPGGI   |
| P02467 | 636 | APGPAG <b>P</b> GGIPGE  |
| P02467 | 640 | AGPGGI <b>P</b> GERGVA  |
| P02467 | 649 | RGVAGV <b>P</b> GKGGEK  |
| P02467 | 658 | KGEKG <b>P</b> GLRGDT   |
| P02467 | 676 | DGARGL <b>P</b> GAIGAP  |
| P02467 | 682 | PGAIGA <b>P</b> GPAGGA  |
| P02467 | 684 | AIGAP <b>P</b> AGGAGD   |
| P02467 | 699 | EGGPAG <b>P</b> AGPAGA  |
| P02467 | 702 | PAGPAG <b>P</b> AGARGI  |
| P02467 | 709 | AGARGI <b>P</b> GERGEP  |
| P02467 | 715 | PGERGE <b>P</b> GPVGPS  |
| P02467 | 717 | ERGE <b>P</b> GPVGPSGF  |

---

---

|        |     |               |
|--------|-----|---------------|
| P02467 | 720 | EPGPVGPSGFAGP |
| P02467 | 727 | SGFAGPPGAAGQP |
| P02467 | 733 | PGAAGQPGAQGER |
| P02467 | 741 | AKGERGPKGPKGE |
| P02467 | 744 | ERGPKGPKGETGP |
| P02467 | 750 | PKGETGPTGAIGP |
| P02467 | 756 | PTGAIGPIGASGP |
| P02467 | 762 | PIGASGPPGPVGA |
| P02467 | 763 | IGASGPPGPVGAA |
| P02467 | 765 | ASGPPGPVGAAGP |
| P02467 | 771 | PVGAAGPAGPRGD |
| P02467 | 774 | AAGPAGPRGDAGP |
| P02467 | 780 | PRGDAGPPGMTGF |
| P02467 | 781 | RGDAGPPGMTGFP |
| P02467 | 787 | PGMTGFPGAAGR  |
| P02467 | 796 | AGRVGPPGPAGIT |
| P02467 | 798 | RVGPPGPAGITGP |
| P02467 | 804 | PAGITGPPGPPGP |
| P02467 | 805 | AGITGPPGPPGPA |
| P02467 | 807 | ITGPPGPGPAGK  |
| P02467 | 808 | TGPPGPGPAGKD  |
| P02467 | 810 | PPGPPGPAGKDGP |
| P02467 | 816 | PAGKDGPRLRGD  |
| P02467 | 825 | LRGDVGPPVGRTE |
| P02467 | 837 | EQGIAGPPGFAGE |
| P02467 | 838 | QGIAGPPGFAGEK |
| P02467 | 846 | FAGEKGPSGEAGA |
| P02467 | 855 | EAGAAGPPGTPGP |
| P02467 | 856 | AGAAGPPGTPGPQ |
| P02467 | 859 | AGPPGTPGPQGIL |
| P02467 | 861 | PPGTPGPQGILGA |
| P02467 | 868 | QGILGAPGILGLP |
| P02467 | 874 | PGILGLPGSRGER |
| P02467 | 883 | RGERGLPGIAGAT |
| P02467 | 892 | AGATGEPGPLGVS |
| P02467 | 894 | ATGEPGPLGVSGP |
| P02467 | 900 | PLGVSGPPGARGP |
| P02467 | 901 | LGVSGPPGARGPS |
| P02467 | 906 | PPGARGPSGPVGS |
| P02467 | 909 | ARGPSGPVGSPPG |
| P02467 | 913 | SGPVGSPGPNAP  |
| P02467 | 915 | PVGSPGPNGAPGE |
| P02467 | 919 | PGPNAPGEAGRD  |
| P02467 | 928 | AGRDGNPGNDGPP |
| P02467 | 933 | NPGNDGPPGRDGA |
| P02467 | 934 | PGNDGPPGRDGAP |
| P02467 | 940 | PGRDGAPGFKGER |
| P02467 | 949 | KGERGAPGNPGPS |
| P02467 | 952 | RGAPGNPGPSGAL |
| P02467 | 954 | APGNPGPSGALGA |
| P02467 | 961 | SGALGAPGPHGQV |
| P02467 | 963 | ALGAPGPHGQVGP |
| P02467 | 969 | PHGQVGPSGKPGN |
| P02467 | 973 | VGPSGKPGNRGDP |
| P02467 | 979 | PGNRGDGPVGPV  |
| P02467 | 981 | NRGDGPVGPVGP  |
| P02467 | 984 | DPGPVGVPVPAGA |
| P02467 | 987 | PVGPVGPAFAFGP |
| P02467 | 993 | PAGAFGPRGLAGP |

---

---

|        |      |                 |
|--------|------|-----------------|
| P02467 | 999  | PRGLAGPQGPRGE   |
| P02467 | 1009 | RGEKGE PGDKGHR  |
| P02467 | 1018 | KGHRGL PGLKGHN  |
| P02467 | 1030 | NGLQGL PGLAQOH  |
| P02467 | 1041 | QHGDQGP PGNNGP  |
| P02467 | 1042 | HGDQGP PGNNGPA  |
| P02467 | 1047 | PPGNNGPAGPRGP   |
| P02467 | 1050 | NNGPAGPRGPPGP   |
| P02467 | 1053 | PAGPRGP PGPSGP  |
| P02467 | 1056 | PRGPPG PSGP PGK |
| P02467 | 1059 | PPGPSGP PGKDGR  |
| P02467 | 1060 | PGPSGP PGKDGRN  |
| P02467 | 1069 | DGRNGL PGPIGPA  |
| P02467 | 1071 | RNGLPGPIGPAGV   |
| P02467 | 1074 | LPGPPIGPAGVRGS  |
| P02467 | 1086 | SHGSQGPAGPPGP   |
| P02467 | 1089 | SQGPAGP PGPPGP  |
| P02467 | 1090 | QGPAGP PGPPGPP  |
| P02467 | 1101 | PPGPPG PNGGGYE  |
| P02467 | 1120 | YYRADQPSLRPKD   |
| P02467 | 1124 | DQPSLRPKDYEVD   |
| P02467 | 1146 | IETLLTPEGSKKN   |
| P02467 | 1165 | DLRLSHPEWSSGF   |
| P02467 | 1176 | GFYWIDPNQGCTA   |
| P02467 | 1206 | ASLEDIPTKTWYV   |
| P02467 | 1216 | WYVSKNPKDKKHI   |
| P02467 | 1332 | EYRTNKPSRLPIL   |
| P02467 | 1336 | NKPSRLPILDIAP   |
| P02467 | 1342 | PILDIAPLDIGGA   |
| P02467 | 1358 | FGLHIGPVCFK@@   |
| P56711 | 38   | FLSKRKPSAERWR   |
| P05539 | 7    | MIRLGAPQSLVLL   |
| P05539 | 33   | DARKLGPKGQKGE   |
| P05539 | 40   | KGQKGE PGDIKDI  |
| P05539 | 49   | IKDIIIGPKGPPGP  |
| P05539 | 52   | IIGPKGPPGPQGP   |
| P05539 | 53   | IGPKGPPGPQGPA   |
| P05539 | 55   | PKGPPGPQGPAGE   |
| P05539 | 58   | PPGPQG PAGEQGP  |
| P05539 | 64   | PAGEQGPRGDRGD   |
| P05539 | 77   | KGERGAPGPRGRD   |
| P05539 | 86   | RGRDGE PGTPGNP  |
| P05539 | 89   | DGEPGT PGNPGPP  |
| P05539 | 94   | TPGNPGPPGPPGP   |
| P05539 | 134  | MGVMQGP MGPMGP  |
| P05539 | 137  | MQGPMGPMGPRGP   |
| P05539 | 144  | MGPRGPPGPAGAP   |
| P05539 | 150  | PGPAGAPGPQGFQ   |
| P05539 | 162  | QGNPGE PGE PGVS |
| P05539 | 165  | PGE PGE PGVSGPI |
| P05539 | 183  | PGPAGK PGDDGEA  |
| P05539 | 192  | DGEAGK PGKAGER  |
| P05539 | 201  | AGERGL PGPQGAR  |
| P05539 | 216  | PGTPGL PGVKGHR  |
| P05539 | 225  | KGHRGY PGLDGAK  |
| P05539 | 237  | KGEAGAPGVKGES   |
| P05539 | 246  | KGESGS PGENGSP  |
| P05539 | 252  | PGENGSPGPMGPR   |
| P05539 | 254  | ENGSPGPMGPRGL   |

---



---

|        |     |                |
|--------|-----|----------------|
| P05539 | 261 | MGPRGLPGERGRT  |
| P05539 | 269 | ERGRTGPAAGA    |
| P05539 | 282 | RGNDGQPGPAGPP  |
| P05539 | 284 | NDGQPGPAGPPGP  |
| P05539 | 287 | QPGPAGPPGPVGP  |
| P05539 | 288 | PGPAGPPGPVGP   |
| P05539 | 290 | PAGPPGPVGPAGG  |
| P05539 | 297 | VGPAGGPGFLGAP  |
| P05539 | 303 | PGFLGAPGAKGEA  |
| P05539 | 311 | AKGEAGPTGARGP  |
| P05539 | 317 | PTGARGPEGAQGS  |
| P05539 | 327 | QGSRGEPGNPGSP  |
| P05539 | 330 | RGEPPGNPGSPGPA |
| P05539 | 333 | PGNPGSPGPAGAS  |
| P05539 | 335 | NPGSPGPAGASGN  |
| P05539 | 342 | AGASGNPGTDGIP  |
| P05539 | 348 | PGTDGIPGAKGSA  |
| P05539 | 357 | KGSAGAPGIAGAP  |
| P05539 | 372 | PGPRGPPGPQGAT  |
| P05539 | 374 | PRGPPGPQGATGP  |
| P05539 | 380 | PQGATGPLGPKGQ  |
| P05539 | 383 | ATGPLGPKGQTGE  |
| P05539 | 390 | KGQTGEPIAGFK   |
| P05539 | 401 | FKGEQGPKGETGP  |
| P05539 | 407 | PKGETGPAGPQGA  |
| P05539 | 414 | AGPQGA PGPAGEE |
| P05539 | 429 | RGARGE PGGAGPI |
| P05539 | 437 | GAGPIGP PGERGA |
| P05539 | 438 | AGPIGP PGERGAP |
| P05539 | 444 | PGERGAPGNRGFP  |
| P05539 | 450 | PGNRGFPQDGLA   |
| P05539 | 458 | QDGLAGPKGAPGE  |
| P05539 | 462 | AGPKGAPGERGPS  |
| P05539 | 467 | APGERGPSGLAGP  |
| P05539 | 473 | PSGLAGPKGANGD  |
| P05539 | 480 | KGANGDPGRPGEP  |
| P05539 | 483 | NGDPGRPGEPLP   |
| P05539 | 486 | PGRPGEPLPGAR   |
| P05539 | 489 | PGEPLPGARGLT   |
| P05539 | 498 | RGLTGRPGDAGPQ  |
| P05539 | 503 | RPGDAGPQKVG    |
| P05539 | 509 | PQKVGPSGAPGE   |
| P05539 | 513 | VGPSGAPGEDGRP  |
| P05539 | 519 | PGEDGRP PPGPQ  |
| P05539 | 521 | EDGRP PPGPQGA  |
| P05539 | 522 | DGRP PPGPQGAR  |
| P05539 | 531 | QGARGQPGVMGFP  |
| P05539 | 537 | PGVMGFPGPKGAN  |
| P05539 | 546 | KGANGE PGKAGEK |
| P05539 | 558 | KGLAGAPGLRGLP  |
| P05539 | 564 | PGLRGLPGKDGET  |
| P05539 | 576 | TGAAGPPGPSGPA  |
| P05539 | 591 | RGEQGA PGPSGFQ |
| P05539 | 593 | EQGAPGPSGFQGL  |
| P05539 | 600 | SGFQGLPGPPGPP  |
| P05539 | 603 | QGLPGP PPGPEG  |
| P05539 | 606 | PGPPGP PPEGGKQ |
| P05539 | 618 | QGDQGI PGEAGAP |
| P05539 | 629 | APGLVGPRGERGF  |

---

---

|        |      |                          |
|--------|------|--------------------------|
| P05539 | 636  | RGERGF <b>P</b> GERGSP   |
| P05539 | 642  | PGERGS <b>P</b> GAQGLQ   |
| P05539 | 650  | AQGLQG <b>P</b> RGLPGT   |
| P05539 | 654  | QGPRGL <b>P</b> GTPGTD   |
| P05539 | 657  | RGLPGT <b>P</b> GTDGPK   |
| P05539 | 662  | TPGTDG <b>P</b> KGAAGP   |
| P05539 | 668  | PKGAAG <b>P</b> DGPPGA   |
| P05539 | 671  | AAGPDG <b>P</b> PGAQGP   |
| P05539 | 672  | AGPDGP <b>P</b> GAQGPP   |
| P05539 | 677  | PPGAQG <b>P</b> PGLQGM   |
| P05539 | 678  | PGAQGP <b>P</b> PGLQGMP  |
| P05539 | 684  | PGLQGM <b>P</b> GERGAA   |
| P05539 | 695  | AAGIAG <b>P</b> KGDRGD   |
| P05539 | 707  | DVGEKG <b>P</b> EGAPGK   |
| P05539 | 711  | KGPEGAP <b>P</b> KDGGR   |
| P05539 | 726  | TGPIGP <b>P</b> GPAGAN   |
| P05539 | 740  | EKGEVG <b>P</b> PGPSGS   |
| P05539 | 741  | KGEVGP <b>P</b> PGPSGST  |
| P05539 | 743  | EVGPPG <b>P</b> SGSTGA   |
| P05539 | 753  | TGARGA <b>P</b> GERGET   |
| P05539 | 761  | ERGETG <b>P</b> PGPAGF   |
| P05539 | 762  | RGETGP <b>P</b> GPAGFA   |
| P05539 | 777  | PGADGQ <b>P</b> GAKGDQ   |
| P05539 | 795  | KGDAGAP <b>P</b> GPQGPS  |
| P05539 | 797  | DAGAPG <b>P</b> QGPSGA   |
| P05539 | 804  | QGPSGAP <b>P</b> GPQGPT  |
| P05539 | 806  | PSGAPG <b>P</b> QGP TG V |
| P05539 | 809  | APGPQG <b>P</b> TGVTGP   |
| P05539 | 815  | PTGVTG <b>P</b> KGARGA   |
| P05539 | 825  | RGAQGP <b>P</b> GATGFP   |
| P05539 | 840  | AGRVGP <b>P</b> GSNGNP   |
| P05539 | 846  | PGSNGN <b>P</b> GPAGPP   |
| P05539 | 848  | SNGNPG <b>P</b> AGPPGP   |
| P05539 | 870  | RGDTGA <b>P</b> GRAGDP   |
| P05539 | 876  | PGRAGD <b>P</b> PGLQGPA  |
| P05539 | 881  | DPGLQG <b>P</b> PAGAPGE  |
| P05539 | 885  | QGPAGAP <b>P</b> GEEKGEP |
| P05539 | 891  | PGEKGE <b>P</b> GDDGPS   |
| P05539 | 896  | EPGDDG <b>P</b> SGSDGP   |
| P05539 | 902  | PSGSDG <b>P</b> PGPQGL   |
| P05539 | 903  | SGSDGP <b>P</b> GPQGLA   |
| P05539 | 905  | SDGPPG <b>P</b> QGLAGQ   |
| P05539 | 918  | RGIVGL <b>P</b> GQRGER   |
| P05539 | 927  | RGERGF <b>P</b> PGLPGPS  |
| P05539 | 930  | RGFPGL <b>P</b> GPSGEP   |
| P05539 | 936  | PGPSGE <b>P</b> GKQGAP   |
| P05539 | 942  | PGKQGA <b>P</b> GASGDR   |
| P05539 | 951  | SGDRGP <b>P</b> GPVGPP   |
| P05539 | 957  | PGPVGP <b>P</b> PGLTGPA  |
| P05539 | 962  | PPGLTG <b>P</b> PAGEPGR  |
| P05539 | 966  | TGPAGE <b>P</b> GREGSP   |
| P05539 | 972  | PGREGS <b>P</b> GADGPP   |
| P05539 | 999  | TGALGA <b>P</b> GAPGPP   |
| P05539 | 1002 | LGAPGA <b>P</b> GPPGSP   |
| P05539 | 1004 | APGAPG <b>P</b> PGSPGP   |
| P05539 | 1005 | PGAPGP <b>P</b> GSPGPA   |
| P05539 | 1008 | PGPPGS <b>P</b> GPAGPT   |
| P05539 | 1010 | PPGSPG <b>P</b> AGPTGK   |
| P05539 | 1013 | SPGPAG <b>P</b> TGKQGD   |

---

---

|        |      |                                 |
|--------|------|---------------------------------|
| P05539 | 1031 | AQGPMG <b>P</b> SGPAGA          |
| P05539 | 1056 | KGEAGE <b>P</b> GERGLK          |
| P05539 | 1074 | TGLQGL <b>P</b> GPPGPS          |
| P05539 | 1077 | QGL <b>P</b> G <b>P</b> GPSGDQ  |
| P05539 | 1079 | LP <b>G</b> PP <b>P</b> SGDQGT  |
| P05539 | 1088 | DQGTSG <b>P</b> AGPSGP          |
| P05539 | 1091 | TS <b>G</b> PAG <b>P</b> SGPRGP |
| P05539 | 1094 | PAGPS <b>G</b> PRGPPGP          |
| P05539 | 1103 | PPGPV <b>G</b> PSGKDGS          |
| P05539 | 1113 | DGSNGI <b>P</b> GPIGPP          |
| P05539 | 1119 | PGPI <b>G</b> PPGPRGRS          |
| P05539 | 1130 | RSGET <b>G</b> PAGPPGN          |
| P05539 | 1137 | AGPPGN <b>P</b> GPPGPP          |
| P05539 | 1146 | PGPP <b>G</b> PPGPGIDM          |
| P05539 | 1148 | PPGPP <b>G</b> PGIDMSA          |
| P05539 | 1165 | GQREK <b>G</b> PDPLQYM          |
| P05539 | 1167 | REKGP <b>D</b> PLQYMRA          |
| P05539 | 1204 | IESIRS <b>P</b> DGSRKN          |
| P05539 | 1211 | DGSRKN <b>P</b> ARTCQD          |
| P05539 | 1223 | DLKLCH <b>P</b> EWKSGD          |
| P05539 | 1258 | GESCV <b>P</b> NPATVP           |
| P05539 | 1260 | SCV <b>P</b> NPATVPRK           |
| P05539 | 1264 | PNPATV <b>P</b> RKNWWS          |
| P05539 | 1300 | GDGNLA <b>P</b> NTANVQ          |
| P05539 | 1393 | QKTSRL <b>P</b> IVDIAP          |
| P05539 | 1399 | PIVDIA <b>P</b> MDIGGP          |
| P05539 | 1405 | PMDIG <b>G</b> PDQEFQV          |
| P05997 | 10   | NWAEAR <b>P</b> LLILIV          |
| P05997 | 56   | NRDIWK <b>P</b> APCQIC          |
| P05997 | 85   | VLDCAD <b>P</b> VTTPGE          |
| P05997 | 88   | CADPVT <b>P</b> PGECCP          |
| P05997 | 89   | ADPVT <b>P</b> PGECCPV          |
| P05997 | 94   | PPGECC <b>P</b> VCSQTP          |
| P05997 | 100  | PVCSQ <b>T</b> PGGGNTN          |
| P05997 | 118  | KGQK <b>G</b> E <b>P</b> GLVPVV |
| P05997 | 122  | GEPGLV <b>P</b> VVTGIR          |
| P05997 | 131  | TGIRGR <b>P</b> GPAGPP          |
| P05997 | 133  | IRGR <b>P</b> GPAGPPGS          |
| P05997 | 136  | RPGPAG <b>P</b> PGSQGP          |
| P05997 | 137  | PGPAG <b>P</b> PGSQGPR          |
| P05997 | 142  | PPGSQ <b>G</b> PRGERGP          |
| P05997 | 148  | PRGER <b>G</b> PKGRPGP          |
| P05997 | 152  | RGPKGR <b>P</b> GPRGPQ          |
| P05997 | 154  | PKGR <b>P</b> GPRGPQGI          |
| P05997 | 157  | RPGPR <b>G</b> PQGIDGE          |
| P05997 | 164  | QGID <b>G</b> EPGVPGQP          |
| P05997 | 167  | DGE <b>P</b> GVPGQPGAP          |
| P05997 | 170  | PGV <b>P</b> GQPGAPGPP          |
| P05997 | 175  | QPGAP <b>G</b> PPGHPSH          |
| P05997 | 176  | PGAP <b>G</b> PPGHPSHP          |
| P05997 | 179  | PGPP <b>G</b> HPSHGPDP          |
| P05997 | 182  | PGHPS <b>H</b> PGPDGLS          |
| P05997 | 184  | HPSHP <b>G</b> PDGLSRP          |
| P05997 | 190  | PDGLSR <b>P</b> FSAQMA          |
| P05997 | 212  | SQVGL <b>M</b> PGSVGPV          |
| P05997 | 217  | MPGS <b>V</b> G <b>P</b> VGPRGP |
| P05997 | 220  | SVGP <b>V</b> GPRGPQGL          |
| P05997 | 223  | PVGPR <b>G</b> PQGLQGQ          |
| P05997 | 235  | QQGG <b>A</b> G <b>P</b> TGPPGE |

---

---

|        |     |                |
|--------|-----|----------------|
| P05997 | 238 | GAGPTGPPGEPGD  |
| P05997 | 239 | AGPTGPPGEPGDP  |
| P05997 | 242 | TGPPGEPGDPGPM  |
| P05997 | 245 | PGEPGDGPMPGI   |
| P05997 | 259 | SRGPEGPPGKPGE  |
| P05997 | 260 | RGPEGPPGKPGED  |
| P05997 | 263 | EGPPGKPGEDGE   |
| P05997 | 269 | PGEDGEPPGRNGNP |
| P05997 | 275 | PGRNGNPGEVGFA  |
| P05997 | 284 | VGFAGPSGARGFP  |
| P05997 | 290 | PGARGFPAGPLP   |
| P05997 | 293 | RGFPAGPLPGLK   |
| P05997 | 310 | HKGLEGPKEVGGA  |
| P05997 | 317 | KGEVGAPGSKGEA  |
| P05997 | 325 | SKGEAGPTGPMGA  |
| P05997 | 328 | EAGPTGPMGAMGP  |
| P05997 | 334 | PMGAMGPLGPRGM  |
| P05997 | 337 | AMGPLGPRGMPGE  |
| P05997 | 341 | LGPRGMPGERGRL  |
| P05997 | 349 | ERGRLGPGAPGQ   |
| P05997 | 353 | LGPGAGPGQGAH   |
| P05997 | 362 | RGAHGMPGKPGPM  |
| P05997 | 365 | HGMPGKPGPMGPL  |
| P05997 | 367 | MPGKPGPMGPLGI  |
| P05997 | 370 | KPGPMGPLGIPGS  |
| P05997 | 374 | MGPLGIPGSSGFP  |
| P05997 | 380 | PGSSGFPGNPGMK  |
| P05997 | 383 | SGFPGNPGMKGEA  |
| P05997 | 409 | QRGETGPPGPVGS  |
| P05997 | 410 | RGETGPPGPVGSP  |
| P05997 | 412 | ETGPPGPVGSPGL  |
| P05997 | 416 | PGPVGSPGLPGAI  |
| P05997 | 419 | VGSPGLPGAIGTD  |
| P05997 | 428 | IGTDGTPGAKGPT  |
| P05997 | 433 | TPGAKGPTGSPGT  |
| P05997 | 437 | KGPTGSPGTSGPP  |
| P05997 | 442 | SPGTSGPPGSAGP  |
| P05997 | 443 | PGTSGPPGSAGPP  |
| P05997 | 448 | PPGSAGPPGSPGP  |
| P05997 | 449 | PGSAGPPGSPGPQ  |
| P05997 | 452 | AGPPGSPGPQGST  |
| P05997 | 454 | PPGSPGPQGSTGP  |
| P05997 | 460 | PQGSTGPQGIRGQ  |
| P05997 | 467 | QGIRGQPGDPGVP  |
| P05997 | 470 | RGQPGDPGVPGFK  |
| P05997 | 473 | PGDPGVPGFKGEA  |
| P05997 | 485 | AGPKGEPGPHGIQ  |
| P05997 | 487 | PKGEPGPHGIQGP  |
| P05997 | 493 | PHGIQGPIGPPGE  |
| P05997 | 496 | IQGPIGPGEEGK   |
| P05997 | 497 | QGPIGPGEEGKR   |
| P05997 | 505 | EEGKRGRGDPGT   |
| P05997 | 509 | RGPRGDPGTVGPP  |
| P05997 | 514 | DPGTVGPPGPVGE  |
| P05997 | 515 | PGTVGPPGPVGER  |
| P05997 | 517 | TVGPPGPVGERGA  |
| P05997 | 536 | PGSDGLPGPKGAQ  |
| P05997 | 538 | SDGLPGPKGAQGE  |
| P05997 | 547 | AQGERGPVGSSGP  |

---

---

|        |     |               |
|--------|-----|---------------|
| P05997 | 553 | PVGSSGPKGSQGD |
| P05997 | 578 | RGLTGNPGVQGPE |
| P05997 | 583 | NPGVQGPPEGKLG |
| P05997 | 589 | PEGKLGPLGAPGE |
| P05997 | 601 | EDGRPGPPGSIGI |
| P05997 | 602 | DGRPGPPGSIGIR |
| P05997 | 611 | IGIRGQPGSMGLP |
| P05997 | 617 | PGSMGLPGPKGSS |
| P05997 | 619 | SMGLPGPKGSSGD |
| P05997 | 626 | KGSSGDPGKPGEA |
| P05997 | 629 | SGDPGKPGEAGNA |
| P05997 | 638 | AGNAGVPGQRGAP |
| P05997 | 644 | PGQRGAPGKDGEV |
| P05997 | 652 | KDGEVGPSPVGP  |
| P05997 | 655 | EVGPSGPVGPPL  |
| P05997 | 658 | PSGPVGPPLAGE  |
| P05997 | 659 | SGPVGPPLAGER  |
| P05997 | 692 | PGEKGKPGDQGV  |
| P05997 | 698 | PGDQGVPGDPGAV |
| P05997 | 701 | QGVPGDPGAVGPL |
| P05997 | 706 | DPGAVGPLGPRGE |
| P05997 | 709 | AVGPLGPRGERGN |
| P05997 | 722 | PGERGEPGITGLP |
| P05997 | 728 | PGITGLPGEKGMA |
| P05997 | 739 | MAGGHGPDGPKGS |
| P05997 | 742 | GHGPDGPKGSPGP |
| P05997 | 746 | DGPKGSPGPSGTP |
| P05997 | 748 | PKGSPGPSGTPGD |
| P05997 | 752 | PGPSGTPGDTGPP |
| P05997 | 757 | TPGDTGPPLQGM  |
| P05997 | 773 | RGIAGTPGPKGDR |
| P05997 | 775 | IAGTPGPKGDRGG |
| P05997 | 800 | DGARGLPGPLGPP |
| P05997 | 802 | ARGLPGPLGPPGP |
| P05997 | 805 | LPGPLGPPLGAGP |
| P05997 | 808 | PLGPPGPAGPTGE |
| P05997 | 811 | PPGPAGPTGEKGE |
| P05997 | 818 | TGEKGEPPRGLV  |
| P05997 | 820 | EKGEPGPRGLVGP |
| P05997 | 826 | PRGLVGPGPSRGN |
| P05997 | 827 | RGLVGPGPSRGNP |
| P05997 | 833 | GPSRGNGPSRGEN |
| P05997 | 841 | SRGENGPTGAVGF |
| P05997 | 850 | AVGFAGPQGPDGQ |
| P05997 | 853 | FAGPQGPDGQPGV |
| P05997 | 857 | QGPDGQPGVKGEP |
| P05997 | 863 | PGVKGEPGEPGQK |
| P05997 | 866 | KGEPGEPGQKGDA |
| P05997 | 875 | KGDAGSPGPQGLA |
| P05997 | 877 | DAGSPGPQGLAGS |
| P05997 | 884 | QGLAGSPGPHGPN |
| P05997 | 886 | LAGSPGPHGPNGV |
| P05997 | 889 | SPGPHGPNGVPGL |
| P05997 | 893 | HGPNGVPGLKGGR |
| P05997 | 904 | GRGTQGPATGF   |
| P05997 | 931 | APGPAGPLGEPGK |
| P05997 | 935 | AGPLGEPGKEGPP |
| P05997 | 940 | EPGKEGPGLRGD  |
| P05997 | 941 | PGKEGPPGLRGDP |

---

---

|        |      |                        |
|--------|------|------------------------|
| P05997 | 947  | PGLRGD <b>P</b> SGHGRV |
| P05997 | 958  | RVGDRG <b>P</b> AGPPGG |
| P05997 | 961  | DRGPAG <b>P</b> PGGPGD |
| P05997 | 962  | RGPAG <b>P</b> PGGPGDK |
| P05997 | 965  | AGPPGG <b>P</b> GDKGDP |
| P05997 | 971  | PGDKGD <b>P</b> GEDGQP |
| P05997 | 977  | PGEDGQ <b>P</b> PGDGPP |
| P05997 | 982  | QPGPDG <b>P</b> PGPAGT |
| P05997 | 983  | PGPDGP <b>P</b> GPAGTT |
| P05997 | 985  | PDGPPG <b>P</b> AGTTGQ |
| P05997 | 1010 | RGMPGL <b>P</b> GPAGTP |
| P05997 | 1012 | MPGLPG <b>P</b> AGTPGK |
| P05997 | 1016 | PGPAGT <b>P</b> GKVGPT |
| P05997 | 1021 | TPGKVG <b>P</b> TGATGD |
| P05997 | 1030 | ATGDKG <b>P</b> PGPVGP |
| P05997 | 1033 | DKGPPG <b>P</b> VGPPTS |
| P05997 | 1036 | PPGPVG <b>P</b> PGSNGP |
| P05997 | 1037 | PGPVGP <b>P</b> GSNGPV |
| P05997 | 1042 | PPGSNG <b>P</b> VGEPPG |
| P05997 | 1046 | NGPVGE <b>P</b> GPEGPA |
| P05997 | 1048 | PVGEPP <b>P</b> EGPAGN |
| P05997 | 1051 | EPGPEG <b>P</b> AGNDGT |
| P05997 | 1058 | AGNDGT <b>P</b> GRDGAV |
| P05997 | 1073 | RGDRGD <b>P</b> GPAGLP |
| P05997 | 1075 | DRGDGP <b>P</b> AGLPGS |
| P05997 | 1079 | PGPAGL <b>P</b> GSQGAP |
| P05997 | 1085 | PGSQGA <b>P</b> GTPGPV |
| P05997 | 1088 | QGAPGT <b>P</b> GPVGAP |
| P05997 | 1090 | APGTPG <b>P</b> VGAPGD |
| P05997 | 1094 | PGPVGA <b>P</b> GDAGQR |
| P05997 | 1103 | AGQRGD <b>P</b> GSRGPI |
| P05997 | 1108 | DPSRG <b>P</b> IGPPGR  |
| P05997 | 1111 | SRGPIG <b>P</b> PGRAGK |
| P05997 | 1112 | RGPIGP <b>P</b> PGRAGK |
| P05997 | 1123 | KRGLPG <b>P</b> QGPRGD |
| P05997 | 1126 | LPGPQG <b>P</b> RGDKGD |
| P05997 | 1159 | LPGPPG <b>P</b> NGEQGS |
| P05997 | 1169 | QGSAGI <b>P</b> GPFGPR |
| P05997 | 1171 | SAGIPG <b>P</b> FGPRGP |
| P05997 | 1174 | IPGPFG <b>P</b> RGPPGP |
| P05997 | 1178 | FGPRGP <b>P</b> GPVGPS |
| P05997 | 1190 | SGKEGN <b>P</b> GPLGPI |
| P05997 | 1192 | KEGNPG <b>P</b> LGPIGP |
| P05997 | 1195 | NPGPLG <b>P</b> IGPPGV |
| P05997 | 1198 | PLGPIG <b>P</b> PGVRGS |
| P05997 | 1199 | LGPIGP <b>P</b> PGVRGS |
| P05997 | 1210 | SVGEAG <b>P</b> EGPPGE |
| P05997 | 1213 | EAGPEG <b>P</b> PGEPGP |
| P05997 | 1225 | PPGPPG <b>P</b> PGHLTA |
| P05997 | 1226 | PGPPGP <b>P</b> PGHLTA |
| P05997 | 1245 | HYDESM <b>P</b> DPLPEF |
| P05997 | 1247 | DESM <b>P</b> DPLPEFTE |
| P05997 | 1249 | SMPDPL <b>P</b> EFTEDQ |
| P05997 | 1258 | TEDQA <b>P</b> DDKNKT  |
| P05997 | 1266 | DKNKTD <b>P</b> GVHATL |
| P05997 | 1285 | IETMRS <b>P</b> DGSKKH |
| P05997 | 1292 | DGSKKH <b>P</b> ARTCDD |
| P05997 | 1315 | GEYWID <b>P</b> NQGSVE |
| P05997 | 1341 | TCISAN <b>P</b> SSVPRK |

---

---

|        |      |                |
|--------|------|----------------|
| P05997 | 1345 | ANPSSVPRKTWWA  |
| P05997 | 1355 | WWASKSPDNKPVW  |
| P05997 | 1359 | KSPDNKPVWYGLD  |
| P05997 | 1380 | YGDHQSNTAITQ   |
| P05997 | 1473 | QNVARLPIIDLAP  |
| P05997 | 1479 | PIIDLAPVDVGGT  |
| P05997 | 1495 | FGVEIGPVCFV@@  |
| P12108 | 6    | @MAHRSPALCLLL  |
| P12108 | 26   | LAQLRGPPGEPGP  |
| P12108 | 27   | AQLRGPPGEPGPR  |
| P12108 | 30   | RGPPGEPGPRGPP  |
| P12108 | 36   | PGPRGPPGPPGVP  |
| P12108 | 39   | RGPPGPPGVPGAD  |
| P12108 | 42   | PGPPGVPGADGID  |
| P12108 | 54   | DGDKGS PGAPGSP |
| P12108 | 57   | KGSPGAPGSPGAK  |
| P12108 | 60   | PGAPGSPGAKGEP  |
| P12108 | 66   | PGAKGEPGAPGPD  |
| P12108 | 69   | KGEPGAPGPDGPP  |
| P12108 | 71   | EPGAPGPDGPPGK  |
| P12108 | 74   | APGPDGPPGKPGL  |
| P12108 | 75   | PGPDGPPGKPGLD  |
| P12108 | 78   | DGPPGKPGLDGLT  |
| P12108 | 92   | AKGSRGPWGGQGL  |
| P12108 | 102  | QGLKGQPGLPGPP  |
| P12108 | 108  | PGLPGPPGLPGPS  |
| P12108 | 111  | PGPPGLPGPSLPG  |
| P12108 | 113  | PPGLPGPSLPGPP  |
| P12108 | 116  | LPGPSLPGPPGLP  |
| P12108 | 118  | GPSLPGPPGLPGQ  |
| P12108 | 119  | PSLPGPPGLPGQV  |
| P12108 | 122  | PGPPGLPGQVGLP  |
| P12108 | 128  | PGQVGLPGEIGVP  |
| P12108 | 134  | PGEIGVPGPKGDP  |
| P12108 | 136  | EIGVPGPKGDGP   |
| P12108 | 140  | PGPKGDGPDGPR   |
| P12108 | 142  | PKGDGPDGPRGP   |
| P12108 | 152  | RGPPGPPGKPGPP  |
| P12108 | 155  | PGPPGKPGPPGHI  |
| P12108 | 157  | PPGKPGPPGHIQG  |
| P12108 | 173  | SADFLCPTNCPPG  |
| P12108 | 177  | LCPTNCPGPKGP   |
| P12108 | 180  | TNCPPGPKGPQGL  |
| P12108 | 183  | PPGPKGPQGLQGL  |
| P12108 | 196  | KGHRGRPGALGEP  |
| P12108 | 202  | PGALGEPGQQGKQ  |
| P12108 | 210  | QQGKQGPKGDVGV  |
| P12108 | 223  | SGEQGVPGPPGPQ  |
| P12108 | 225  | EQGVPGPPGPQGQ  |
| P12108 | 226  | QGVPGPPGPQQR   |
| P12108 | 228  | VPGPPGPQGQRGY  |
| P12108 | 235  | QQQRGYPGMAGPK  |
| P12108 | 240  | YPMAGPKGETGP   |
| P12108 | 246  | PKGETGPAGYKGM  |
| P12108 | 262  | IGAAGRPGREGPK  |
| P12108 | 267  | RPGREGPKGPPGD  |
| P12108 | 270  | REGPKGPPGDPGE  |
| P12108 | 271  | EGPKGPPGDPGEK  |
| P12108 | 274  | KGPPGDGPEKGEL  |

---



---

|        |     |                  |
|--------|-----|------------------|
| P12108 | 288 | GRGIRGPQGDIGP    |
| P12108 | 294 | PQGDIGPKGDMGL    |
| P12108 | 301 | KGDMGLPGIDGKD    |
| P12108 | 310 | DGKDGTPGIPGVK    |
| P12108 | 313 | DGTPGI PGVKGT A  |
| P12108 | 322 | KG TAGQ PGRPGPP  |
| P12108 | 325 | AGQPGRPGPPGHR    |
| P12108 | 327 | QPGRPGPGHRGQ     |
| P12108 | 328 | PGRPGPGHRGQA     |
| P12108 | 337 | RGQAGLPGQPGSK    |
| P12108 | 340 | AGLPGQPGSKGGP    |
| P12108 | 346 | PGSKGGPGDKGEV    |
| P12108 | 364 | QGITGT PGLDGE P  |
| P12108 | 370 | PGLDGEPGPPGDA    |
| P12108 | 372 | LDGE PGPGDAGT    |
| P12108 | 373 | DGE PGPGDAGTA    |
| P12108 | 382 | AGTAGV PGLKGDR   |
| P12108 | 393 | DRGERG PVGAPGE   |
| P12108 | 397 | RGPVGAPGEAGQS    |
| P12108 | 405 | EAGQSGPKGEQGP    |
| P12108 | 411 | PKGEQGP PGIPGP   |
| P12108 | 412 | KGEQGP PGIPGPQ   |
| P12108 | 415 | QGPPGI PG PQGLP  |
| P12108 | 417 | PPGIPGPQGLPGV    |
| P12108 | 421 | PG PQGL PGVKGD K |
| P12108 | 430 | KGDKGS PGKTGPK   |
| P12108 | 435 | SPGKTG PKGSTGD   |
| P12108 | 442 | KGSTGD PGVHGLA   |
| P12108 | 460 | KGESGE PGPKGQQ   |
| P12108 | 462 | ESGE PG PKGQQGI  |
| P12108 | 475 | QGELGF PGPSGDA   |
| P12108 | 477 | ELGF PGPSDAGS    |
| P12108 | 484 | SGDAGS PGVRGYP   |
| P12108 | 490 | PGVRGY PGPPGPR   |
| P12108 | 492 | VRGY PGPPGPRGL   |
| P12108 | 493 | RGYP GP PGPRGLL  |
| P12108 | 495 | YPGPPG PRGLLGE   |
| P12108 | 505 | LGERGV PGMPGQR   |
| P12108 | 508 | RGVPGM PGQRGVA   |
| P12108 | 555 | GVGAMG PGPPGP    |
| P12108 | 556 | VGAMG PGPPGPP    |
| P12108 | 558 | AMGPPG PGPPGP    |
| P12108 | 564 | PPGPPG PG EQGL   |
| P12108 | 565 | PGPPGP PG EQGLH  |
| P12108 | 573 | EQGLHG PMGPRGV   |
| P12108 | 576 | LHGPMG PRGVPGL   |
| P12108 | 580 | MGPRGV PGLLGAA   |
| P12108 | 594 | QIGNIG PKGKRGE   |
| P12108 | 612 | DTGRGH PGMPGPP   |
| P12108 | 615 | RGHPGM PGPPGIP   |
| P12108 | 617 | HPGMPG PGIPGL    |
| P12108 | 618 | PGMPGP PGIPGLP   |
| P12108 | 621 | PGPPGI PGLPGIP   |
| P12108 | 624 | PGIPGL PGIPGHA   |
| P12108 | 627 | PGLPGI PGHALAG   |
| P12108 | 640 | KDGERG PGVPGD    |
| P12108 | 641 | DGERGP PGVPGDA   |
| P12108 | 644 | RGPPGV PGDAGRP   |
| P12108 | 650 | PGDAGR PGSPGPA   |

---

---

|        |     |                 |
|--------|-----|-----------------|
| P12108 | 653 | AGRPGSPGPAGLP   |
| P12108 | 655 | RPGSPGPAGLPGF   |
| P12108 | 659 | PGPAGLPGFCEPA   |
| P12108 | 664 | LPGFCEPAACLG    |
| P12108 | 672 | ACLGALPTPRHG@   |
| A6YR20 | 15  | VLLLLLLPYGDLIT  |
| A6YR20 | 34  | AARKVTPWRRNLK   |
| Q05707 | 14  | MRYWLLPPFLAIV   |
| Q05707 | 15  | RYWLLPPFLAIVY   |
| Q05707 | 32  | VQGQVAPPTRLRY   |
| Q05707 | 33  | QGQVAPPTRLRYN   |
| Q05707 | 53  | QISWKA PRGKF GG |
| Q05707 | 66  | YKLLVTPTSGGKT   |
| Q05707 | 91  | IIQGLMPDQNYTV   |
| Q05707 | 110 | KDKESKPAQGQFR   |
| Q05707 | 126 | LEKRKDPKPRVKV   |
| Q05707 | 128 | KRKDPKPRVKVVD   |
| Q05707 | 141 | RGNGSRPSSPEEV   |
| Q05707 | 144 | GSRPSSPEEVKFV   |
| Q05707 | 154 | KFVCQT PAIADIV  |
| Q05707 | 206 | AQYSGDPRIEWHL   |
| Q05707 | 229 | EAVRNLPYKGGNT   |
| Q05707 | 251 | FENSFKPEAGSRT   |
| Q05707 | 277 | SQDDII PPSRNL R |
| Q05707 | 278 | QDDII PPSRNL RE |
| Q05707 | 309 | QEIASEPDSTHVY   |
| Q05707 | 355 | AHAITGPTELIT    |
| Q05707 | 356 | HAITGPTELITS    |
| Q05707 | 377 | VNWT HAPGNVEKY  |
| Q05707 | 389 | YRVVYYPTRGGKP   |
| Q05707 | 395 | PTRGGKPDEVVVD   |
| Q05707 | 444 | ETTLALPMASDLL   |
| Q05707 | 467 | VKWDAPGASGYL    |
| Q05707 | 478 | YLILYAPLTEGLA   |
| Q05707 | 506 | ELSGLLPNTEYTV   |
| Q05707 | 525 | GEEASDPVTGQET   |
| Q05707 | 537 | TTLALSPPRNLRI   |
| Q05707 | 538 | TLALSPPRNLRI S  |
| Q05707 | 557 | ARLTWDPTSRQIN   |
| Q05707 | 584 | NEVEVDPIITTFPL  |
| Q05707 | 589 | DPITTFPLKGLTP   |
| Q05707 | 595 | PLKGLTPLTEYTI   |
| Q05707 | 614 | DEGQSEPLTGVFT   |
| Q05707 | 625 | FTTEEVP AQQYLE  |
| Q05707 | 646 | FRVTWHPLSADEG   |
| Q05707 | 660 | HKLMWI PVYGGKT  |
| Q05707 | 685 | VIEGLEPGTEYEV   |
| Q05707 | 720 | DSFWTEPATTIVP   |
| Q05707 | 726 | PATTIVPTTSVTS   |
| Q05707 | 776 | MTAQGDPEEEVIG   |
| Q05707 | 787 | IGTVMVPGSQNNL   |
| Q05707 | 797 | NNLLLKPLLPDTE   |
| Q05707 | 800 | LLKPLL PDTEYKV  |
| Q05707 | 810 | YKVTVTPIYTDGE   |
| Q05707 | 823 | GVSVSAPGKTLPS   |
| Q05707 | 828 | APGKTL PSSGPQN  |
| Q05707 | 832 | TLPSSGPQNLRVS   |
| Q05707 | 851 | LRITWDPPSSPVK   |
| Q05707 | 852 | RITWDPSSSPVKG   |

---

---

|        |      |                |
|--------|------|----------------|
| Q05707 | 855  | WDPSSPVKGYRI   |
| Q05707 | 865  | YRIVYKPVSVPGP  |
| Q05707 | 869  | YKPVSVPGPTLET  |
| Q05707 | 871  | PVSVPGPTLETFFV |
| Q05707 | 979  | CFYGLQPDSEYKI  |
| Q05707 | 997  | LQEIEGPSVSIME  |
| Q05707 | 1009 | EKTQSLPTRPPTF  |
| Q05707 | 1012 | QSLPTRPPTFPPT  |
| Q05707 | 1013 | SLPTRPPTFPPTI  |
| Q05707 | 1016 | TRPPTFPPTIPPA  |
| Q05707 | 1017 | RPPTFPPTIPPAK  |
| Q05707 | 1020 | TFPPTIPPAKEVC  |
| Q05707 | 1021 | FPPTIPPAKEVCK  |
| Q05707 | 1081 | VQFTDDPRTEFKL  |
| Q05707 | 1135 | GTRRGI PKVIVVI |
| Q05707 | 1184 | VSIGSKPSARHVF  |
| Q05707 | 1218 | TASATCPVVHKDG  |
| Q05707 | 1253 | EGVSMEPGTFNVF  |
| Q05707 | 1260 | GTFNVFPCYQLHK  |
| Q05707 | 1273 | DALVSQPTRYLHP  |
| Q05707 | 1279 | PTRYLHPEGLPSD  |
| Q05707 | 1283 | LHPEGLPSDYTIS  |
| Q05707 | 1296 | FLFRILPDTPQEP  |
| Q05707 | 1299 | RILPDTQEPFAL   |
| Q05707 | 1302 | PDTPQEPFALWEI  |
| Q05707 | 1315 | LNKNSDPLVGVIL  |
| Q05707 | 1347 | TVTFEGPEIRKIF  |
| Q05707 | 1406 | MVRSRGP GNSAP  |
| Q05707 | 1412 | PGNSAPFQLQMF   |
| Q05707 | 1436 | DKCCELPGLRDDE  |
| Q05707 | 1445 | RDDESCPDLPHSC  |
| Q05707 | 1448 | ESCPDLPHSCSCS  |
| Q05707 | 1463 | NEVALGPAGPPGG  |
| Q05707 | 1466 | ALGPAGPPGGPGL  |
| Q05707 | 1475 | GPGLRGPKGQQGE  |
| Q05707 | 1484 | QQGEPGPKGPDGP  |
| Q05707 | 1487 | EPGPKGPDGPRGE  |
| Q05707 | 1499 | EIGLPGPQGPPGP  |
| Q05707 | 1508 | PPGPQGPSGLSIQ  |
| Q05707 | 1534 | DTGLPGPQGIPGG  |
| Q05707 | 1564 | KDGSSGPPGPPGP  |
| Q05707 | 1567 | SSGPPGPPGPIGI  |
| Q05707 | 1570 | PPGPPGPIGIPGT  |
| Q05707 | 1588 | ITGSMGPQALGP   |
| Q05707 | 1594 | PQALGP PGVPGA  |
| Q05707 | 1655 | IRTVQGPGEPR    |
| Q05707 | 1673 | APGEQGP GTPGF  |
| Q05707 | 1711 | GVGTQGPRGPPGP  |
| Q05707 | 1714 | TQGPRGPPGAGP   |
| Q05707 | 1720 | PPGPAGPSGESRP  |
| Q05707 | 1737 | PPGSPGPRGPPGH  |
| Q05707 | 1740 | SPGPRGPPGHLGV  |
| Q05707 | 1749 | HLGVPGPQGPGSQ  |
| Q05707 | 1752 | VPGPQGPGQPGY   |
| Q05707 | 1761 | QPGYCDPSSCSAY  |
| Q05707 | 1772 | AYGVRAPHDPQPE  |
| Q05707 | 1774 | GVRAPHDPQPEFT  |
| Q05707 | 1777 | APHPDQPEFTPVQ  |
| Q05707 | 1781 | DQPEFTPVQDELE  |

---

---

|        |     |                |
|--------|-----|----------------|
| B2KPN7 | 17  | IFLVLFPMATLQL  |
| B2KPN7 | 62  | WEYHAHPKPNSEFW |
| Q6PSU2 | 44  | ERANLRPCEQHLM  |
| Q6PSU2 | 64  | DSYGRDPYSPSQD  |
| Q6PSU2 | 71  | YSPSQDPYSPSQD  |
| Q6PSU2 | 78  | YSPSQDPDRDPY   |
| Q6PSU2 | 83  | DPDRDPYSPSPY   |
| Q6PSU2 | 88  | DPYSPSPYDRGA   |
| Q6PSU2 | 149 | RELRLNPQQCLR   |
| Q6PSU2 | 157 | QCGLRAPQRCDLE  |
| P58786 | 28  | QGDGDQPADRNAV  |
| P58786 | 35  | ADRNAVPRDDNPG  |
| P58786 | 40  | VPRDDNPGGASGK  |
| P58787 | 40  | VPRDDNPSGTDGK  |
| P86256 | 2   | @@@@@DPCCGYRM  |
| P58808 | 5   | @@MRCLPVLIILL  |
| P58808 | 18  | LLTASAPGVVVL   |
| P58808 | 24  | PGVVVLKTEDDV   |
| P58808 | 31  | KTEDDVPMSSVYG  |
| P81755 | 18  | LLIASAPCFDART  |
| P81755 | 31  | KTDDDVPLSSLRD  |
| P69765 | 10  | LLITSTPSVDARL  |
| P69765 | 23  | KAKDNMPLASFHD  |
| P69765 | 46  | INTRCCPGKPCR   |
| B2CS62 | 27  | KLIRTRPLMYHVC  |
| D2Y171 | 69  | APCCQHPIETCCR  |
| D2Y168 | 23  | IETEAGPVNEAGV  |
| D2Y168 | 42  | LVGRGCPADCPNT  |
| D2Y168 | 46  | GCPADCNTCDSS   |
| P80762 | 5   | @@NMYLPPVPPP   |
| P80774 | 4   | @@@QNQPPDFANP  |
| P80774 | 5   | @@QNQPPDFANPF  |
| P80774 | 14  | ANPFIIPQNAAA@  |
| P86500 | 5   | @@FELLPSQDRSC  |
| P86500 | 52  | YYFGCCPGYATCM  |
| C4PWC4 | 70  | LNRVCGPMCCPAS  |
| C4PWC4 | 74  | CGPMCCPASHCYC  |
| P0CE29 | 40  | NGLARYPQRGGRD  |
| P0CE30 | 71  | LTRMCGPMCCARS  |
| B4YSU8 | 16  | ALLLLLPLSTAQD  |
| B4YSU8 | 69  | VNSRCCPTTDGC@  |
| P00057 | 7   | ASFBZAPGBVKA   |
| P00057 | 8   | SFBZAPGBVKAG   |
| P00057 | 38  | AGHKQGNLNLGF   |
| P00057 | 84  | NPKKYIPGTMVF   |
| P00057 | 91  | GTMVFPGLKKPQ   |
| P00057 | 96  | FPGLKKPQDRADL  |
| P15502 | 9   | GLTAAAPRPGVLL  |
| P15502 | 11  | TAAAPRPGVLLLL  |
| P15502 | 23  | LLSILHPSRPGGV  |
| P15502 | 26  | ILHPSRPGGVPGA  |
| P15502 | 30  | SRPGGVPGAIPGG  |
| P15502 | 34  | GVPGAIPGGVPGG  |
| P15502 | 38  | AIPGGVPGGVFYP  |
| P15502 | 44  | PGGVFYPGAGLGA  |
| P15502 | 58  | GGGALGPGGKPLK  |
| P15502 | 62  | LGPGGKPLKPVPG  |
| P15502 | 65  | GGKPLKVPGGGLA  |
| P15502 | 67  | KPLKVPGGLAGA   |

---

---

|        |     |               |
|--------|-----|---------------|
| P15502 | 83  | AGLGAFPAVTFPG |
| P15502 | 88  | FPAVTFPGALVPG |
| P15502 | 93  | FPGALVPGGVADA |
| P15502 | 130 | SAGAVVPQPGAGV |
| P15502 | 132 | GAVVPQPGAGVKP |
| P15502 | 138 | PGAGVKPGKVPGV |
| P15502 | 142 | VKPGKVPGVGLPG |
| P15502 | 147 | VPGVGLPGVYPGG |
| P15502 | 151 | GLPGVYPGGVLP  |
| P15502 | 156 | YPGGVLPGARFPG |
| P15502 | 161 | LPGARFPGVGVL  |
| P15502 | 167 | PGVGVLPGVPTGA |
| P15502 | 170 | GVLPGVPTGAGVK |
| P15502 | 177 | TGAGVKPKAPGVG |
| P15502 | 180 | GVKPKAPGVGGAF |
| P15502 | 194 | GIPGVGPFGGPQP |
| P15502 | 198 | VGPFGGPQPGVPL |
| P15502 | 200 | PFGGPQPGVPLGY |
| P15502 | 203 | GPQPGVPLGYPIK |
| P15502 | 207 | GVPLGYPIKAPKL |
| P15502 | 211 | GYPIKAPKLPGGY |
| P15502 | 214 | IKAPKLPGGYGLP |
| P15502 | 220 | PGGYGLPYTTGKL |
| P15502 | 227 | YTTGKLPGYGP   |
| P15502 | 232 | LPYGYGPGGVAGA |
| P15502 | 245 | AGKAGYPTGTGVG |
| P15502 | 252 | TGTGVGPQAAAAA |
| P15502 | 275 | GAAGVLPGVGGAG |
| P15502 | 290 | GVPGAIPGIGGIA |
| P15502 | 301 | IAGVGTAAAAAA  |
| P15502 | 324 | AAAGLVPGGPGFG |
| P15502 | 331 | GGPGFGPGVVGVP |
| P15502 | 337 | PGVVGVPAGVPG  |
| P15502 | 352 | VPGAGIPVVPAG  |
| P15502 | 355 | AGIPVVPAGIPG  |
| P15502 | 365 | IPGAAPGVVSPE  |
| P15502 | 370 | VPGVVSPEAAKA  |
| P15502 | 387 | AKYGARPGVGVGG |
| P15502 | 395 | VGVGGIPTYGVGA |
| P15502 | 405 | VGAGGFPFGVGV  |
| P15502 | 421 | PGVAGVPGVGGVP |
| P15502 | 433 | PGVGGVPGVGISP |
| P15502 | 439 | PGVGISPQAQAAA |
| P15502 | 465 | VLGGLVPGPQAAV |
| P15502 | 467 | GGLVPGPQAAVPG |
| P15502 | 472 | GPQAAVPGVPGTG |
| P15502 | 475 | AAVPGVPGTGGVP |
| P15502 | 486 | VPGVGTAAAAAAK |
| P15502 | 504 | AQFGLVPGVGVAP |
| P15502 | 510 | PGVGVAPGVGVAP |
| P15502 | 546 | PGVGVAPGIGPGG |
| P15502 | 550 | VAPGIGPGGVAAA |
| P15502 | 589 | GVGVGVPLGVGA  |
| P15502 | 623 | VRRSLSPELREGD |
| P15502 | 630 | ELREGDPSSSQHL |
| P15502 | 637 | SSSQHLPSTPSSP |
| P15502 | 640 | QHLPSTPSSPRVP |
| P15502 | 643 | PSTPSSPRVPGAL |
| P15502 | 646 | PSSPRVPGALAAA |

---

---

|        |     |                |
|--------|-----|----------------|
| P15502 | 662 | KYGAAVPGVLGGL  |
| P15502 | 685 | GVVGAGPAAAAAA  |
| P15502 | 720 | VGGLGVPGVGGLG  |
| P15502 | 729 | GGLGGIPAAAAAK  |
| P15502 | 730 | GLGGIPAAAAAKA  |
| P15502 | 755 | GGAGQFPLGGVAA  |
| P15502 | 763 | GGVAARPGFGLSP  |
| P15502 | 769 | PGFGLSPIFPGGA  |
| P15502 | 772 | GLSPIFPGGACLG  |
| A1X158 | 24  | ASAVYHPPSWTAW  |
| A1X158 | 25  | SAVYHPPSWTAWI  |
| A1X158 | 33  | WTAWIAPKPWTAW  |
| A1X158 | 35  | AWIAPKPWTAWKV  |
| A1X158 | 43  | TAWKVHPPAWTAW  |
| A1X158 | 44  | AWKVHPPAWTAWK  |
| A1X158 | 63  | TAWKATPKPWTAW  |
| A1X158 | 92  | WTAWKAPPPPTWTA |
| A1X158 | 93  | TAWKAPPPPTWTAW |
| A1X158 | 94  | AWKAPPPPTWTAWK |
| A1X158 | 175 | WKATPKPWTVWKA  |
| A1X158 | 443 | TAWRATPPPTWTA  |
| A1X158 | 444 | AWRATPPPTWTAW  |
| A1X158 | 445 | WRATPPPTWTAWH  |
| A1X158 | 461 | YGGYGKPGKPGKP  |
| A1X158 | 464 | YGKPGKPGKPGSK  |
| A1X158 | 467 | PGKPGKPGSKGPR  |
| A1X158 | 472 | KPGSKGPRGPAGP  |
| A1X158 | 475 | SKGPRGPAGPPGA  |
| A1X158 | 478 | PRGPAGPPGATGK  |
| A1X158 | 479 | RGPAGPPGATGKT  |
| A1X158 | 496 | ATGKRGP PGYPGK |
| A1X158 | 497 | TGKRGP PGYPGKP |
| A1X158 | 503 | PGYPGKPGVPGRN  |
| A1X158 | 506 | PGKPGVPGRNGYV  |
| A1X158 | 557 | WTAWTAPPAYG@@  |
| Q16665 | 45  | ELAHQLPLPHNVS  |
| Q16665 | 47  | AHQLPLPHNVSSH  |
| Q16665 | 138 | VFDFTHPCDHEEM  |
| Q16665 | 208 | DTNSNQPCGYKK   |
| Q16665 | 215 | QCGYKKPMTCLV   |
| Q16665 | 216 | CGYKKPMTCLVL   |
| Q16665 | 226 | LVLICEPIPHPSN  |
| Q16665 | 228 | LICEPIPHPSNIE  |
| Q16665 | 230 | CEPIPHPSNIEIP  |
| Q16665 | 236 | PSNIEIPLDSKTF  |
| Q16665 | 267 | ELMGYEPEELLGR  |
| Q16665 | 332 | NTKNSQPCIVCV   |
| Q16665 | 363 | TECVLKPVESDM   |
| Q16665 | 394 | DKLKKEPDALTLL  |
| Q16665 | 429 | QQLEEVPLYNDVM  |
| Q16665 | 437 | YNDVMLPSPNEKL  |
| Q16665 | 439 | DVMLPSPNEKLQN  |
| Q16665 | 452 | INLAMSPLPTAET  |
| Q16665 | 454 | LAMSPLPTAETPK  |
| Q16665 | 459 | LPTAETPKPLRSS  |
| Q16665 | 461 | TAETPKPLRSSAD  |
| Q16665 | 468 | LRSSADPALNQEV  |
| Q16665 | 480 | VALKLEPNPESLE  |
| Q16665 | 482 | LKLEPNPESLELS  |

---

---

|        |     |               |
|--------|-----|---------------|
| Q16665 | 492 | ELSFTMPQIQDQT |
| Q16665 | 499 | QIQDQTPSPSDGS |
| Q16665 | 501 | QDQTPSPSDGSTR |
| Q16665 | 511 | STRQSSPEPNSPS |
| Q16665 | 513 | RQSSPEPNSPSEY |
| Q16665 | 516 | SPEPNSPSEYCFY |
| Q16665 | 549 | DTEAKNPFSTQDT |
| Q16665 | 567 | MLAPYIPMDDDFQ |
| Q16665 | 582 | SFDQLSPLESSSA |
| Q16665 | 590 | ESSSASPESASPQ |
| Q16665 | 595 | SPESASPQSTVTV |
| Q16665 | 610 | QTQIQEPTANATT |
| Q16665 | 642 | KILIASPSPTHIH |
| Q16665 | 644 | LIASPSPTHIHKE |
| Q16665 | 658 | TSATSSPYRDTQS |
| Q16665 | 669 | QSRTASPNRAGKG |
| Q16665 | 685 | QTEKSHPRSPNVL |
| Q16665 | 688 | KSHPRSPNVLVA  |
| Q16665 | 702 | SQRTTVPEEELNP |
| Q16665 | 708 | PEEELNPKILALQ |
| Q16665 | 741 | GTLLQQPDDHAAT |
| Q16665 | 775 | KTIILIPSDLACR |
| Q16665 | 793 | MDESGLPQLTSYD |
| Q16665 | 805 | DCEVNAPIQGSRN |
| Q9Y2N7 | 42  | QLAHTLPFARGVS |
| Q9Y2N7 | 84  | VGAGGEPLDACYL |
| Q9Y2N7 | 135 | IFDFIHPCDQEEL |
| Q9Y2N7 | 147 | LQDALTQQQTLNR |
| Q9Y2N7 | 159 | RRKVEAPTERCFS |
| Q9Y2N7 | 200 | HMRAYKPPAQTS  |
| Q9Y2N7 | 201 | MRAYKPPAQTS   |
| Q9Y2N7 | 206 | PPAQTS        |
| Q9Y2N7 | 210 | PAGSPDS       |
| Q9Y2N7 | 214 | TSPAGSPDSEPL  |
| Q9Y2N7 | 215 | GSPDSEPLQCLV  |
| Q9Y2N7 | 215 | SPDSEPLQCLVL  |
| Q9Y2N7 | 227 | LICEAIPHPGSLE |
| Q9Y2N7 | 229 | CEAIPHPGSLEPP |
| Q9Y2N7 | 234 | HPGSLEPLGRGA  |
| Q9Y2N7 | 235 | PGSLEPLGRGAF  |
| Q9Y2N7 | 266 | EVAGYSPDDLIGC |
| Q9Y2N7 | 329 | VSGGRGPQSEIV  |
| Q9Y2N7 | 363 | EQHSRRPIQRGAP |
| Q9Y2N7 | 369 | PIQRGAPSQKDT  |
| Q9Y2N7 | 375 | PSQKDTNP      |
| Q9Y2N7 | 377 | PGDSLDT       |
| Q9Y2N7 | 384 | GDSLDT        |
| Q9Y2N7 | 386 | PGPRILA       |
| Q9Y2N7 | 394 | SLDTPGPRILAFL |
| Q9Y2N7 | 395 | ILAFLHPPSLSEA |
| Q9Y2N7 | 395 | LAFLHPPSLSEAA |
| Q9Y2N7 | 406 | AALAADPRRFCSP |
| Q9Y2N7 | 412 | PRRFCSPDLRRL  |
| Q9Y2N7 | 420 | LRRLLGPILDGAS |
| Q9Y2N7 | 431 | ASVAATPSTPLAT |
| Q9Y2N7 | 434 | AATPSTPLATRHP |
| Q9Y2N7 | 440 | PLATRHPQSPLSA |
| Q9Y2N7 | 443 | TRHPQSPLSADLP |
| Q9Y2N7 | 449 | PLSADLPDELPGV |
| Q9Y2N7 | 453 | DLPDELPGVTENV |
| Q9Y2N7 | 509 | NASEQLPRAYHRP |

---



---

|        |     |                |
|--------|-----|----------------|
| Q9Y2N7 | 515 | PRAYHRPLGAVPR  |
| Q9Y2N7 | 520 | RPLGAVPRPRARS  |
| Q9Y2N7 | 522 | LGAVPRPRARSFH  |
| Q9Y2N7 | 532 | SFHGLSPPALEPS  |
| Q9Y2N7 | 533 | FHGLSPPALEPSL  |
| Q9Y2N7 | 537 | SPPALEPSLLPRW  |
| Q9Y2N7 | 541 | LEPSLLPRWGSDP  |
| Q9Y2N7 | 547 | PRWGSDPRLSCSS  |
| Q9Y2N7 | 554 | RLSCSSPSRGDPS  |
| Q9Y2N7 | 559 | SPSRGDPASASSPM |
| Q9Y2N7 | 564 | DPSASSPMAGARK  |
| Q9Y2N7 | 591 | ELLGVRPPKRSPS  |
| Q9Y2N7 | 592 | LLGVRPPKRSPSP  |
| Q9Y2N7 | 596 | RPPKRSPSPEHEN  |
| Q9Y2N7 | 598 | PKRSPSPPEHENFL |
| Q9Y2N7 | 607 | ENFLLFPLSLSFL  |
| Q9Y2N7 | 618 | FLLTGGPAPGSLQ  |
| Q9Y2N7 | 620 | LTGGPAPGSLQDP  |
| Q9Y2N7 | 626 | PGSLQDPSTPLLN  |
| Q9Y2N7 | 629 | LQDPSTPLNLNE   |
| Q9Y2N7 | 636 | LLNLNEPLGLGPS  |
| Q9Y2N7 | 641 | EPLGLGPSLLSPY  |
| Q9Y2N7 | 646 | GPSLLSPYSDEDT  |
| Q9Y2N7 | 655 | DEDTTQPGGPFQP  |
| Q9Y2N7 | 658 | TTQPGGPFQPRAG  |
| Q9Y2N7 | 661 | PGGPFQPRAGSAQ  |
| Q7XAD0 | 78  | RHDSVLPPPSPKT  |
| Q7XAD0 | 86  | PSPKTDPIIGQLT  |
| Q7XAD0 | 98  | TTITTTPHHDDTV  |
| Q7XAD0 | 107 | DDTVAAPVGGRRH  |
| Q7XAD0 | 108 | DTVAAPVGGRRHD  |
| Q7XAD0 | 124 | SPPPPKPQDEQRQ  |
| Q7XAD0 | 141 | SSSSTLPLQASY@  |
| Q93WP8 | 13  | IYLILSPFGAEAR  |
| Q93WP8 | 41  | GRGANLPPPSPAS  |
| Q93WP8 | 60  | VSNSVSPTRTDEK  |
| Q93WP8 | 91  | NQLFSFPTSADNY  |
| Q93WP8 | 113 | FISYLLPVSYVWN  |
| Q93WP8 | 147 | RYWNRKPLSPSP   |
| Q93WP8 | 155 | SPPSPKPADGQRP  |
| Q93WP8 | 161 | PADGQRPLHSY@@  |
| Q93WP7 | 13  | IYLILSPFRAVSR  |
| Q93WP7 | 89  | NSNQLFPFLTSSD  |
| Q93WP7 | 149 | NRKPLSPSPKPA   |
| Q93WP7 | 150 | RKPLSPSPKPAD   |
| Q93WP7 | 152 | PLSPSPKPADGH   |
| P01042 | 84  | IKEGDCPVQSGKT  |
| P01042 | 130 | QTCQITPAEGPVV  |
| P01042 | 134 | ITPAEGPVVTAQY  |
| P01042 | 148 | CLGCVHPISTQSP  |
| P01042 | 154 | PISTQSPDLEPIL  |
| P01042 | 158 | QSPDLEPILRHGI  |
| P01042 | 216 | NFLFLTBDCKSLW  |
| P01042 | 252 | QNCDIYPGKDFVQ  |
| P01042 | 259 | GKDFVQPPTKICV  |
| P01042 | 260 | KDFVQPPTKICVG  |
| P01042 | 268 | KICVGCPRDIPTN  |
| P01042 | 272 | GCPRDIPTNSPEL  |
| P01042 | 276 | DIPTNSPELEETL  |

---

---

|        |     |                                 |
|--------|-----|---------------------------------|
| P01042 | 359 | AEVYVV <b>P</b> WEKKIY          |
| P01042 | 366 | WEKKIY <b>P</b> TVNCQP          |
| P01042 | 372 | PTVNCQ <b>P</b> LGMISL          |
| P01042 | 382 | ISLMKR <b>P</b> PGFSPF          |
| P01042 | 387 | RPPGFS <b>P</b> FRSSRI          |
| P01042 | 404 | EETTVS <b>P</b> PHTSMA          |
| P01042 | 405 | ETTVS <b>P</b> PHTSMAP          |
| P01042 | 411 | PHTSMA <b>P</b> AQDEER          |
| P01042 | 534 | SEDST <b>P</b> SAQTQE           |
| P01042 | 545 | QEKTEG <b>P</b> TPIPSL          |
| P01042 | 547 | KTEG <b>P</b> TPIPSLAK          |
| P01042 | 549 | EG <b>P</b> TPIPSLAKPG          |
| P01042 | 554 | IPSLAK <b>P</b> GVTVTF          |
| P01042 | 574 | LIATMM <b>P</b> PISPAP          |
| P01042 | 575 | IATMM <b>P</b> PISPAPI          |
| P01042 | 578 | MM <b>P</b> PISPAPIQSD          |
| P01042 | 580 | PPIS <b>P</b> APIQSDDD          |
| P01042 | 589 | SDDDWI <b>P</b> DIQIDP          |
| P01042 | 595 | PDIQID <b>P</b> NGLSFN          |
| P01042 | 602 | NGLSFN <b>P</b> ISDFPD          |
| P01042 | 607 | NPIS <b>P</b> DFD <b>T</b> TSPK |
| P01042 | 612 | FPD <b>T</b> TSPK <b>C</b> PGRP |
| P01042 | 615 | TTSP <b>K</b> CPGRPWKS          |
| P01042 | 618 | PKCPGR <b>P</b> WKSVSE          |
| P01042 | 627 | SVSEIN <b>P</b> TTQMKE          |
| Q800F1 | 53  | REAPER <b>P</b> PGFTPF          |
| P14618 | 4   | @@@MSK <b>P</b> HSEAGT          |
| P14618 | 38  | RLDIDS <b>P</b> PITARN          |
| P14618 | 39  | LDIDSP <b>P</b> ITARNT          |
| P14618 | 53  | IICTIG <b>P</b> ASRSVE          |
| P14618 | 102 | ESFASD <b>P</b> ILYRPV          |
| P14618 | 107 | DPILYR <b>P</b> VAVALD          |
| P14618 | 117 | ALDTKG <b>P</b> EIRTGL          |
| P14618 | 212 | KKGVNL <b>P</b> GAAVDL          |
| P14618 | 219 | GAAVDL <b>P</b> AVSEKD          |
| P14618 | 302 | DLGIEI <b>P</b> AEKVFL          |
| P14618 | 323 | CNRAGK <b>P</b> VICATQ          |
| P14618 | 338 | ESMIKK <b>P</b> RPTRA           |
| P14618 | 340 | MIKK <b>P</b> RPTRAEGS          |
| P14618 | 371 | TAKGDY <b>P</b> LEAVRM          |
| P14618 | 446 | QVARYR <b>P</b> RAPIIA          |
| P14618 | 449 | RYR <b>P</b> RAPIIAVTR          |
| P14618 | 457 | IAVTRN <b>P</b> QTARQA          |
| P14618 | 471 | LYRGIF <b>P</b> VLCCKDP         |
| P14618 | 477 | PVLCCKD <b>P</b> VQEAWA         |
| P14618 | 517 | VLTGWR <b>P</b> SGGFTN          |
| Q9BPB1 | 26  | LFQEKR <b>P</b> MKKIDF          |
| Q9BPB2 | 26  | VLQEKR <b>P</b> KEKIKF          |
| P02820 | 4   | @@@MRT <b>P</b> MLLALL          |
| P02820 | 25  | GRADAK <b>P</b> GDAESG          |
| P02820 | 62  | WLGAP <b>P</b> YPDPLE           |
| P02820 | 64  | GAP <b>P</b> YPDPLEPK           |
| P02820 | 66  | PAP <b>P</b> YPDPLEPKRE         |
| P02820 | 69  | YPDPLE <b>P</b> KREVCE          |
| P02820 | 78  | EVCELN <b>P</b> DCDELA          |
| P02821 | 4   | @@@YLA <b>P</b> GLGAPA          |
| P84349 | 25  | GQAGAK <b>P</b> SGAESS          |
| P84349 | 49  | SEVVKR <b>P</b> RRYLYQ          |
| P80760 | 5   | @@NYDK <b>P</b> PVEKPP          |

---

---

|        |     |                |
|--------|-----|----------------|
| P80760 | 10  | KPPVEKPPVYKPP  |
| P52285 | 40  | IGESDSPIPLPNV  |
| P52285 | 42  | ESDSPIPLPNVTS  |
| P52285 | 44  | DSPIPLPNVTSTI  |
| P52285 | 65  | RHHHQHPS PQGDD |
| P52285 | 67  | HHQHPS PQGDDKK |
| P52285 | 82  | KRLDDI PPYDRDF |
| P52285 | 83  | RLDDI PPYDRDFC |
| P52285 | 94  | FCKVDQPTLFELI  |
| P52285 | 110 | NYLDIKPLLDVTC  |
| P52285 | 128 | MIRGKTPEEIRKI  |
| Q0VKG8 | 55  | EERRDRPPSWIPK  |
| P84946 | 2   | @@@@@KPPWRL@@  |
| Q9M0S4 | 34  | PTRSPLPSPAQPP  |
| Q9M0S4 | 39  | LPSPAQPRTAAP   |
| Q9M0S4 | 40  | PSPAQPRTAAPT   |
| Q9M0S4 | 45  | PPRTAAPTPTSITP |
| Q9M0S4 | 47  | RTAAPTPTSITPTP |
| Q9M0S4 | 51  | PTPSITPTPTPTP  |
| Q9M0S4 | 53  | PSITPTPTPTPSA  |
| Q9M0S4 | 55  | ITPTPTPTPSATP  |
| Q9M0S4 | 57  | PTPTPTPSATPTA  |
| Q9M0S4 | 61  | PTPSATPTAAPVS  |
| Q9M0S4 | 65  | ATPTAAPVSPPAG  |
| Q9M0S4 | 68  | TAAPVSPAGSPL   |
| Q9M0S4 | 69  | AAPVSPAGSPLP   |
| Q9M0S4 | 73  | SPPAGSPLPSSAS  |
| Q9M0S4 | 75  | PAGSPLPSSASPP  |
| Q9M0S4 | 80  | LPSSASPPAPPTS  |
| Q9M0S4 | 81  | PSSASPPAPPTSL  |
| Q9M0S4 | 83  | SASPPAPPTSLTP  |
| Q9M0S4 | 84  | ASPPAPPTSLTPD  |
| Q9M0S4 | 89  | PPTSLT PDGAPVA |
| Q9M0S4 | 93  | LTPDGAPVAGPTG  |
| Q9M0S4 | 97  | GAPVAGPTGSTPV  |
| Q9M0S4 | 102 | GPTGSTPVDNNNA  |
| Q9LJD9 | 45  | DAAMFVPALFASV  |
| Q9STQ3 | 44  | DASLAI PAFFASV |
| Q9LVC0 | 45  | DASSFIPTFFASV  |
| O82337 | 63  | LTYLHPLDASSS   |
| Q9SJY7 | 33  | APTTVT PPPTALP |
| Q9SJY7 | 39  | PPPTALPPVTAET  |
| Q9SJY7 | 40  | PPTALPPVTAETP  |
| Q9SJY7 | 46  | PVTAETPSPIASP  |
| Q9SJY7 | 48  | TAETPSPIASPPV  |
| Q9SJY7 | 52  | PSPIASPPVPVNE  |
| Q9SJY7 | 53  | SPIASPPVPVNEP  |
| Q9SJY7 | 55  | IASPPVPVNEPTP  |
| Q9SJY7 | 59  | PVPVNEPTPAPTT  |
| Q9SJY7 | 61  | PVNEPTPAPTTSP  |
| Q9SJY7 | 63  | NEPTPAPTTSPTT  |
| Q9SJY7 | 67  | PAPTTSPTTSPVA  |
| Q9SJY7 | 71  | TSPTTSPVASPPQ  |
| Q9SJY7 | 75  | TSPVASPPQTDAP  |
| Q9SJY7 | 76  | SPVASPPQTDAPA  |
| Q9SJY7 | 81  | PPQTDAPAGPSA   |
| Q9SJY7 | 83  | QTDAPAGPSAGL   |
| Q9SJY7 | 85  | DAPAGPSAGLTP   |
| Q9SJY7 | 91  | PSAGLTPSSPAP   |

---

---

|        |     |                |
|--------|-----|----------------|
| Q9SJY7 | 95  | LTPTSSPAPGPDG  |
| Q9SJY7 | 97  | PTSSPAPGPDGAA  |
| Q9SJY7 | 99  | SSPAPGPDGAADA  |
| Q9SJY7 | 106 | DGAADAPSAAWAN  |
| Q9ZT16 | 43  | PPPVATPPPVATP  |
| Q9ZT16 | 44  | PPVATPPPVATPP  |
| Q9ZT16 | 45  | PVATPPPVATPPP  |
| Q9ZT16 | 55  | PPPAATPAPATPP  |
| Q9ZT16 | 57  | PAATPAPATPPPA  |
| Q9ZT16 | 60  | TPAPATPPPAATP  |
| Q9ZT16 | 61  | PAPATPPPAATPA  |
| Q9ZT16 | 62  | APATPPPAATPAP  |
| Q9ZT16 | 72  | PAPATTPPSVAPS  |
| Q9ZT16 | 73  | APATTTPSVAPSP  |
| Q9ZT16 | 77  | TPPSVAPSPADV   |
| Q9ZT16 | 79  | PSVAPSPADVPTA  |
| Q9ZT16 | 83  | PSPADVPTASPPA  |
| Q9ZT16 | 87  | DVPTASPPAPEGP  |
| Q9ZT16 | 88  | VPTASPPAPEGPT  |
| Q9ZT16 | 90  | TASPPAPEGPTVS  |
| Q9ZT16 | 93  | PPAPEGPTVSPSS  |
| Q9ZT16 | 97  | EGPTVSPSSAPGP  |
| Q9ZT16 | 101 | VSPSSAPGPSDAS  |
| Q9ZT16 | 103 | PSSAPGPSDASPA  |
| Q9ZT16 | 108 | GPSDASPAPSAAF  |
| Q9ZT16 | 110 | SDASAPSAAFSN   |
| Q8LG54 | 34  | PTTTVTPPPVATP  |
| Q8LG54 | 48  | PAATPAPTTPPPP  |
| Q8LG54 | 52  | PAPTTPPPAVSP   |
| Q8LG54 | 53  | APTTPPPAVSPA   |
| Q8LG54 | 54  | PTTTPPPAVSPAP  |
| Q8LG54 | 58  | PPPAVSAPTSSP   |
| Q8LG54 | 60  | PAVSPAAPTSSPPS |
| Q8LG54 | 64  | PAPTSSPPSSAPS  |
| Q8LG54 | 65  | APTSSPPSSAPSP  |
| Q8LG54 | 69  | SPPSSAPSPSSDA  |
| Q8LG54 | 71  | PSSAPSPPSDAPT  |
| Q8LG54 | 76  | SPSSDAPTASPPA  |
| Q8LG54 | 86  | PPAPEGPGVSPGE  |
| Q8LG54 | 90  | EGPGVSPGELAPT  |
| Q8LG54 | 95  | SPGELAPTPSDAS  |
| Q8LG54 | 97  | GELAPTPSDASAP  |
| Q8LG54 | 103 | PSDASAPPPNAAL  |
| Q8LG54 | 104 | SDASAPPPNAALT  |
| Q8LG54 | 105 | DASAPPPNAALTN  |
| Q9C5S0 | 23  | GVTGQAPTSPTTA  |
| Q9C5S0 | 34  | TATPAPTPTTPPP  |
| Q9C5S0 | 36  | TPAPTPTTPPPA   |
| Q9C5S0 | 39  | PPTPTTPPPAATP  |
| Q9C5S0 | 40  | PTPTTPPPAATPP  |
| Q9C5S0 | 41  | TPTTPPPAATPPP  |
| Q9C5S0 | 45  | PPPAATPPPVSA   |
| Q9C5S0 | 46  | PPAATPPPVSA    |
| Q9C5S0 | 47  | PAATPPPVSA     |
| Q9C5S0 | 51  | PPPVSA         |
| Q9C5S0 | 52  | PPPVSA         |
| Q9C5S0 | 53  | PVSAPPVTTSP    |
| Q9C5S0 | 58  | PPVTTSP        |
| Q9C5S0 | 59  | PVTTSP         |

---

---

|        |     |               |
|--------|-----|---------------|
| Q9C5S0 | 60  | VTTSPPVTTAPP  |
| Q9C5S0 | 65  | PPVTTAPPANPP  |
| Q9C5S0 | 66  | PVTTAPPANPPP  |
| Q9C5S0 | 67  | VTTAPPANPPPP  |
| Q9C5S0 | 70  | APPPANPPPVSS  |
| Q9C5S0 | 71  | PPPANPPPVSSP  |
| Q9C5S0 | 72  | PPANPPPVSSPP  |
| Q9C5S0 | 73  | PANPPPVSSPPP  |
| Q9C5S0 | 77  | PPPVSSPPASPP  |
| Q9C5S0 | 78  | PPVSSPPASPPP  |
| Q9C5S0 | 79  | PVSSPPASPPPA  |
| Q9C5S0 | 82  | SPPPASPPATPP  |
| Q9C5S0 | 83  | PPPASPPATPPP  |
| Q9C5S0 | 84  | PPASPPATPPPV  |
| Q9C5S0 | 87  | SPPPATPPPVASP |
| Q9C5S0 | 93  | PPPVASPPPVAS  |
| Q9C5S0 | 94  | PPVASPPPVASP  |
| Q9C5S0 | 95  | PVASPPPVASPP  |
| Q9C5S0 | 96  | VASPPPVASPPP  |
| Q9C5S0 | 111 | PPPVATPPAPLA  |
| Q9C5S0 | 112 | PPVATPPAPLAS  |
| Q9C5S0 | 113 | PVATPPAPLASP  |
| Q9C5S0 | 115 | ATPPAPLASPPA  |
| Q9C5S0 | 119 | PAPLASPPAQVPA |
| Q9C5S0 | 120 | APLASPPAQVPAP |
| Q9C5S0 | 124 | SPPAQVPAPAPTT |
| Q9C5S0 | 126 | PAQVPAPAPTTKP |
| Q9C5S0 | 128 | QVPAPAPTTKPD  |
| Q9C5S0 | 132 | PAPTTKPDSPSPS |
| Q9C5S0 | 135 | TTKPDSPSPSSP  |
| Q9C5S0 | 137 | KPDSPSPSPSSP  |
| Q9C5S0 | 139 | DSPSPSPSSPPL  |
| Q9C5S0 | 143 | PSPSSPPLPSSD  |
| Q9C5S0 | 144 | SPSSPPLPSSDA  |
| Q9C5S0 | 146 | SSSPPLPSSDAPG |
| Q9C5S0 | 151 | LPSSDAPGPSTD  |
| Q9C5S0 | 153 | SSDAPGPSTD    |
| Q9C5S0 | 160 | STD           |
| Q9C5S0 | 162 | DSISPAPSP     |
| Q9C5S0 | 164 | ISPAPSP       |
| P02745 | 4   | @@@MEGPRGWLVL |
| P02745 | 29  | EDLCRAPDGKKGE |
| P02745 | 75  | DQGEPPSGNPGK  |
| P02745 | 79  | PGPSGNPGKVGYP |
| P02745 | 87  | KVGYPGSGPLGA  |
| P02745 | 90  | YPGPSGPLGARGI |
| P02745 | 106 | KGTKGSPGNIKDQ |
| P02745 | 113 | GNIKDQPRPAFSA |
| P02745 | 115 | IKDQPRPAFSAIR |
| P02745 | 124 | SAIRRNPMGGNV  |
| P02745 | 125 | AIRRNPMGGNVV  |
| P02745 | 143 | ITNQEEPYQNHSG |
| P02745 | 156 | RFVCTVPGYYYFT |
| P02745 | 221 | VWVEKDPKKGHIY |
| P02747 | 5   | @@MDVGPSLPHL  |
| P02747 | 9   | VGPSSLPHLGLKL |
| P02747 | 23  | LLLLLLPLRGQAN |
| P02747 | 56  | YDGLPGKGEPI   |
| P02747 | 60  | PGPKGEPGIPAIP |

---

---

|        |     |                                  |
|--------|-----|----------------------------------|
| P02747 | 66  | PGIPAI <b>P</b> GIRGPK           |
| P02747 | 71  | IPGIRG <b>P</b> KGQKGE           |
| P02747 | 78  | KGQKGE <b>P</b> GLPGHP           |
| P02747 | 84  | PGLPGH <b>P</b> GKNGPM           |
| P02747 | 89  | HPGKNG <b>P</b> MGPPGM           |
| P02747 | 92  | KNGPMG <b>P</b> PGMPGV           |
| P02747 | 101 | MPGV <b>P</b> PGMPGPIGE          |
| P02747 | 108 | MGIPGE <b>P</b> GEEGRY           |
| P02747 | 131 | TRQTHQ <b>P</b> PAPNSL           |
| P02747 | 132 | RQTHQ <b>P</b> PAPNSLI           |
| P02747 | 134 | THQPPA <b>P</b> NSLIRF           |
| P02747 | 147 | NAVLTN <b>P</b> QGDYDT           |
| P02747 | 163 | KFTCKV <b>P</b> GLYYFV           |
| P58782 | 5   | @@GCCG <b>P</b> YPNAAC           |
| P58928 | 6   | @APWL <b>V</b> PSQITTC           |
| P0C8W0 | 9   | TLGILL <b>P</b> IALLLP           |
| P0C8W0 | 15  | PIALL <b>L</b> PLANPAE           |
| P0C8W0 | 19  | LLPLAN <b>P</b> AEANGDG          |
| P0C8W0 | 29  | GDGQAM <b>P</b> RTRNLR           |
| P0C8W0 | 73  | GPCCCK <b>P</b> NFTCQI           |
| Q7Z094 | 36  | STNWIL <b>P</b> GCSTSS           |
| Q9U3Z3 | 23  | FLNLV <b>V</b> PTSACRA           |
| Q9U3Z3 | 57  | GHPCR <b>H</b> PGKRSKL           |
| P60245 | 12  | LYGSCR <b>P</b> FPGCYN           |
| P02453 | 36  | GQEEDI <b>P</b> PVTCVQ           |
| P02453 | 37  | QEEDI <b>P</b> PVTCVQN           |
| P02453 | 82  | DELKDC <b>P</b> NAKVPT           |
| P02453 | 87  | CPNAKV <b>P</b> TDECCP           |
| P02453 | 93  | PTDECC <b>P</b> VCPEGQ           |
| P02453 | 96  | ECCPVC <b>P</b> EGQESP           |
| P02453 | 102 | PEGQES <b>P</b> TDQETT           |
| P02453 | 122 | DTGPRG <b>P</b> RGPA GP          |
| P02453 | 128 | PRGPAG <b>P</b> PGRDGI           |
| P02453 | 177 | STGISV <b>P</b> GPMGPS           |
| P02453 | 179 | GISVP <b>G</b> PMGPSGP           |
| P02453 | 189 | SGPRGL <b>P</b> GPPGAP           |
| P02453 | 192 | RGLPG <b>P</b> PGAPGPQ           |
| P02453 | 225 | RGPPG <b>P</b> PGKNGDD           |
| P02453 | 240 | AGKPGR <b>P</b> GERGPP           |
| P02453 | 255 | QGARGL <b>P</b> GTAGLP           |
| P02453 | 288 | AGPKGE <b>P</b> GSPGEN           |
| P02453 | 312 | PGERGR <b>P</b> GAPGPA           |
| P02453 | 342 | TGPAG <b>P</b> PGFPGAV           |
| P02453 | 345 | AGPPG <b>F</b> PGAVGAK           |
| P02453 | 359 | EGGPQ <b>G</b> PRGSEGP           |
| P02453 | 372 | QGV <b>R</b> GE <b>P</b> GPPGPA  |
| P02453 | 387 | AGPAGN <b>P</b> GADGQP           |
| P02453 | 408 | PGIAG <b>A</b> PGFPGAR           |
| P02453 | 411 | AGAPG <b>F</b> PGARGPS           |
| P02453 | 425 | PQG <b>P</b> SG <b>P</b> PGPKGN  |
| P02453 | 426 | QGP <b>S</b> GP <b>P</b> PGPKGNS |
| P02453 | 435 | KGNSG <b>E</b> PGAPGSK           |
| P02453 | 438 | SGEPG <b>A</b> PGSKGDT           |
| P02453 | 450 | TGAKG <b>E</b> PGPTGIQ           |
| P02453 | 459 | TGIQ <b>G</b> PPGPAGEE           |
| P02453 | 480 | PGPAGL <b>P</b> GPPGER           |
| P02453 | 483 | AGLPG <b>P</b> PGERGGP           |
| P02453 | 506 | VAGPK <b>G</b> PAGERGA           |
| P02453 | 513 | AGERG <b>A</b> PGPAGPK           |

---

---

|        |      |                |
|--------|------|----------------|
| P02453 | 515  | ERGAPGPAGPKGS  |
| P02453 | 522  | AGPKGSPGEAGRP  |
| P02453 | 528  | PGEAGRPEAGLP   |
| P02453 | 543  | KGLTGS PGSPGPD |
| P02453 | 546  | TGSPGS PGPDGKT |
| P02453 | 555  | DGKTGPPGPAGQD  |
| P02453 | 564  | AGQDGRPGPPGPP  |
| P02453 | 600  | AGERGVPGPPGAV  |
| P02453 | 603  | RGVPGPPGAVGPA  |
| P02453 | 608  | PPGAVGPAGKDGE  |
| P02453 | 621  | AGAQQPPGPAGPA  |
| P02453 | 623  | AQGPPGPAGPAGE  |
| P02453 | 651  | PGPAGPPGEAGKP  |
| P02453 | 663  | PGEQGVPGDLGAP  |
| P02453 | 669  | PGDLGAPGPSGAR  |
| P02453 | 671  | DLGAPGPSGARGE  |
| P02453 | 689  | ERGVQGP PGPAGP |
| P02453 | 690  | RGVQGP PGPAGPR |
| P02453 | 702  | RGANGAPGNDGAK  |
| P02453 | 714  | KGDAGAPGAPGSQ  |
| P02453 | 717  | AGAPGAPGSQGAP  |
| P02453 | 756  | KGADGAPGKDGVV  |
| P02453 | 828  | PGAKGEPGDAGAK  |
| P02453 | 840  | KGDAGPPGPAGPA  |
| P02453 | 849  | AGPAGPPGPIGNV  |
| P02453 | 851  | PAGPPGPIGNVGA  |
| P02453 | 858  | IGNVGAPGPKGAR  |
| P02453 | 885  | AGRVGPPGPSGNA  |
| P02453 | 893  | PSGNAGPPGPPGP  |
| P02453 | 894  | SGNAGPPGPPGPA  |
| P02453 | 918  | TGPAGRPGEVGPP  |
| P02453 | 924  | PGEVGPPGPPGPA  |
| P02453 | 926  | EVGPPGP PGPAGE |
| P02453 | 927  | VGPPGP PGPAGEK |
| P02453 | 929  | PPGPPGPAGEKGA  |
| P02453 | 936  | AGEKGAPGADGPA  |
| P02453 | 945  | DGPAGAPGTPGPQ  |
| P02453 | 1002 | PGPMGPPGLAGPP  |
| P02453 | 1008 | PGLAGPPGESGRE  |
| P02453 | 1017 | SGREGAPGAEGSP  |
| P02453 | 1023 | PGAEGSPGRDGSP  |
| P02453 | 1029 | PGRDGS PGAKGDR |
| P02453 | 1047 | AGPPGAPGAPGAP  |
| P02453 | 1050 | PGAPGAPGAPGPV  |
| P02453 | 1079 | PAGPIGPVGARGP  |
| P02453 | 1119 | SGLQGP PGPPGSP |
| P02453 | 1122 | QGPPGP PGSPGEQ |
| P02453 | 1125 | PGPPGS PGEQGPS |
| P02453 | 1142 | PAGPRGP PGSAGS |
| P02453 | 1143 | AGPRGP PGSAGSP |
| P02453 | 1149 | PGSAGSPGKDGLN  |
| P02453 | 1301 | GETCVYPTQPSVA  |
| P02453 | 1304 | CVYPTQPSVAQKN  |
| P02453 | 1459 | FGFDVG PACFL@@ |
| P0C2W8 | 322  | PTGLPGPPGERGG  |
| P0C2W8 | 601  | SPGKDGRGLTGP   |
| P0C2W8 | 883  | ETGPSGP PGAPGA |
| P0C2W8 | 884  | TGPSGP PGAPGAP |
| P0C2W8 | 1028 | PGPPGP PGPPSGA |

---



---

|        |     |                |
|--------|-----|----------------|
| P85154 | 11  | KGVGLGPGPMGLM  |
| P85154 | 13  | VGLGPGPMGLMGP  |
| P85154 | 32  | TGPPGSPGFQGP   |
| P85154 | 163 | SDGSVGPVGPAGP  |
| P85154 | 166 | SVGPVGPAGPIGS  |
| P85154 | 184 | FPGAPGPKGEIGP  |
| P85154 | 190 | PKGEIGPVGNPGP  |
| P85154 | 194 | IGPVGNPGPSGPA  |
| P85154 | 196 | PVGNPGPSGPAGP  |
| P85154 | 253 | PRGIPGPVGAAGA  |
| P85154 | 289 | EPGSAGPQGPPGP  |
| P85154 | 304 | EEGKRGPNGEAGS  |
| P85154 | 313 | EAGSAGPAGPPGL  |
| P85154 | 316 | SAGPAGPPGLRGG  |
| P85154 | 317 | AGPAGPPGLRGGP  |
| P85154 | 341 | AGVMGPPGSRGAS  |
| P85154 | 349 | SRGASGPAGVRGP  |
| P85154 | 355 | PAGVRGPPSGDGR  |
| P85154 | 362 | SGDSGRPGEPGVM  |
| P85154 | 365 | SGRPGEPGVMGPR  |
| P85154 | 370 | EPGVMGPRGLPGS  |
| P85154 | 374 | MGPRGLPGSPGNV  |
| P85154 | 377 | RGLPGSPGNVGPA  |
| P85154 | 382 | SPGNVGPPAGKEGP |
| P85154 | 388 | PAGKEGPAGLPGI  |
| P85154 | 392 | EGPAGLPIDGRP   |
| P85154 | 398 | PGIDGRPGPIGPA  |
| P85154 | 400 | IDGRPGPIGPAGA  |
| P85154 | 425 | KGPAGDPGKNGDK  |
| P85154 | 454 | NNGAQGPGLQGV   |
| P85154 | 455 | NGAQGPGLQGVQ   |
| P85154 | 481 | FQGLPGPSGTAGE  |
| P85154 | 514 | PRGERGPPGQSGA  |
| P85154 | 515 | RGERGPPGQSGAA  |
| P85154 | 523 | QSGAAGPTGPIGS  |
| P85154 | 545 | DGNKGEPGVVGAP  |
| P85154 | 551 | PGVVGAPGTAGPS  |
| P85154 | 556 | APGTAGPSGPVGL  |
| P85154 | 559 | TAGPSGPVGLPGE  |
| P85154 | 563 | SGPVGLPGERGAA  |
| P85154 | 607 | AVGAPGPAGATGD  |
| P85154 | 619 | DRGEAGPAGSAGP  |
| P85154 | 625 | PAGSAGPAGPRGS  |
| P85154 | 628 | SAGPAGPRGSPGE  |
| P85154 | 632 | AGPRGSPGERGEV  |
| P85154 | 640 | ERGEVGPAGPNGF  |
| P85154 | 643 | EVGPAGPNGFAGP  |
| P85154 | 649 | PNGFAGPAGAAGQ  |
| P85154 | 673 | PKGENGVPGPTGP  |
| P85154 | 676 | ENGPVGPTGPVGA  |
| P85154 | 679 | PVGPTGPVGAAGP  |
| P85154 | 688 | AAGPAGPNGPPGP  |
| P85154 | 692 | AGPNGPPGPAGSR  |
| P85154 | 694 | PNGPPGPAGSRGD  |
| P85154 | 703 | SRGDGGPPGATGF  |
| P85154 | 718 | AAGRTGPPGPAGI  |
| P85154 | 742 | KEGLRGPRGDQGP  |
| P85154 | 760 | ETGASGPPGFAGE  |
| P85154 | 773 | KGSSGEPGTAGPP  |

---

---

|        |     |                |
|--------|-----|----------------|
| P85154 | 778 | EPGTAGPPGAPGP  |
| P85154 | 790 | PQGILGPPGILGL  |
| P85154 | 817 | AVGEPGLGIAGP   |
| P85154 | 830 | PGARGPPGAVGSP  |
| P85154 | 836 | PGAVGSPGVNGAP  |
| P85154 | 872 | KGERGYPGNAGPV  |
| P85154 | 877 | YPGNAGPVGTAGA  |
| P85154 | 884 | VGTAGAPGPQGPL  |
| P85154 | 886 | TAGAPGPQGPLGP  |
| P85154 | 889 | APGPQGPLGPAGK  |
| P85154 | 892 | PQGPLGPAGKHGN  |
| P85154 | 904 | NRGEPGPAGSVGP  |
| P85154 | 910 | PAGSVGPVGAVGP  |
| P85154 | 916 | PVGAVGPRGPSGP  |
| P85154 | 919 | AVGPRGPSGPQGA  |
| P85154 | 922 | PRGPSGPQGARGD  |
| P85154 | 937 | EAGDKGPRGLPGF  |
| P85154 | 965 | HGDQSGPSVGPA   |
| P85154 | 973 | SVGPAGPRGPAGP  |
| P85154 | 989 | VGKDGRPGHAGAV  |
| P85154 | 997 | HAGAVGPAGVRGS  |
| P85153 | 8   | EPGGVGPIGPPGE  |
| P85153 | 327 | @@@@GAPGERGET  |
| P85153 | 413 | @@@@VGPPGANGN  |
| P85153 | 650 | LQGLPGPPGTSGD  |
| P85153 | 662 | DQGASGPSGPAGP  |
| P85153 | 665 | ASGPSGPAGPR@@  |
| P12111 | 8   | RKHRHLPLVAVFC  |
| P12111 | 21  | LFLSGFPTTHAQQ  |
| P12111 | 87  | VQFNNGNPHTEFL  |
| P12111 | 143 | RAGDGVQVIVVL   |
| P12111 | 161 | KDGLALPSAELKS  |
| P12111 | 192 | KEIASEPLNMHMF  |
| P12111 | 223 | VHSSVSPERAGDT  |
| P12111 | 273 | NLLEKLPIGTQQI  |
| P12111 | 290 | VQFSDEPRTMFSL  |
| P12111 | 347 | RVEEGVPQVLVLI  |
| P12111 | 357 | VLISAGPSSDEIR  |
| P12111 | 403 | NLVFTVPEFRSFG  |
| P12111 | 417 | LQEKLLPYIVGVA  |
| P12111 | 431 | RHIVLKPTIVTQ   |
| P12111 | 432 | HIVLKPTIVTQV   |
| P12111 | 495 | YADTVRPEFYFNT  |
| P12111 | 503 | FYFNTHPTKREVI  |
| P12111 | 517 | AVRKMKPLDGSAL  |
| P12111 | 550 | RAAEGI PKLLVLI |
| P12111 | 568 | LDEISQPAQELKR  |
| P12111 | 605 | SSLVFI PAEFRAA |
| P12111 | 612 | AEFRAAPLQGMLP  |
| P12111 | 618 | PLQGMLPGLLAPL  |
| P12111 | 623 | LPGLLAPLRTL    |
| P12111 | 631 | RTLSGTPEVHSNK  |
| P12111 | 656 | VGKTNFPYVRDFV  |
| P12111 | 687 | VQFSDTPVTEFSL  |
| P12111 | 744 | RIREHVPQLLLLL  |
| P12111 | 793 | EQIAFNPSLVYLM  |
| P12111 | 806 | DDFSSLPALPQQ   |
| P12111 | 809 | SSLPALPQQLIQP  |
| P12111 | 815 | PQQLIQPLTTYVS  |

---

---

|        |      |             |         |
|--------|------|-------------|---------|
| P12111 | 828  | GGVEEVPLAQ  | PES     |
| P12111 | 832  | EVPLAQ      | PESKRDI |
| P12111 | 853  | NLVGQFPVVR  | DFL     |
| P12111 | 870  | DELNVKPEG   | TRIA    |
| P12111 | 897  | DEHQSKPEIL  | NLV     |
| P12111 | 959  | SDRVDGPASN  | LKQ     |
| P12111 | 970  | KQSGVVPFIF  | QAK     |
| P12111 | 980  | QAKNADPAELE | QI      |
| P12111 | 990  | EQIVLSPAFIL | A       |
| P12111 | 1000 | LAAESLPKIGD | LH      |
| P12111 | 1007 | KIGDLHPQIV  | NLL     |
| P12111 | 1021 | SVHNGAPAPV  | SGE     |
| P12111 | 1023 | HNGAPAPVSGE | KD      |
| P12111 | 1045 | GVRSGFPLLE  | KEFV    |
| P12111 | 1078 | YSDRTRPEFY  | LNS     |
| P12111 | 1104 | LTLLGGPTPN  | TGA     |
| P12111 | 1106 | LLGGPTPN    | TGAAL   |
| P12111 | 1133 | RITEGVPQLLI | VL      |
| P12111 | 1151 | GDDVRNPSVV  | KR      |
| P12111 | 1162 | KRGGAVPIGIG | I       |
| P12111 | 1182 | QTISFIPDFAV | AI      |
| P12111 | 1189 | DFAVAIPTFR  | QLG     |
| P12111 | 1218 | EL SRLQPVL  | QPLP    |
| P12111 | 1222 | LQPVLQPLPS  | PGV     |
| P12111 | 1224 | PVLQPLPSPG  | VGG     |
| P12111 | 1226 | LQPLPSPGV   | GKR     |
| P12111 | 1246 | GSQSAGPEFQ  | YVR     |
| P12111 | 1280 | IQFSDDPKVE  | FLL     |
| P12111 | 1304 | AVQRLRPKG   | GRQI    |
| P12111 | 1327 | RNIFKRPLGS  | RIE     |
| P12111 | 1355 | DDEVDDPAVEL | KQ      |
| P12111 | 1366 | KQFGVAPFTI  | ARN     |
| P12111 | 1385 | VKISLSPEYV  | FSV     |
| P12111 | 1398 | STFRELPSLE  | QKL     |
| P12111 | 1407 | EQKLLTPI    | TTLTS   |
| P12111 | 1426 | LASTRYPPPA  | VES     |
| P12111 | 1427 | ASTRYPPPA   | VESD    |
| P12111 | 1428 | STRYPPPA    | VESDA   |
| P12111 | 1449 | SSEGVRPDGF  | FAHI    |
| P12111 | 1470 | RRLNIGPSK   | VRVG    |
| P12111 | 1486 | FSNDVFPEFY  | LKT     |
| P12111 | 1498 | TYRSQAPVL   | DAIR    |
| P12111 | 1513 | RLRGGSPLN   | TGKA    |
| P12111 | 1541 | RIEDGVPQH   | LVLV    |
| P12111 | 1590 | QTITNDPRL   | VFTV    |
| P12111 | 1603 | REFRELPNIE  | EERI    |
| P12111 | 1615 | IMNSFGPSA   | ATPA    |
| P12111 | 1620 | GPSAATPAP   | PGVD    |
| P12111 | 1622 | SAATPAPPG   | VDTP    |
| P12111 | 1623 | AATPAPPG    | VDTPP   |
| P12111 | 1628 | PPGVDTPP    | PSRPE   |
| P12111 | 1629 | PGVDTPP     | PSRPEK  |
| P12111 | 1630 | GVDTPP      | PSRPEKK |
| P12111 | 1633 | TPPPSRPE    | KKKAD   |
| P12111 | 1687 | VQYNSDPT    | DEFFL   |
| P12111 | 1733 | RVNHFVPE    | AGSRL   |
| P12111 | 1744 | RLDQRVQI    | AFVI    |
| P12111 | 1826 | MHETLCPG    | VTDA    |
| P12111 | 1883 | CSGGRSPT    | VRVSV   |

---

---

|        |      |                |
|--------|------|----------------|
| P12111 | 1894 | SVVANTPSGPVEA  |
| P12111 | 1897 | ANTPSGPVEAFDF  |
| P12111 | 1908 | DFDEYQPEMLEKF  |
| P12111 | 1922 | NMRSQHPLYLTED  |
| P12111 | 1942 | KFRQSSPDSVKVV  |
| P12111 | 2005 | GFMYDRPLRLNLL  |
| P12111 | 2033 | KACCGVPCKCSGQ  |
| P12111 | 2045 | QRGDRGPIGSIGP  |
| P12111 | 2051 | PIGSIGPKGIPGE  |
| P12111 | 2055 | IGPKGIPGEDGYR  |
| P12111 | 2064 | DGYRGYPGDEGGP  |
| P12111 | 2070 | PGDEGGPGERGPP  |
| P12111 | 2075 | GPGERGPPGVNGT  |
| P12111 | 2076 | PGERGPPGVNGTQ  |
| P12111 | 2088 | QGFQGC PGQRGVK |
| P12111 | 2124 | DGDKGLPGSSGEK  |
| P12111 | 2133 | SGEKGNPGRRGDK  |
| P12111 | 2141 | RRGDKGPRGEKGE  |
| P12111 | 2157 | VGIRGDPGNPGQD  |
| P12111 | 2160 | RGDPGNPGQDSQE  |
| P12111 | 2169 | DSQERGPKGETGD  |
| P12111 | 2178 | ETGDLGPMGVPR   |
| P12111 | 2182 | LGPMGVPGRDGVP  |
| P12111 | 2188 | PGRDGVPGGPGET  |
| P12111 | 2191 | DGVPGGPGETGKN  |
| P12111 | 2205 | GFGRRGPPGAKGN  |
| P12111 | 2215 | KGNKGGPGQPGFE  |
| P12111 | 2218 | KGGPGQPGFEGEQ  |
| P12111 | 2232 | TRGAQGPAGPAGP  |
| P12111 | 2235 | AQGPAGPAGPPGL  |
| P12111 | 2238 | PAGPAGPPGLIGE  |
| P12111 | 2250 | EQGISGPRGSGGA  |
| P12111 | 2260 | GGAAGAPGERGRT  |
| P12111 | 2268 | ERGRTGPLGRKGE  |
| P12111 | 2275 | LGRKGE PGEPGPK |
| P12111 | 2278 | KGEPGE PGPKGGI |
| P12111 | 2280 | EPGE PGPKGGIGN |
| P12111 | 2289 | GIGNRGPRGETGD  |
| P12111 | 2321 | FPGYPGPKGNPGE  |
| P12111 | 2325 | PGPKGNPGEPGLN  |
| P12111 | 2328 | KGNPGE PGLNGTT |
| P12111 | 2336 | LNGTTGPKGIRGR  |
| P12111 | 2348 | RRGNSGPPGIVGQ  |
| P12111 | 2349 | RGNSGPPGIVGQK  |
| P12111 | 2358 | VGQKGDPGYPGPA  |
| P12111 | 2361 | KGDPGYPGPAGPK  |
| P12111 | 2363 | DPGYPGPAGPKGN  |
| P12111 | 2366 | YPGPAGPKGNRGD  |
| P12111 | 2388 | SIKDKCPCCYGPL  |
| P12111 | 2393 | CPCCYGPLECPVF  |
| P12111 | 2397 | YGPLECPVFPTEL  |
| P12111 | 2400 | LECPVFPTELAF   |
| P12111 | 2440 | IAESNCPRGARVA  |
| P12111 | 2519 | VFFSNTPTRASPQ  |
| P12111 | 2524 | TPTRAS PQLREAV |
| P12111 | 2540 | SDAGITPLFLTRQ  |
| P12111 | 2569 | GHALVL PAGRDLT |
| P12111 | 2595 | DICNIDPSCGFGS  |
| P12111 | 2604 | GFGSWRPSFRDRR  |

---

---

|        |      |        |          |
|--------|------|--------|----------|
| P12111 | 2653 | RQLDMS | DPKASQ   |
| P12111 | 2655 | LDMSPD | PKASQHF  |
| P12111 | 2671 | AVVQHA | PSESVDN  |
| P12111 | 2681 | VDNASM | PPVKVEF  |
| P12111 | 2682 | DNASMP | PPVKVEFS |
| P12111 | 2731 | NVFESA | PNPRDLK  |
| P12111 | 2733 | FESAPN | PRDLKIV  |
| P12111 | 2748 | MLTGEV | PEQQLEE  |
| P12111 | 2790 | YTFASE | PNDVFFK  |
| P12111 | 2808 | TELNEE | PLMRFGR  |
| P12111 | 2817 | RFGRL  | LPFVSSE  |
| P12111 | 2830 | NAFYLS | PDIRKQC  |
| P12111 | 2844 | WFQGDQ | PTKNLVK  |
| P12111 | 2859 | HKQVNV | PNNVTSS  |
| P12111 | 2866 | NNVTSS | PTSNPVT  |
| P12111 | 2870 | SSPTSN | PVTTTKP  |
| P12111 | 2876 | PVTTTK | PVTTTKP  |
| P12111 | 2889 | VTTTTK | PVTTTTP  |
| P12111 | 2896 | VTTTTK | PVTIINQ  |
| P12111 | 2903 | VTIINQ | PSVKPAA  |
| P12111 | 2907 | NQPSVK | PAAAKPA  |
| P12111 | 2912 | KPAAAK | PAPAKPV  |
| P12111 | 2914 | AAAKPA | PAKPVAA  |
| P12111 | 2917 | KPAPAK | PVAAKPV  |
| P12111 | 2922 | KPVAAK | PVATKMA  |
| P12111 | 2932 | KMATVR | PPVAVKP  |
| P12111 | 2933 | MATVRP | PPVAVKPA |
| P12111 | 2938 | PPVAVK | PATAAKP  |
| P12111 | 2944 | PATAAK | PVAAKPA  |
| P12111 | 2949 | KPVAAK | PAAVRPP  |
| P12111 | 2954 | KPAAVR | PAAAAAA  |
| P12111 | 2955 | PAAVRP | PAAAAAK  |
| P12111 | 2962 | AAAAAK | PVATKPE  |
| P12111 | 2967 | KPVATK | PEVPRPQ  |
| P12111 | 2970 | ATKPEV | PRPQAAK  |
| P12111 | 2972 | KPEVPR | PQAAKPA  |
| P12111 | 2977 | RPQAAK | PAATKPA  |
| P12111 | 2982 | KPAATK | PATTKPM  |
| P12111 | 2987 | KPATTK | PMVKMSR  |
| P12111 | 3014 | HWERA  | EPGPYFY  |
| P12111 | 3015 | WERAEP | PGPYFYD  |
| P12111 | 3017 | RAEPPG | PYFYDLT  |
| P12111 | 3081 | STKKSQ | PPPPQPA  |
| P12111 | 3082 | TKKSQP | PPPPQPAR |
| P12111 | 3083 | KKSQPP | PPQPARS  |
| P12111 | 3084 | KSQPPP | PQPARS   |
| P12111 | 3086 | QPPPPQ | PARSASS  |
| P12111 | 3103 | LMVSTE | PLALTET  |
| P12111 | 3115 | TDICKL | PKDEGTC  |
| P12111 | 3132 | LKWYYD | PNTKSCA  |
| P12111 | 3164 | CEKVC  | APVLAKPG |
| P12111 | 3169 | APVLAK | PGVISVM  |
| P60513 | 13   | YGFCSL | PILKNGL  |
| P58914 | 3    | @@@@CK | PPGSPCR  |
| Q02388 | 19   | GILAE  | APRVRAQH |
| Q02388 | 67   | LEGLVL | PFSGAAS  |
| Q02388 | 88   | VQYSDD | PRTEFGL  |
| Q02388 | 133  | ADHVFL | PQLARPG  |
| Q02388 | 138  | LPQLAR | PGVPKVC  |

---

---

|        |     |                         |
|--------|-----|-------------------------|
| Q02388 | 141 | LARPGV <b>P</b> KVCILI  |
| Q02388 | 180 | GIKNAD <b>P</b> EELKRV  |
| Q02388 | 190 | KRVASQ <b>P</b> TSDDFF  |
| Q02388 | 209 | ILRTL <b>L</b> PLVSRRV  |
| Q02388 | 223 | TTAGGV <b>P</b> VTRPPD  |
| Q02388 | 227 | GVPVTR <b>P</b> PDDSTS  |
| Q02388 | 228 | VPVTR <b>P</b> PDDSTSA  |
| Q02388 | 235 | DDSTSA <b>P</b> RDVLVS  |
| Q02388 | 243 | DLVLSE <b>P</b> SSQSLR  |
| Q02388 | 258 | WTAASG <b>P</b> VTGYKV  |
| Q02388 | 268 | YKVQYT <b>P</b> LTGLGQ  |
| Q02388 | 275 | LTGLGQ <b>P</b> LPSEQR  |
| Q02388 | 277 | GLGQ <b>P</b> LPSEQRQEV |
| Q02388 | 286 | RQEVNV <b>P</b> AGETSV  |
| Q02388 | 299 | RLRGLR <b>P</b> LTEYQV  |
| Q02388 | 331 | TTALEG <b>P</b> ELTIQN  |
| Q02388 | 351 | VAWRSV <b>P</b> GATGYR  |
| Q02388 | 367 | RVLSGG <b>P</b> TQQQEL  |
| Q02388 | 375 | QQQELG <b>P</b> QGGSVL  |
| Q02388 | 387 | LLRDLE <b>P</b> GTDYEV  |
| Q02388 | 405 | FGRSVG <b>P</b> ATSLMA  |
| Q02388 | 423 | VEQTLR <b>P</b> VILGPT  |
| Q02388 | 428 | RPVILG <b>P</b> TSILLS  |
| Q02388 | 439 | LSWNLV <b>P</b> EARGYR  |
| Q02388 | 456 | RETGLE <b>P</b> PQKVVL  |
| Q02388 | 457 | ETGLE <b>P</b> PQKVVL   |
| Q02388 | 463 | PQKVVL <b>P</b> SDVTRY  |
| Q02388 | 476 | QLDGLQ <b>P</b> GTEYRL  |
| Q02388 | 496 | GHEVAT <b>P</b> ATVVPT  |
| Q02388 | 501 | TPATVV <b>P</b> TGPELP  |
| Q02388 | 504 | TVVPTG <b>P</b> ELPVSP  |
| Q02388 | 507 | PTGPEL <b>P</b> VSPVTD  |
| Q02388 | 510 | PELPVS <b>P</b> VTDLQA  |
| Q02388 | 520 | LQATEL <b>P</b> GQVRV   |
| Q02388 | 530 | VRVSW <b>P</b> VPGATQ   |
| Q02388 | 532 | VSWSPV <b>P</b> GATQYR  |
| Q02388 | 554 | ERTLV <b>L</b> PGSQTA   |
| Q02388 | 581 | VSARVG <b>P</b> REGSAS  |
| Q02388 | 595 | LTVRRE <b>P</b> ETPLAV  |
| Q02388 | 598 | RREPET <b>P</b> LAVPGL  |
| Q02388 | 602 | ETPLAV <b>P</b> GLRVVV  |
| Q02388 | 620 | VRVAWG <b>P</b> VPGASG  |
| Q02388 | 622 | VAWGPV <b>P</b> GASGFR  |
| Q02388 | 637 | WSTGSG <b>P</b> ESSQTL  |
| Q02388 | 644 | ESSQTL <b>P</b> PDSTAT  |
| Q02388 | 645 | SSQTL <b>P</b> PDSTATD  |
| Q02388 | 657 | DITGLQ <b>P</b> GTTYQV  |
| Q02388 | 675 | RGREEG <b>P</b> AAVIVA  |
| Q02388 | 685 | IVARTD <b>P</b> LGPVRT  |
| Q02388 | 688 | RTDPLG <b>P</b> VRTVHV  |
| Q02388 | 710 | ITWTRV <b>P</b> GATGYR  |
| Q02388 | 725 | WWSAHG <b>P</b> EKSQLV  |
| Q02388 | 745 | ELDGLE <b>P</b> DTEYTV  |
| Q02388 | 763 | VAGVDG <b>P</b> PASVVV  |
| Q02388 | 764 | AGVDGP <b>P</b> PASVVV  |
| Q02388 | 773 | VVVRTA <b>P</b> EPVGRV  |
| Q02388 | 775 | VRTAPE <b>P</b> VGRVSR  |
| Q02388 | 816 | GRSEGG <b>P</b> MRHQIL  |
| Q02388 | 823 | MRHQIL <b>P</b> GNNTDSA |

---

---

|        |      |        |           |
|--------|------|--------|-----------|
| Q02388 | 855  | GDREGT | PVSIVVT   |
| Q02388 | 863  | SIVVTT | PPEAPPA   |
| Q02388 | 864  | IVVTTT | PEAPPAL   |
| Q02388 | 867  | TTTPEA | PALGTL    |
| Q02388 | 868  | TPPEA  | PALGTLH   |
| Q02388 | 889  | LRLRWE | PVPRAQG   |
| Q02388 | 891  | LRWEPV | PRAQGFL   |
| Q02388 | 902  | FLLHWQ | PEGGQEQ   |
| Q02388 | 914  | QSRVLG | PELSSYH   |
| Q02388 | 926  | HLDGLE | PATQYRV   |
| Q02388 | 939  | RLSVLG | PAGEGPS   |
| Q02388 | 944  | GPAGEG | PSAEVTA   |
| Q02388 | 955  | TARTES | PRVPSIE   |
| Q02388 | 958  | TESPRV | PSIELRV   |
| Q02388 | 978  | VTLAWT | PVSRASS   |
| Q02388 | 991  | YILSWR | PLRGPQG   |
| Q02388 | 995  | WRPLRG | PGQEVPG   |
| Q02388 | 1000 | GPGQEV | PGSPQTL   |
| Q02388 | 1003 | QEVPGS | PQTLPGI   |
| Q02388 | 1007 | GSPQTL | PGISSSQ   |
| Q02388 | 1020 | RVTGLE | PGVSYIF   |
| Q02388 | 1030 | YIFSLT | PVLDGVR   |
| Q02388 | 1038 | LDGVRG | PEASVTQ   |
| Q02388 | 1046 | ASVTQT | PVCPRGL   |
| Q02388 | 1049 | TQTPVC | PRGLADV   |
| Q02388 | 1059 | ADVVF  | FLPHATQDN |
| Q02388 | 1085 | LVLALG | PLGPQAV   |
| Q02388 | 1088 | ALGPLG | PQAVQVG   |
| Q02388 | 1102 | LSYSHR | PSPLFPL   |
| Q02388 | 1104 | YSHRPS | PLFPLNG   |
| Q02388 | 1107 | RPSPLF | PLNGSHD   |
| Q02388 | 1125 | QRIRDM | PYMDPSG   |
| Q02388 | 1129 | DMPYMD | PSGNNLG   |
| Q02388 | 1148 | HRYMLA | PDAPGRR   |
| Q02388 | 1151 | MLAPDA | PGRRQHV   |
| Q02388 | 1158 | GRRQHV | PGVMVLL   |
| Q02388 | 1168 | VLLVDE | PLRGDIF   |
| Q02388 | 1176 | RGDIFS | PIREAQA   |
| Q02388 | 1197 | GMAGAD | PEQLRRL   |
| Q02388 | 1205 | QLRRLA | PGMDSVQ   |
| Q02388 | 1220 | FAVDDG | PSLDQAV   |
| Q02388 | 1242 | ASFTTQ | PRPEPCP   |
| Q02388 | 1244 | FTTQPR | PEPCPVY   |
| Q02388 | 1246 | TQPRPE | PCPVYCP   |
| Q02388 | 1248 | PRPEPC | PVYCPKG   |
| Q02388 | 1252 | PCPVYC | PKGQKGE   |
| Q02388 | 1259 | KGQKGE | PGEMGLR   |
| Q02388 | 1270 | LRGQVG | PPGDPGL   |
| Q02388 | 1271 | RGQVGP | PGDPGLP   |
| Q02388 | 1274 | VGPPGD | PGLPGRT   |
| Q02388 | 1277 | PGDPGL | PGRTGAP   |
| Q02388 | 1283 | PGRTGA | PGPQGPP   |
| Q02388 | 1285 | RTGAPG | PQGPPGS   |
| Q02388 | 1288 | APGPQG | PPGSATA   |
| Q02388 | 1289 | PGPQGP | PGSATAK   |
| Q02388 | 1301 | KGERGF | PGADGRP   |
| Q02388 | 1307 | PGADGR | PGSPGRA   |
| Q02388 | 1310 | DGRPGS | PGRAGNP   |
| Q02388 | 1316 | PGRAGN | PGTPGAP   |

---



---

|        |      |                                                  |
|--------|------|--------------------------------------------------|
| Q02388 | 1319 | AGNPGT <b>P</b> GAPGLK                           |
| Q02388 | 1322 | PGTPGAP <b>P</b> GLKGS                           |
| Q02388 | 1328 | PGLKGS <b>P</b> GLPGPR                           |
| Q02388 | 1331 | KGS <b>P</b> GL <b>P</b> GPRGDP                  |
| Q02388 | 1333 | SPGL <b>P</b> G <b>P</b> RGDPGE                  |
| Q02388 | 1337 | PGPRGD <b>P</b> GERGPR                           |
| Q02388 | 1342 | DPGERG <b>P</b> RGPKGE                           |
| Q02388 | 1345 | ERGPRG <b>P</b> KGEPGA                           |
| Q02388 | 1349 | RGPKGE <b>P</b> GAPGQV                           |
| Q02388 | 1352 | KGEPGAP <b>P</b> GQVIGG                          |
| Q02388 | 1361 | VIGGEG <b>P</b> GLPGRK                           |
| Q02388 | 1364 | GEG <b>P</b> GL <b>P</b> GRKGDP                  |
| Q02388 | 1370 | PGRKGD <b>P</b> GPSGPP                           |
| Q02388 | 1372 | RKGD <b>P</b> G <b>P</b> SGPPGP                  |
| Q02388 | 1375 | DPG <b>P</b> SG <b>P</b> PGPRGP                  |
| Q02388 | 1376 | PGPSG <b>P</b> PGPRG <b>P</b> L                  |
| Q02388 | 1378 | PSGPPG <b>P</b> RG <b>P</b> LGD                  |
| Q02388 | 1381 | PPGPRG <b>P</b> LGD <b>P</b> GP                  |
| Q02388 | 1387 | PLGD <b>P</b> G <b>P</b> RGPPGL                  |
| Q02388 | 1390 | DPGPRG <b>P</b> PGL <b>P</b> GT                  |
| Q02388 | 1391 | PGPRG <b>P</b> PGL <b>P</b> GTA                  |
| Q02388 | 1394 | RGPPGL <b>P</b> GTAMKG                           |
| Q02388 | 1410 | DRGERG <b>P</b> PG <b>P</b> GEG                  |
| Q02388 | 1411 | RGERG <b>P</b> PG <b>P</b> GEGG                  |
| Q02388 | 1413 | ERGPPG <b>P</b> GEGGIA                           |
| Q02388 | 1420 | GEGGIA <b>P</b> GEPGL <b>P</b>                   |
| Q02388 | 1423 | GIAPGE <b>P</b> GL <b>P</b> GL <b>P</b>          |
| Q02388 | 1426 | PGE <b>P</b> GL <b>P</b> GL <b>P</b> GS <b>P</b> |
| Q02388 | 1429 | PGL <b>P</b> GL <b>P</b> GS <b>P</b> GPQ         |
| Q02388 | 1432 | PGL <b>P</b> GS <b>P</b> GPQGPV                  |
| Q02388 | 1434 | LPGS <b>P</b> GPQGPVGP                           |
| Q02388 | 1437 | SPGPQGPVGP <b>P</b> PGK                          |
| Q02388 | 1440 | PQGPVGP <b>P</b> PGKKGE                          |
| Q02388 | 1441 | QGPVGP <b>P</b> PGKKGEK                          |
| Q02388 | 1455 | DSEDGAPGL <b>P</b> GPQ <b>P</b>                  |
| Q02388 | 1458 | DGAPGL <b>P</b> GQPGS <b>P</b>                   |
| Q02388 | 1469 | SPGEQGP <b>P</b> RGPPGA                          |
| Q02388 | 1472 | EQGPRG <b>P</b> PGAIG <b>P</b>                   |
| Q02388 | 1473 | QGPRG <b>P</b> PGAIG <b>P</b> K                  |
| Q02388 | 1478 | PPGAIG <b>P</b> KGDRGF                           |
| Q02388 | 1485 | KGDRGF <b>P</b> G <b>P</b> LGEA                  |
| Q02388 | 1487 | DRGF <b>P</b> G <b>P</b> LGEAGE                  |
| Q02388 | 1500 | KGERG <b>P</b> GPAGSR                            |
| Q02388 | 1502 | ERGPPG <b>P</b> AGSRGL                           |
| Q02388 | 1509 | AGSRGL <b>P</b> GVAGRP                           |
| Q02388 | 1515 | PGVAGR <b>P</b> GAKGPE                           |
| Q02388 | 1520 | RPGAKG <b>P</b> EGPPGP                           |
| Q02388 | 1523 | AKGPEG <b>P</b> PGPTGR                           |
| Q02388 | 1524 | KGPEG <b>P</b> PGPTGRQ                           |
| Q02388 | 1526 | PEGPPG <b>P</b> TGRQGE                           |
| Q02388 | 1536 | QGEKGE <b>P</b> GRPGDP                           |
| Q02388 | 1539 | KGEPGR <b>P</b> GDP <b>P</b> AVV                 |
| Q02388 | 1542 | PGRPGD <b>P</b> AVVGPA                           |
| Q02388 | 1547 | DPAVVG <b>P</b> AVAGPK                           |
| Q02388 | 1552 | GPAVAG <b>P</b> KGEKGD                           |
| Q02388 | 1561 | EKGDVG <b>P</b> AGPRGA                           |
| Q02388 | 1564 | DVGPA <b>P</b> RGATGV                            |
| Q02388 | 1576 | VQGERG <b>P</b> PGLVLP                           |
| Q02388 | 1577 | QGERG <b>P</b> PGLVLP <b>P</b>                   |

---

---

|        |      |                |
|--------|------|----------------|
| Q02388 | 1582 | PPGLVLPGDPGPK  |
| Q02388 | 1585 | LVLPGDPGPKGDP  |
| Q02388 | 1587 | LPGDPGPKGDPGD  |
| Q02388 | 1591 | PGPKGDPGDRGPI  |
| Q02388 | 1596 | DPGDRGPIGLTGR  |
| Q02388 | 1605 | LTGRAGPPGDSGP  |
| Q02388 | 1606 | TGRAGPPGDSGPP  |
| Q02388 | 1611 | PPGDSGPPGEKGD  |
| Q02388 | 1612 | PGDSGPPGEKGD   |
| Q02388 | 1618 | PGEKGDGRPGPP   |
| Q02388 | 1621 | KGDPGRPGPPGPV  |
| Q02388 | 1623 | DPGRPGPPGPVGP  |
| Q02388 | 1624 | PGRPGPPGPVGP   |
| Q02388 | 1626 | RPGPPGPVGPGR   |
| Q02388 | 1629 | PPGPVGPGRGRDGE |
| Q02388 | 1644 | EKGDEGPPGDPGL  |
| Q02388 | 1645 | KGDEGPPGDPGLP  |
| Q02388 | 1648 | EGPPGDGGLPGKA  |
| Q02388 | 1651 | PGDPGLPGKAGER  |
| Q02388 | 1663 | RGLRGAPGVRGPV  |
| Q02388 | 1668 | APGVRGPVGEKGD  |
| Q02388 | 1678 | KGDQGDPGEDGRN  |
| Q02388 | 1687 | DGRNGSPGSSGPK  |
| Q02388 | 1692 | SPGSSGPKGDRGE  |
| Q02388 | 1699 | KGDRGEPGPPGPP  |
| Q02388 | 1701 | DRGEPGPPGPPGR  |
| Q02388 | 1702 | RGEPGPPGPPGRL  |
| Q02388 | 1704 | EPGPPGPPGRLVD  |
| Q02388 | 1705 | PGPPGPPGRLVDT  |
| Q02388 | 1713 | RLVDTGPGAREKG  |
| Q02388 | 1721 | AREKGEPGDRGQE  |
| Q02388 | 1729 | DRGQEGPRGPKGD  |
| Q02388 | 1732 | QEGPRGPKGDPGL  |
| Q02388 | 1736 | RGPKGDGGLPGAP  |
| Q02388 | 1739 | KGDPGLPGAPGER  |
| Q02388 | 1742 | PGLPGAPGERGIE  |
| Q02388 | 1753 | IEGFRGPPGPQGD  |
| Q02388 | 1754 | EGFRGPPGPQGDP  |
| Q02388 | 1756 | FRGPPGPQGDPGV  |
| Q02388 | 1760 | PGPQGDPGVRGPA  |
| Q02388 | 1774 | EKGDRGPPGLDGR  |
| Q02388 | 1775 | KGDRGPPGLDGRS  |
| Q02388 | 1787 | SGLDGKPGAAGPS  |
| Q02388 | 1792 | KPGAAGPSGPNGA  |
| Q02388 | 1795 | AAGPSGPNGAAGK  |
| Q02388 | 1805 | AGKAGDPGRDGLP  |
| Q02388 | 1811 | PGRDGLPGLRGEQ  |
| Q02388 | 1820 | RGEQGLPGPSGPP  |
| Q02388 | 1822 | EQGLPGPSGPPGL  |
| Q02388 | 1825 | LPGPSGPPGLPGK  |
| Q02388 | 1826 | PGPSGPPGLPGKP  |
| Q02388 | 1829 | SGPPGLPGKPGED  |
| Q02388 | 1832 | PGLPGKPGEDGKP  |
| Q02388 | 1838 | PGEDGKPGLNKGN  |
| Q02388 | 1847 | NGKNGEPGDPGED  |
| Q02388 | 1850 | NGEPGDPGEDGRK  |
| Q02388 | 1873 | REGRDGPKGERGA  |
| Q02388 | 1880 | KGERGAPGILGPQ  |
| Q02388 | 1885 | APGILGPQGPPGL  |

---

---

|        |      |                |
|--------|------|----------------|
| Q02388 | 1888 | ILGPQGPPGLPGP  |
| Q02388 | 1889 | LGPPQGPPGLPGPV |
| Q02388 | 1892 | QGPPGLPGPVGPP  |
| Q02388 | 1894 | PPGLPGPVGPPGQ  |
| Q02388 | 1897 | LPGPVGPVGQGFPG |
| Q02388 | 1898 | PGPVGPVGQGFPG  |
| Q02388 | 1903 | PPGQGFPGVPGGT  |
| Q02388 | 1906 | QGFPGVPGGTGPK  |
| Q02388 | 1911 | VPGGTGPKGDRGE  |
| Q02388 | 1927 | KGEQGLPGERGLR  |
| Q02388 | 1936 | RGLRGEPGSVPNV  |
| Q02388 | 1940 | GEPGSVPNVDRLL  |
| Q02388 | 1972 | SSGSFLVPPERRR  |
| Q02388 | 1974 | GSFLPVPERRRGP  |
| Q02388 | 1980 | PERRRGPKGDSGE  |
| Q02388 | 1989 | DSGEQGPVGKEGP  |
| Q02388 | 1990 | SGEQGPVGKEGPI  |
| Q02388 | 1995 | PPGKEGPVGFPGGE |
| Q02388 | 1999 | EGPIGFPGERGLK  |
| Q02388 | 2013 | DRGDPGPQGPPGL  |
| Q02388 | 2016 | DGPQGPVGLALG   |
| Q02388 | 2017 | PGPQGPVGLALGE  |
| Q02388 | 2026 | ALGERGPPGPSGL  |
| Q02388 | 2027 | LGERGPPGPSGLA  |
| Q02388 | 2029 | ERGPPGPSGLAGE  |
| Q02388 | 2036 | SGLAGEPGKPGIP  |
| Q02388 | 2039 | AGEPGKPGIPGLP  |
| Q02388 | 2042 | PGKPGIPGLPGRA  |
| Q02388 | 2045 | PGIPGLPGRAGGV  |
| Q02388 | 2057 | VGEAGRPGERGER  |
| Q02388 | 2077 | EQGRDGPVGLPGT  |
| Q02388 | 2078 | QGRDGPVGLPGTP  |
| Q02388 | 2081 | DGPPGLPGTPGPP  |
| Q02388 | 2087 | PGTPGPPGPPGPK  |
| Q02388 | 2089 | TPGPPGPPGPKVS  |
| Q02388 | 2090 | PGPPGPPGPKVSV  |
| Q02388 | 2092 | PPGPPGPKVSVDE  |
| Q02388 | 2099 | KVSVDEPGPGLSG  |
| Q02388 | 2101 | SVDEPGPGLSGEQ  |
| Q02388 | 2109 | LSGEQGPVGLKGA  |
| Q02388 | 2110 | SGEQGPVGLKGAK  |
| Q02388 | 2119 | KGAKGEPGSNGDQ  |
| Q02388 | 2127 | SNGDQGPVKGDRGV |
| Q02388 | 2134 | KGDRGVPGIKGDR  |
| Q02388 | 2143 | KGDRGEPGPRGQD  |
| Q02388 | 2145 | DRGEPGPRGQDGN  |
| Q02388 | 2152 | RGQDGNVGLPGER  |
| Q02388 | 2155 | DGNPGLPGERGMA  |
| Q02388 | 2163 | ERGMAGPEGKPGL  |
| Q02388 | 2172 | KPGLQGPVGPVGG  |
| Q02388 | 2175 | LQGPVGPVGGHGD  |
| Q02388 | 2178 | PRGPPGVPVGGHGD |
| Q02388 | 2187 | GHGDPGPVGPVGG  |
| Q02388 | 2191 | PGPPGAPVGLAGPA |
| Q02388 | 2196 | APVGLAGVGPVGG  |
| Q02388 | 2199 | LAGPAGVGPVGG   |
| Q02388 | 2209 | SGLKGEVGETGPP  |
| Q02388 | 2214 | EPGETGPVGRGLT  |
| Q02388 | 2215 | PGETGPVGRGLTG  |

---

---

|        |      |                 |
|--------|------|-----------------|
| Q02388 | 2222 | GRGLTGPTGAVGL   |
| Q02388 | 2231 | AVGLPGPPGPSGL   |
| Q02388 | 2232 | VGLPGPPGPSGLV   |
| Q02388 | 2234 | LPGPPGPSGLVGP   |
| Q02388 | 2240 | PSGLVGPQGPSGL   |
| Q02388 | 2244 | VGPQGPSGLPGQV   |
| Q02388 | 2247 | QGPSGLPGQVGET   |
| Q02388 | 2256 | VGETGKPGAPGRD   |
| Q02388 | 2259 | TGKPGAPGRDGAS   |
| Q02388 | 2277 | RGSPGVPGSPGLP   |
| Q02388 | 2280 | PGVPGSPGLPGPV   |
| Q02388 | 2283 | PGSPGLPGPVGPK   |
| Q02388 | 2285 | SPGLPGPVGPKGE   |
| Q02388 | 2288 | LPGPVGPKGEPGP   |
| Q02388 | 2292 | VGPKGEPGPTGAP   |
| Q02388 | 2294 | PKGEPGPTGAPGQ   |
| Q02388 | 2298 | PGPTGAPGQAVVG   |
| Q02388 | 2306 | QAVVGLPGAKEK    |
| Q02388 | 2315 | KGEKGAPGGLAGD   |
| Q02388 | 2326 | GDLVGEPGAKEGDR  |
| Q02388 | 2335 | KGDRGLPGPRGEK   |
| Q02388 | 2337 | DRGLPGPRGEKGE   |
| Q02388 | 2350 | AGRAGEPGDPGED   |
| Q02388 | 2362 | DGQKGAPGPKGFK   |
| Q02388 | 2364 | QKGAPGPKGFKGD   |
| Q02388 | 2371 | KGFKGDPGVGVPG   |
| Q02388 | 2376 | DPGVGVPGSPGPP   |
| Q02388 | 2379 | VGVPGSPGPPGPP   |
| Q02388 | 2381 | VPGSPGPPGPPGV   |
| Q02388 | 2384 | SPGPPGPPGVKGD   |
| Q02388 | 2385 | PGPPGPPGVKGD    |
| Q02388 | 2394 | KGDLGLPGLPGAP   |
| Q02388 | 2397 | LGLPGLPGAPGVV   |
| Q02388 | 2400 | PGLPGAPGVVGFP   |
| Q02388 | 2406 | PGVVGFPGQTGPR   |
| Q02388 | 2411 | FPGQTGPRGEMGQ   |
| Q02388 | 2418 | RGEMGQGPSGER    |
| Q02388 | 2420 | EMGQGPSGERGL    |
| Q02388 | 2429 | ERGLAGPPGREGI   |
| Q02388 | 2436 | PPGREGI PGPLGPP |
| Q02388 | 2438 | REGIPGPLGPPGP   |
| Q02388 | 2441 | IPGPLGPPGPPGS   |
| Q02388 | 2442 | PGPLGPPGPPGSV   |
| Q02388 | 2444 | PLGPPGPPGSVGP   |
| Q02388 | 2445 | LGPPGPPGSVGPP   |
| Q02388 | 2450 | PPGSVGPPGASGL   |
| Q02388 | 2451 | PGSVGPPGASGLK   |
| Q02388 | 2468 | DPGVGLPGPRGER   |
| Q02388 | 2470 | GVGLPGPRGERGE   |
| Q02388 | 2477 | RGERGE PGIRGED  |
| Q02388 | 2486 | RGEDGRPGQEGPR   |
| Q02388 | 2491 | RPGQEGPRGLTGP   |
| Q02388 | 2498 | RGLTGP PGSRGER  |
| Q02388 | 2528 | SAVILGPPGPRGA   |
| Q02388 | 2529 | AVILGPPGPRGAK   |
| Q02388 | 2531 | ILGPPGPRGAKGD   |
| Q02388 | 2543 | DMGERGPRGLDGD   |
| Q02388 | 2552 | LDGDKGPRGDNGD   |
| Q02388 | 2559 | RGDNGD PGDKGSK  |

---

---

|        |      |                                                  |
|--------|------|--------------------------------------------------|
| Q02388 | 2568 | KGSKGE <b>P</b> GDKGSA                           |
| Q02388 | 2577 | KGSAGL <b>P</b> GLRGLL                           |
| Q02388 | 2585 | LRGLLG <b>P</b> QGQPGA                           |
| Q02388 | 2589 | LG <b>P</b> QGQ <b>P</b> GAAGIP                  |
| Q02388 | 2595 | PGAAGI <b>P</b> GD <b>P</b> GS <b>P</b>          |
| Q02388 | 2598 | AGIPGD <b>P</b> GS <b>P</b> KG <b>D</b>          |
| Q02388 | 2601 | PGD <b>P</b> GS <b>P</b> KG <b>D</b> GV <b>P</b> |
| Q02388 | 2607 | PGK <b>D</b> GV <b>P</b> GIRGEK                  |
| Q02388 | 2621 | DVGFMG <b>P</b> RGLKGE                           |
| Q02388 | 2648 | DKGEAG <b>P</b> PGR <b>P</b> GL                  |
| Q02388 | 2649 | KGEAG <b>P</b> PGR <b>P</b> GLA                  |
| Q02388 | 2652 | AG <b>P</b> PGR <b>P</b> GLAGHK                  |
| Q02388 | 2681 | KEGLIG <b>P</b> KGDRGF                           |
| Q02388 | 2691 | RGFDGQ <b>P</b> G <b>P</b> KGDQ                  |
| Q02388 | 2693 | FDGQ <b>P</b> G <b>P</b> KGDQGE                  |
| Q02388 | 2706 | KGERGT <b>P</b> GIGGF <b>P</b>                   |
| Q02388 | 2712 | PGIGGF <b>P</b> G <b>P</b> SGND                  |
| Q02388 | 2714 | IGGF <b>P</b> G <b>P</b> SGNDGS                  |
| Q02388 | 2723 | NDGSAG <b>P</b> P <b>G</b> PPGS                  |
| Q02388 | 2724 | DGSAG <b>P</b> P <b>G</b> PPGSV                  |
| Q02388 | 2732 | PPGSVG <b>P</b> R <b>G</b> PEGL                  |
| Q02388 | 2747 | QKGERG <b>P</b> PGERVV                           |
| Q02388 | 2748 | KGERG <b>P</b> PGERVVG                           |
| Q02388 | 2756 | ERVVGAP <b>G</b> V <b>P</b> GAP                  |
| Q02388 | 2759 | VGAPGV <b>P</b> GAPGER                           |
| Q02388 | 2762 | PGV <b>P</b> GAP <b>G</b> ERGEQ                  |
| Q02388 | 2815 | IASGSR <b>P</b> L <b>P</b> SYAA                  |
| Q02388 | 2817 | SGSR <b>P</b> L <b>P</b> SYAADT                  |
| Q02388 | 2832 | SQLHAV <b>P</b> VLRVSH                           |
| Q02388 | 2846 | EEEEERV <b>P</b> PE <b>D</b> DEY                 |
| Q02388 | 2847 | EEERV <b>P</b> PE <b>D</b> DEYS                  |
| Q02388 | 2866 | VEEYQD <b>P</b> EAPWDS                           |
| Q02388 | 2869 | YQD <b>P</b> EAPWDSDDP                           |
| Q02388 | 2875 | PWDSDD <b>P</b> CSL <b>P</b> LD                  |
| Q02388 | 2879 | DD <b>P</b> CSL <b>P</b> LDEGSC                  |
| Q02388 | 2906 | STEACH <b>P</b> FBVYGGC                          |
| Q02388 | 2930 | ACERRC <b>P</b> PRVVQS                           |
| Q02388 | 2931 | CERRC <b>P</b> PRVVQSQ                           |
| P23805 | 5    | @@MLLL <b>P</b> LSVLLL                           |
| P23805 | 15   | LLLLLTQ <b>P</b> W <b>R</b> SLGA                 |
| P23805 | 42   | TLVMCS <b>P</b> LESGL <b>P</b>                   |
| P23805 | 48   | PLESGL <b>P</b> GH <b>D</b> GQD                  |
| P23805 | 59   | QDGREC <b>P</b> HGEKGD                           |
| P23805 | 66   | HGEKGD <b>P</b> G <b>S</b> PGPA                  |
| P23805 | 69   | KGD <b>P</b> GS <b>P</b> G <b>P</b> AGRA         |
| P23805 | 71   | DPG <b>S</b> PG <b>P</b> AGRAGR                  |
| P23805 | 83   | RPGWVG <b>P</b> IG <b>P</b> KGD                  |
| P23805 | 86   | WVG <b>P</b> IG <b>P</b> KGDNGF                  |
| P23805 | 98   | FVGEPG <b>P</b> KGDTGP                           |
| P23805 | 104  | PKGDTG <b>P</b> R <b>G</b> PPGM                  |
| P23805 | 107  | DTGPRG <b>P</b> P <b>G</b> MPGP                  |
| P23805 | 113  | PPGMPG <b>P</b> AGREG <b>P</b>                   |
| P23805 | 119  | PAGREG <b>P</b> SGKQGS                           |
| P23805 | 128  | KQGSMB <b>P</b> PGT <b>P</b> GP                  |
| P23805 | 134  | PPGT <b>P</b> G <b>P</b> KGETGP                  |
| P23805 | 140  | PKGETG <b>P</b> KGGVGA                           |
| P23805 | 155  | IQGF <b>P</b> G <b>P</b> SLKGE                   |
| P23805 | 165  | KGEKGAP <b>P</b> ETGAP                           |
| P23805 | 179  | RAGVTG <b>P</b> SGAIG <b>P</b>                   |

---

---

|        |     |                 |
|--------|-----|-----------------|
| P23805 | 185 | PSGAIGPQGPSGA   |
| P23805 | 188 | AIGPQGPARGP     |
| P23805 | 194 | PSGARGPPGLKGD   |
| P23805 | 204 | KGDRGDGETGAK    |
| P23805 | 249 | KKAVLFPDQAVG    |
| P23805 | 285 | KGQLASPRSSAEN   |
| P23805 | 321 | EGRFTYPTGEILV   |
| P23805 | 336 | NWADGEPNNSDEG   |
| P23805 | 344 | NSDEGQPENCVEI   |
| P23805 | 352 | NCVEIFPDGKWND   |
| P23805 | 360 | GKWNDVPCSKQLL   |
| P29602 | 16  | NTGWSVPSSPNFY   |
| P29602 | 19  | WSVPSSPNFYSQW   |
| P29602 | 42  | SLQFNFPANAHNV   |
| P29602 | 74  | DVERTSPVIERLD   |
| P58924 | 15  | FVLFFFLLFTLASSL |
| P58924 | 37  | TRLKSDFYRALAR   |
| Q9BPG6 | 34  | DDVPLSLRDNLK    |
| Q25460 | 5   | @TKHEPVYKPKV    |
| Q25460 | 9   | HEPVYKPKVTSYS   |
| Q25460 | 17  | KTSYSAPYKPPTY   |
| Q25460 | 20  | YSAPYKPTYQPL    |
| Q25460 | 21  | SAPYKPTYQPLK    |
| Q25460 | 25  | KPPTYQPLKKKVD   |
| Q25460 | 34  | KKVDYRPTKSYPP   |
| Q25460 | 39  | RPTKSYPTYGSK    |
| Q25460 | 40  | PTKSYPTYGSKT    |
| Q25460 | 50  | SKTNYLPLAKKLS   |
| Q25460 | 60  | KLSSYKPIKTTYN   |
| Q25460 | 72  | NAKTNYPPVYKPK   |
| Q25460 | 73  | AKTNYPVYKPKM    |
| Q25460 | 77  | YPPVYKPKMTYPP   |
| Q25460 | 82  | KPKMTYPTYKPK    |
| Q25460 | 83  | PKMTYPTYKPKP    |
| Q25460 | 87  | YPPTYKPKPSYPP   |
| Q25460 | 99  | PTYKSKPTYKPKI   |
| Q25460 | 103 | SKPTYKPKITYPP   |
| Q25460 | 123 | YPSSYKPKKTYPP   |
| Q25460 | 168 | KTKKTYPSSYKAK   |
| Q25460 | 205 | PTYKAKPTYKAKP   |
| Q25460 | 492 | KSKSSYPSSYKPK   |
| Q25460 | 507 | YPPTYKPKLTYKP   |
| Q25460 | 691 | PTYKAKPTNPSTY   |
| Q25460 | 694 | KAKPTNPSTYKAK   |
| Q25460 | 821 | YPPSYKPKITYPS   |
| Q25460 | 826 | KPKITYPSTYKLK   |
| Q25460 | 846 | KSKTSYPPTYNKK   |
| Q25460 | 847 | SKTSYPPTYNKKI   |
| Q25460 | 856 | NKKISYPSSYKAK   |
| Q25460 | 871 | YPPAYKPTNRY@@   |
| P85065 | 9   | SWSLCTPGCTSPG   |
| P19999 | 43  | RDGRDGPKEKGE    |
| P19999 | 50  | KGEKGEPGQGLRG   |
| P19999 | 60  | LRGLQGPGLGP     |
| P19999 | 66  | PPGKLGPGLSGA    |
| P19999 | 78  | APGSQGPKGQKGD   |
| P19999 | 137 | TNHERMPFSKVK    |
| P19999 | 155 | RGTVAIPRNAEEN   |
| P19999 | 203 | NWKKDEPNHGS     |

---

---

|        |     |                  |
|--------|-----|------------------|
| P08661 | 30  | GAQSSCPVIACSS    |
| P08661 | 37  | VIACSSPGLNGFP    |
| P08661 | 43  | PGLNGFPGKDGH     |
| P08661 | 74  | PPGKVGPPAGPPGN   |
| P08661 | 77  | KVGPA GP GNP PGS |
| P08661 | 78  | VGPAGP GNP GSK   |
| P08661 | 81  | AGPPGNPGSKGAT    |
| P08661 | 89  | SKGATGPKGDRGE    |
| P08661 | 143 | SSVRRMPLNRAKA    |
| P08661 | 209 | NWNEGEPNNVGS     |
| P08661 | 231 | GKWNDVPCSDSFL    |
| Q941C7 | 25  | SSLARNPVS VSGG   |
| Q941C7 | 52  | VEDYGDPSANPKH    |
| Q941C7 | 56  | GDPSANPKHDPGV    |
| Q941C7 | 60  | ANPKHDPGVPPSA    |
| P00877 | 3   | @@@MV PQ TETKA   |
| P00877 | 27  | RLTYYT PDYVVRD   |
| P00877 | 44  | AAFRMT PQLGVPP   |
| P00877 | 49  | TPQLGV PPEECGA   |
| P00877 | 50  | PQLGV PPEECGAA   |
| P00877 | 89  | RCYDIE PVPGEDN   |
| P00877 | 91  | YDIEPVPGEDNQY    |
| P00877 | 141 | LEDLRI PPAYVKT   |
| P00877 | 142 | EDLRI PPAYVKTF   |
| P00877 | 152 | KTFVGP PHGIQVE   |
| P00877 | 176 | LGCTIK PKLGLSA   |
| P00877 | 210 | ENVNSQ PFMRWRD   |
| P00877 | 263 | AKELGVPI IMHDY   |
| P00877 | 372 | QDWCSM PGVMPVA   |
| P00877 | 376 | SMPGVMPVASGGI    |
| P00877 | 388 | IHVWHM PALVEIF   |
| P00877 | 410 | GGTLGH PWGNAPG   |
| P00877 | 415 | HPWGNAPGAAANR    |
| P00877 | 453 | SACKWS PELAAAC   |
| P08427 | 56  | VKGDGP PGPMGP    |
| P08427 | 59  | DPGPPG PMGPPGG   |
| P08427 | 62  | PPGPMG PGGMGP    |
| P08427 | 79  | DGLPGAP GAPGER   |
| P08427 | 82  | PGAPGAP GERGDK   |
| P08427 | 91  | RGDKGE PGERGLP   |
| P08427 | 97  | PGERGL PGFPAYL   |
| P08427 | 100 | RGLPGF PAYLDEE   |
| P08427 | 165 | GGNIAV PRTPEEN   |
| P08427 | 168 | IAVPRT PEENEAI   |
| P08427 | 195 | MIEDQT PGDFHYL   |
| P08427 | 213 | NYTNWY PGEPRGQ   |
| P08427 | 216 | NWYPGE PRGQKE    |

---
