# Supplementary material for: iHyd-PseAAC: Predicting Hydroxyproline and Hydroxylysine in Proteins by Incorporating Dipeptide Position-Specific Propensity into Pseudo Amino Acid Composition
Source: MDPI journal article supplement (doi:10.3390/ijms15057594), 2014-05-05
Supplement: s1 [file s1]

## Supplementary Information

**Supplementary Information S6.** The 31 experimentally validated hydroxylysine proteins and their hydroxylated sites retrieved from Swiss-Prot database.

| Uniprot ID | Position |
|------------|----------|
| Q3Y5Z3     | 28       |
| Q3Y5Z3     | 60       |
| Q3Y5Z3     | 63       |
| Q3Y5Z3     | 72       |
| Q3Y5Z3     | 96       |
| Q60994     | 68       |
| Q60994     | 71       |
| Q60994     | 80       |
| Q60994     | 104      |
| Q15848     | 33       |
| Q15848     | 65       |
| Q15848     | 68       |
| Q15848     | 77       |
| Q15848     | 101      |
| P02745     | 33       |
| P02745     | 48       |
| P02745     | 67       |
| P02745     | 100      |
| P02745     | 103      |
| P02747     | 57       |
| P02747     | 75       |
| Q4ZJN1     | 73       |
| Q4ZJN1     | 127      |
| P30754     | 96       |
| P30754     | 108      |
| P30754     | 183      |
| P30754     | 192      |
| P30754     | 261      |
| P30754     | 279      |
| P30754     | 342      |
| P30754     | 351      |
| P30754     | 546      |
| P30754     | 567      |
| P30754     | 573      |
| P30754     | 612      |
| P30754     | 657      |
| P30754     | 738      |
| P30754     | 765      |
| P30754     | 810      |
| P30754     | 927      |
| P30754     | 933      |
| P30754     | 936      |
| P30754     | 939      |
| P04142     | 47       |
| P02457     | 254      |
| P02457     | 419      |
| P02457     | 494      |
| P02457     | 740      |
| P02457     | 851      |
| P02457     | 1022     |
| P02457     | 1085     |
| P02457     | 1097     |
| P02453     | 264      |
| P02453     | 276      |

---

|        |      |
|--------|------|
| P02453 | 285  |
| P02453 | 708  |
| P02453 | 780  |
| P02453 | 861  |
| P02453 | 933  |
| P02453 | 1095 |
| P02453 | 1107 |
| P02452 | 265  |
| P02452 | 1108 |
| P02454 | 254  |
| P02454 | 575  |
| P02454 | 698  |
| P02459 | 190  |
| P02459 | 287  |
| P02459 | 299  |
| P02459 | 308  |
| P02459 | 374  |
| P02459 | 419  |
| P02459 | 452  |
| P02459 | 464  |
| P02459 | 470  |
| P02459 | 527  |
| P02459 | 542  |
| P02459 | 608  |
| P02459 | 620  |
| P02459 | 1130 |
| P04258 | 95   |
| P04258 | 107  |
| P04258 | 119  |
| P04258 | 938  |
| P04258 | 950  |
| P02461 | 263  |
| P02461 | 284  |
| P02461 | 860  |
| P02461 | 977  |
| P02461 | 1094 |
| P02461 | 1106 |
| P20908 | 627  |
| P20908 | 642  |
| P20908 | 708  |
| P20908 | 744  |
| P20908 | 774  |
| P20908 | 795  |
| P20908 | 804  |
| P20908 | 807  |
| P20908 | 810  |
| P20908 | 819  |
| P20908 | 846  |
| P20908 | 864  |
| P20908 | 882  |
| P20908 | 897  |
| P12111 | 2103 |
| P12111 | 2209 |
| P12111 | 2212 |
| P12111 | 2322 |
| P12111 | 2337 |
| Q02388 | 2625 |
| Q02388 | 2631 |
| P12108 | 181  |

---

---

|        |      |
|--------|------|
| Q05707 | 1476 |
| Q05707 | 1485 |
| Q05707 | 1523 |
| Q05707 | 1526 |
| Q05707 | 1601 |
| Q05707 | 1698 |
| Q05707 | 1701 |
| P23805 | 63   |
| P23805 | 87   |
| P23805 | 99   |
| P23805 | 135  |
| P23805 | 141  |
| P23805 | 159  |
| P23805 | 162  |
| P23805 | 198  |
| P23805 | 210  |
| P0A6N4 | 34   |
| Q9Y383 | 266  |
| Q9Y383 | 269  |
| P19999 | 44   |
| P19999 | 47   |
| P19999 | 79   |
| P19999 | 82   |
| Q00433 | 56   |
| P30943 | 41   |
| P35248 | 86   |
| P35248 | 98   |
| Q9SE35 | 174  |
| Q9SE35 | 193  |
| Q9SE35 | 212  |
| Q9SE35 | 231  |
| Q9SE35 | 250  |
| P01170 | 120  |
| O18495 | 27   |
| O18495 | 30   |
| O18495 | 34   |
| O18495 | 38   |
| O18495 | 40   |
| O18495 | 44   |
| P26368 | 15   |
| P26368 | 276  |

---
