# Supplementary material for: iHyd-PseAAC: Predicting Hydroxyproline and Hydroxylysine in Proteins by Incorporating Dipeptide Position-Specific Propensity into Pseudo Amino Acid Composition
Source: MDPI journal article supplement (doi:10.3390/ijms15057594), 2014-05-05
Supplement: s1 [file s1]

## Supplementary Information

**Supplementary Information S2.** The positive dataset  $\mathbb{S}_{\text{Hyl}}^+$  contains 107 hydroxylysine peptide fragments and the negative dataset  $\mathbb{S}_{\text{Hyl}}^-$  contains 836 non-hydroxylysine peptide fragments. None of the sequences included has  $\geq 80\%$  pairwise sequence identity with any other in a same subset. See the main text for further explanation.

| Positive dataset |      |                        |
|------------------|------|------------------------|
| Uniprot ID       | Site | Sequence               |
| Q05707           | 1601 | PGVPGA <b>K</b> GERGER |
| P02457           | 1085 | QGPRGD <b>K</b> GETGEQ |
| P04258           | 95   | PGPPGM <b>K</b> GPAGMP |
| Q02388           | 2631 | KGERGV <b>K</b> GACGLD |
| P20908           | 627  | PGQTGP <b>K</b> GDRGFD |
| P02459           | 542  | SGLAGP <b>K</b> GANGDP |
| Q3Y5Z3           | 63   | PGEKGE <b>K</b> GDPGLV |
| P23805           | 99   | VGEPPG <b>K</b> GDTGPR |
| P23805           | 87   | VGPIGP <b>K</b> GDNGFV |
| O18495           | 38   | VGKFYY <b>K</b> HKYYIK |
| P02459           | 308  | AGAPGV <b>K</b> GESGSP |
| Q3Y5Z3           | 96   | PGTPGR <b>K</b> GEPGES |
| P30754           | 351  | SGEPGA <b>K</b> GPTGDT |
| P02745           | 48   | RGRPGL <b>K</b> GEQGEP |
| P20908           | 642  | AGLPGE <b>K</b> GHRGDP |
| P04258           | 950  | RGAMGI <b>K</b> GHRGFP |
| Q9Y383           | 269  | SHSKNP <b>K</b> RSRSRE |
| P20908           | 846  | DGPEGP <b>K</b> GRGGPN |
| Q02388           | 2625 | MGPRGL <b>K</b> GERGVK |
| P02745           | 33   | RAPDGK <b>K</b> GEAGRP |
| P26368           | 15   | RQLNEN <b>K</b> QERDKE |
| P23805           | 63   | ECPHGE <b>K</b> GDPGSP |
| P20908           | 774  | EGPPGE <b>K</b> GGQGPP |
| P23805           | 159  | PGPSGL <b>K</b> GEKGAP |
| P12111           | 2322 | PGYPGP <b>K</b> GNPGEP |
| P20908           | 708  | DGQPGP <b>K</b> GNVGPQ |
| P20908           | 897  | PGANGE <b>K</b> GGRGTP |
| P02459           | 299  | PGLDGA <b>K</b> GEAGAP |
| P02459           | 287  | PGLPGV <b>K</b> GHRGYP |
| P02457           | 494  | DGIAGP <b>K</b> GPPGER |
| P02459           | 419  | DGIPGA <b>K</b> GSAGAP |
| P02457           | 740  | RGDPGP <b>K</b> GADGAP |
| Q60994           | 80   | AGLLGP <b>K</b> GETGDV |
| P02459           | 374  | PGAPGA <b>K</b> GEAGPT |
| P12111           | 2209 | RGPPGA <b>K</b> GNKGGP |
| P26368           | 276  | LNDDQV <b>K</b> ELLTSF |
| P35248           | 98   | AGEPPG <b>K</b> GERGLV |
| Q3Y5Z3           | 60   | DGTPGE <b>K</b> GEKGDP |
| P12108           | 181  | NCPPGP <b>K</b> GPQGLQ |
| Q3Y5Z3           | 28   | EDPPLP <b>K</b> GACAGW |
| P84698           | 25   | GYPCVN <b>K</b> ACSGCT |
| O18495           | 27   | EAGWLR <b>K</b> AAKSVG |
| P84698           | 18   | NGWECC <b>K</b> GYPNVN |
| P02461           | 284  | TGAPGL <b>K</b> GENGLP |
| P02459           | 452  | TGPLGP <b>K</b> GQTGEP |
| Q00433           | 56   | AGAAMD <b>K</b> SAKAPQ |
| P30754           | 546  | PGVAGA <b>K</b> GQGGPP |
| P20908           | 795  | PGPRGV <b>K</b> GADGIR |

---

|        |      |               |
|--------|------|---------------|
| P02747 | 75   | RGPKGQKGEPGLP |
| P20908 | 804  | DGIRGLKGTGKEK |
| O18495 | 30   | WLRKAAKSVGKFY |
| Q05707 | 1523 | PGMPGEKGEKGD  |
| P83415 | 21   | IRDGVIKAAPAIE |
| P23805 | 141  | KGETGPKGGVGAP |
| Q15848 | 101  | PGIQGRKGEPGEG |
| P04258 | 107  | PGFPGMKGHRGFD |
| P30943 | 41   | VNMAMDKSAKAPV |
| P02745 | 67   | TGIQGLKGDQGE  |
| P02457 | 419  | SGAPGPKGNSGEP |
| O18495 | 34   | AAKSVGKFYYKHK |
| P20908 | 807  | RGLKGTKGEKGED |
| P20908 | 819  | DGFPGFKGDMGIK |
| P30754 | 933  | KGEAGGKGAKGDK |
| P02747 | 57   | DGLPGPKGEPGIP |
| P02459 | 470  | KGEQGPKGEPGPA |
| O18495 | 44   | KHKYYIKAAWQIG |
| P12111 | 2337 | NGTTGPKGIRGRR |
| P02459 | 464  | PGIAGFKGEQGP  |
| P19999 | 47   | DGPKGEKGEPGQG |
| Q3Y5Z3 | 72   | PGLVGPKGDGTET |
| Q9SE35 | 174  | GSYSGSKGSKRRI |
| P30754 | 183  | PGTPGSKGDRGQS |
| P02461 | 860  | PGPQGVKGERGSP |
| Q4ZJN1 | 73   | DGIRGEKGEPGAD |
| P02459 | 608  | MGFPGPKGANGEP |
| P02745 | 100  | RGIPGIKGTKGSP |
| P30754 | 342  | MGIPGEKGPSGEP |
| P23805 | 210  | PGETGAKGESGLA |
| P19999 | 44   | DGRDGPKEKGE   |
| P23805 | 135  | PGTPGPKGETGPK |
| Q05707 | 1485 | QGEPPGKGPDPGR |
| P02457 | 1097 | QGDRGMKGHRGFS |
| P20908 | 864  | LGPPGEKGKLGVP |
| P35248 | 86   | RGPVGPKGENGSA |
| Q05707 | 1701 | TGIKGEKGNPGVG |
| Q4ZJN1 | 127  | QGQKGDKGEVGPT |
| P04258 | 119  | DGRNGEKGEPGAP |
| P30754 | 567  | PGERGPKGVGGSK |
| P02457 | 851  | VGAPGPKGARGSA |
| P02745 | 103  | PGIKGTKGSPGNI |
| P20908 | 882  | PGRQGPKGSIGFP |
| O18495 | 40   | KFYYKHYYIKAA  |
| P20908 | 744  | IGPPGEKGPLGKP |
| P23805 | 162  | SGLKGEKGAPGET |
| P30754 | 939  | KGAKGDKGWTGLP |
| P12111 | 2212 | PGAKGNKGGPGQP |
| Q05707 | 1698 | RGLTGIKGEKGNP |
| P23805 | 198  | RGPPGLKGDRGDP |
| P20908 | 810  | KGTGKEKGEDGFP |
| Q05707 | 1476 | PGLRGPKGQQGEP |
| Q9Y383 | 266  | RSRSHSKNPKRSR |
| P01170 | 120  | CKNFYWKGFTSC@ |
| P02459 | 620  | PGKAGEKGLPGAP |
| P12111 | 2103 | RGFPGEKGEVGEI |
| P02457 | 254  | AGLPGMKGHRGFS |
| P04142 | 47   | IRDGIVKAGPAIE |
| P02457 | 1022 | DGAAGPKGDRGET |

---

## Negative dataset

| Uniprot ID | Site | Sequence         |
|------------|------|------------------|
| Q3Y5Z3     | 129  | VPIRFTKIFYNQQ    |
| Q3Y5Z3     | 144  | YDGTGKFLCNIP     |
| Q3Y5Z3     | 164  | HITVYLKDVKVSL    |
| Q3Y5Z3     | 167  | VYLKDVKVSLYKN    |
| Q3Y5Z3     | 172  | VKVS LYKNDKALL   |
| Q3Y5Z3     | 175  | SLYKNDKALLFTH    |
| Q3Y5Z3     | 187  | HDQFQDKNVDQAS    |
| Q3Y5Z3     | 202  | VLLYLEKGDQVWL    |
| Q15848     | 33   | VLLPLPKGACTGW    |
| Q15848     | 172  | VYMKDVKVSLFKK    |
| Q15848     | 177  | VKVSLFKKDKAML    |
| Q15848     | 178  | KVSLFKKDKAMLF    |
| Q15848     | 180  | SLFKKDKAMLFY     |
| Q60994     | 36   | ALVPPPKGTCAGW    |
| Q60994     | 195  | YDQYQEKNVDQAS    |
| Q4ZJN1     | 49   | DGRDGAKGDKGDA    |
| Q4ZJN1     | 52   | DGAKGDKG DAGEP   |
| Q4ZJN1     | 66   | HPGGPGKDGIRGE    |
| Q4ZJN1     | 85   | DGRVEAKGIKGD     |
| Q4ZJN1     | 88   | VEAKGIKGDPGSR    |
| Q4ZJN1     | 99   | SRGSPGKHGPKGS    |
| Q4ZJN1     | 103  | PGKHGPKGSIGPT    |
| Q4ZJN1     | 124  | TGPQGGKGDKEV     |
| Q4ZJN1     | 148  | TGPLGPKGLPGPM    |
| Q4ZJN1     | 159  | PMGP IGP GPRGE   |
| Q4ZJN1     | 184  | RGMRGWK GDRGEK   |
| Q4ZJN1     | 190  | KGDRGEKGVGEA     |
| Q4ZJN1     | 192  | DRGEKGVGEAPL     |
| Q4ZJN1     | 201  | EAPLVPKSAFTVG    |
| Q4ZJN1     | 213  | GLTVISKFP PDA    |
| Q4ZJN1     | 222  | PPDAPIKFDKILY    |
| Q4ZJN1     | 225  | APIKFDKILYNEL    |
| Q4ZJN1     | 240  | YNVATGKFTCHVA    |
| Q4ZJN1     | 268  | VQVSLVKNGVKVL    |
| Q4ZJN1     | 272  | LVKNGVKVLHTKD    |
| Q4ZJN1     | 277  | VKVLHTKDSYMSS    |
| Q4ZJN1     | 296  | GIVQELKLGDEVW    |
| P30754     | 50   | PMGP IGP KRGPPGP |
| P30754     | 62   | PAGIAGKSGDDGR    |
| P30754     | 96   | PGMPGPKGHRGFR    |
| P30754     | 108  | RGLSGSKGEQGKS    |
| P30754     | 113  | SKGEQKSGNQGP     |
| P30754     | 146  | ERGRDGKSGLPGL    |
| P30754     | 192  | RGQSGIKGAQGLQ    |
| P30754     | 261  | PGQAGAKGDGGPT    |
| P30754     | 279  | PGAPGVKGSSGPP    |
| P30754     | 299  | HAGEAGKRGSPGS    |
| P30754     | 383  | SDGRPGKDGRPGI    |
| P30754     | 392  | RPGIRGKD GKQGE   |
| P30754     | 395  | IRGKD GKQGEQGP   |
| P30754     | 425  | ARGE PGKNGAPGE   |
| P30754     | 443  | EQGDAGKDGETGA    |
| P30754     | 488  | TPGEAGKTGERGA    |
| P30754     | 573  | KGVGGSKGSRGDI    |
| P30754     | 584  | DIGPRGKAGERGK    |
| P30754     | 590  | KAGERGKDGERGE    |

---

|        |      |                 |
|--------|------|-----------------|
| P30754 | 612  | SGLAASKGERGDM   |
| P30754 | 657  | AGPAGTKGDIGFP   |
| P30754 | 674  | TRGATGKQGARGP   |
| P30754 | 686  | PRGLAGKRGLRGA   |
| P30754 | 734  | PAGTAGKQGVKGA   |
| P30754 | 738  | AGKQGVKGARGSP   |
| P30754 | 749  | SPGLVGKQGDRGS   |
| P30754 | 765  | PGRDGTKGERGED   |
| P30754 | 810  | MGGQGMKGDGGPP   |
| P30754 | 851  | QEGAPGKDGLPGL   |
| P30754 | 927  | AGIMGMKGEAGGK   |
| P30754 | 936  | AGGKGAKGDKGWT   |
| P30754 | 986  | SQGPPGKDGQPGP   |
| P02457 | 43   | GLTYNDKDVWKPE   |
| P02457 | 47   | NDKDVWKPPECQI   |
| P02457 | 107  | AGVEGPKGDTGPR   |
| P02457 | 160  | SYGYDEKSAGVAV   |
| P02457 | 217  | PAGPPGKNGDDGE   |
| P02457 | 226  | DDGEAGKPGRPGQ   |
| P02457 | 266  | SGLDGAKGQPGPA   |
| P02457 | 275  | PGPAGPKGEPGSP   |
| P02457 | 341  | PGAAGAKGETGPQ   |
| P02457 | 386  | DGQPGA KGATGAP  |
| P02457 | 431  | PGAPGNKGD TGAK  |
| P02457 | 437  | KGDTGAKGEPGPA   |
| P02457 | 457  | PAGEEGKRGARGE   |
| P02457 | 509  | PGAVGPKGSPGEA   |
| P02457 | 527  | AGLPGA KGLTGSP  |
| P02457 | 541  | SPGPDGKTGPPGP   |
| P02457 | 575  | MGFPGP KGAAGEP  |
| P02457 | 583  | AAGEPGKPGERGA   |
| P02457 | 601  | AVGAAGKDGEAGA   |
| P02457 | 646  | PPGEAGKPGEQGV   |
| P02457 | 698  | PGNDGA KG DAGAP |
| P02457 | 731  | AGLPGA KGDRGDP  |
| P02457 | 748  | ADGAPGKDGLRGL   |
| P02457 | 770  | AGAPGD KGEAGPP  |
| P02457 | 815  | DGQPGA KGETGDA  |
| P02457 | 824  | TGDAGA KG DAGPP |
| P02457 | 892  | PPGPAGKZGSKGP   |
| P02457 | 896  | AGKZGS KGPRGET  |
| P02457 | 923  | PGPPGE KGSPGAD  |
| P02457 | 973  | PSGEPG KQGPSGA  |
| P02457 | 1051 | PVGPAG KNGDRGE  |
| P02457 | 1141 | SAGAAGKDGLNGL   |
| P02457 | 1197 | PQPPQEKAHDGGR   |
| P02457 | 1225 | EVDTTLKSLSQQI   |
| P02457 | 1242 | SPEGTRKNPARTC   |
| P02457 | 1252 | RTCRDLKMCHGDW   |
| P02457 | 1259 | MCHGDWKSGEYWI   |
| P02457 | 1277 | CNLDAI KVYCNME  |
| P02457 | 1299 | QATIAQKNWYLSK   |
| P02457 | 1305 | KNWYLSKNPKEKK   |
| P02457 | 1308 | YLSKNPKEKKHVW   |
| P02457 | 1310 | SKNPKEKKHVWFG   |
| P02457 | 1311 | KNPKEKKHVWFGE   |
| P02457 | 1360 | NVTYHC KNSVAYM  |
| P02457 | 1374 | HDTGNLKKALLLQ   |
| P02457 | 1375 | DTGNLKKALLLQG   |

---

---

|        |      |                |
|--------|------|----------------|
| P02457 | 1413 | HTGAWGKTVIEWYK |
| P02457 | 1419 | KTVIEYKTTKTSR  |
| P02457 | 1422 | IEYKTTKTSRLPI  |
| P02459 | 30   | HGQDVQKAGSCVQ  |
| P02459 | 73   | IICEDMKDCLSP   |
| P02459 | 103  | SGQPGPKGQKGEP  |
| P02459 | 106  | PGPKGQKGEPGDI  |
| P02459 | 113  | GEPGDIKDIVGPK  |
| P02459 | 119  | KDIVGPKGPPGPQ  |
| P02459 | 140  | RGDRGDKEKGAP   |
| P02459 | 143  | RGDKGEKGAPGPR  |
| P02459 | 190  | AGGFDEKAGGAQM  |
| P02459 | 259  | DDGEAGKPGKSGE  |
| P02459 | 262  | EAGKPGKSGERGP  |
| P02459 | 574  | DAGPQGVGPGSGA  |
| P02459 | 616  | ANGEKAGEKGL    |
| P02459 | 634  | LRGLPGKDGETGA  |
| P02459 | 731  | PGTDGPKGAAAGPA |
| P02459 | 764  | AGIAGPKGDRGDV  |
| P02459 | 773  | RGDVGEKGPEGAP  |
| P02459 | 781  | PEGAPKDGGRGL   |
| P02459 | 803  | AGANGEKGEVGPP  |
| P02459 | 857  | QGEAGQKGDAGAP  |
| P02459 | 884  | TGVTGPKGARGAQ  |
| P02459 | 925  | PPGPSKDGPKGA   |
| P02459 | 929  | SGKDGPKGARGDS  |
| P02459 | 956  | AGPPGEKGEPGDD  |
| P02459 | 1055 | DGAAGVKGDRGET  |
| P02459 | 1084 | PAGPIGKQGDRGE  |
| P02459 | 1118 | QGPRGDKGETGEA  |
| P02459 | 1130 | AGERGLKGHRGFT  |
| P02459 | 1174 | PVGPSKDGANGI   |
| P02459 | 1231 | GLGQREKGPDPLO  |
| P02459 | 1260 | EVDATLKSLNNQI  |
| P02459 | 1287 | RTCRDLKLCHPEW  |
| P02459 | 1294 | LCHPEWKSVDYWI  |
| P02459 | 1312 | CTLDAMKVFCNME  |
| P02459 | 1333 | NPASVPKNWWS    |
| P02459 | 1334 | PASVPKNWWSK    |
| P02459 | 1340 | KNWWSKSKDKKH   |
| P02459 | 1342 | WWSSKSKDKKHIW  |
| P02459 | 1344 | SSKSKDKKHIWFG  |
| P02459 | 1345 | SKSKDKKHIWFG   |
| P02459 | 1394 | NITYHCKNSIAYL  |
| P02459 | 1408 | EAAGNLKALLIQ   |
| P02459 | 1409 | AAGNLKALLIQG   |
| P02459 | 1435 | FTYTVLKDGCCKH  |
| P02459 | 1440 | LKDGCTKHTGKWG  |
| P02459 | 1444 | CTKHTGKWGKTM   |
| P02459 | 1447 | HTGKWGKTMIEYR  |
| P02459 | 1456 | IEYRSQKTSRLPI  |
| P04258 | 8    | YEAYDVKSGVAGG  |
| P04258 | 73   | AIGPSKDGESGR   |
| P04258 | 128  | PGAPGLKGENGV   |
| P04258 | 194  | PGSPGAKGEVGPA  |
| P04258 | 239  | DGSPGGKGMGPA   |
| P04258 | 280  | AAGEPGKNGAKGD  |
| P04258 | 284  | PGKNGAKGDPGPR  |
| P04258 | 305  | PGIAGPKGEDGKD  |

---

---

|        |     |                |
|--------|-----|----------------|
| P04258 | 310 | PKGEDGKDGSPPGE |
| P04258 | 347 | NGLPGEKGP PGDR |
| P04258 | 394 | GPGSNGKPGPPGS  |
| P04258 | 428 | MGFPGPKGNDGAP  |
| P04258 | 436 | NDGAPGKNGERGG  |
| P04258 | 454 | PQGPAGKNGETGP  |
| P04258 | 473 | TGPPSGDKGDTGPP |
| P04258 | 499 | PPGENGKPGEPGP  |
| P04258 | 506 | PGEPPGPKGEAGAP |
| P04258 | 518 | PGIPGGKGD SGAP |
| P04258 | 551 | PGPEGGKGAAGPP  |
| P04258 | 584 | PGGP GPKGDKGEP |
| P04258 | 587 | PGPKGDKGEPGSS  |
| P04258 | 601 | VDGAPGKDGPRGP  |
| P04258 | 623 | AGQPGDKGESGAP  |
| P04258 | 668 | NGEPGAKGERGAP  |
| P04258 | 677 | RGAPGEKGE GGPP |
| P04258 | 704 | PGPQGVKGERGSP  |
| P04258 | 745 | SSGAPGKDGPPGP  |
| P04258 | 767 | PGISGPKGDSGPP  |
| P04258 | 821 | PGPQGIKGENGKP  |
| P04258 | 826 | IKGENGKPGPSGQ  |
| P04258 | 875 | DGAPGAKGDRGEN  |
| P04258 | 994 | PSGPPGKDGASGH  |
| P12108 | 51  | DGIDGDKGSPGAP  |
| P12108 | 63  | PGSPGAKGEPGAP  |
| P12108 | 77  | PDGPPGKPGLDGL  |
| P12108 | 87  | DGLTGAKGSRGPW  |
| P12108 | 99  | WGGQGLKGQPGLP  |
| P12108 | 137 | IGVPPGPKGDPPGD |
| P12108 | 154 | PPGPPGKPGPPGH  |
| P12108 | 190 | QGLQGLKGHRGRP  |
| P12108 | 207 | EPGQQGKQGPKGD  |
| P12108 | 211 | QKGKQGPKG DVGV |
| P12108 | 241 | PGMAGPKGETGPA  |
| P12108 | 250 | TGPAGYKGMVGTI  |
| P12108 | 268 | PGREGPKGPPGDP  |
| P12108 | 277 | PGDPGEKGELGGR  |
| P12108 | 295 | QGDIGPKGDMGLP  |
| P12108 | 306 | LPGIDGKDGTPI   |
| P12108 | 316 | PGIPGVKGTAGQP  |
| P12108 | 343 | PGQPGSKGGPGDK  |
| P12108 | 349 | KGGPGDKGEVGAR  |
| P12108 | 385 | AGVPGLKGDRGER  |
| P12108 | 406 | AGQSGPKGEQGPP  |
| P12108 | 424 | QGLPGVKGDKGSP  |
| P12108 | 427 | PGVKGDKGSPGKT  |
| P12108 | 432 | DKGSPGKTGP KGS |
| P12108 | 436 | PGKTGPKGSTGDP  |
| P12108 | 451 | HGLAGVKGEKGES  |
| P12108 | 454 | AGVKGEKGESGEP  |
| P12108 | 463 | SGEPGPKGQQGIQ  |
| P12108 | 529 | I IDVVLKMMQEQL |
| P12108 | 543 | EVAVSAKRAALGG  |
| P12108 | 595 | IGNIGPKGKRGEK  |
| P12108 | 597 | NIGPKGKRGEKGE  |
| P12108 | 601 | KGKRGEKGERGDT  |
| P12108 | 634 | GHALAGKDG ERGP |
| Q05707 | 7   | MKIFQRKMRYWLL  |

---

---

|        |      |                                         |
|--------|------|-----------------------------------------|
| Q05707 | 51   | SIQISW <b>K</b> APRGKF                  |
| Q05707 | 56   | WKAPRG <b>K</b> FGGYKL                  |
| Q05707 | 61   | GKFGGY <b>K</b> LLVTPT                  |
| Q05707 | 71   | TPTSGG <b>K</b> TNQLNL                  |
| Q05707 | 83   | LQNTAT <b>K</b> AI IQGL                 |
| Q05707 | 104  | QIIAYN <b>K</b> DKESKP                  |
| Q05707 | 106  | IAYN <b>K</b> DKESKPAQ                  |
| Q05707 | 109  | N <b>K</b> DKES <b>K</b> PAQGQF         |
| Q05707 | 118  | QGQFRI <b>K</b> DLEKRR                  |
| Q05707 | 122  | RI <b>K</b> DLE <b>K</b> RKDPKP         |
| Q05707 | 124  | KDLE <b>K</b> R <b>K</b> DPKPRV         |
| Q05707 | 127  | E <b>K</b> RKDP <b>K</b> PRVKVV         |
| Q05707 | 131  | DPKPRV <b>K</b> VVDRGN                  |
| Q05707 | 148  | SSPEEV <b>K</b> FVCQTP                  |
| Q05707 | 194  | FDVGSE <b>K</b> TRIGLA                  |
| Q05707 | 218  | LNAFST <b>K</b> DEVIEA                  |
| Q05707 | 231  | VRNL <b>P</b> Y <b>K</b> GGNTLT         |
| Q05707 | 250  | IFENSF <b>K</b> PEAGSR                  |
| Q05707 | 261  | SRTGV <b>S</b> <b>K</b> IGILIT          |
| Q05707 | 270  | ILITDG <b>K</b> SQDDII                  |
| Q05707 | 295  | LFAIGV <b>K</b> NADVNE                  |
| Q05707 | 346  | EQDREI <b>K</b> ASAHAI                  |
| Q05707 | 382  | APGNVE <b>K</b> YRVVYY                  |
| Q05707 | 394  | YPTRGG <b>K</b> PDEVVV                  |
| Q05707 | 410  | VSSTVL <b>K</b> NLM <b>S</b> LT         |
| Q05707 | 462  | ENSMRV <b>K</b> WD <b>A</b> VP <b>G</b> |
| Q05707 | 488  | GLAGDE <b>K</b> EMKIGE                  |
| Q05707 | 491  | GDE <b>K</b> EM <b>K</b> IGETHT         |
| Q05707 | 591  | ITTFPL <b>K</b> GLT <b>P</b> LT         |
| Q05707 | 655  | ADEGLH <b>K</b> LMWIPV                  |
| Q05707 | 665  | IPVYGG <b>K</b> TEEVVL                  |
| Q05707 | 672  | TEEVVL <b>K</b> EEQDSH                  |
| Q05707 | 754  | TSSLRV <b>K</b> WDISDS                  |
| Q05707 | 796  | QNNLLL <b>K</b> P <b>L</b> LPDT         |
| Q05707 | 805  | LPDTEY <b>K</b> VT <b>V</b> TPI         |
| Q05707 | 825  | SVSAPG <b>K</b> TL <b>P</b> SSG         |
| Q05707 | 857  | PPSSPV <b>K</b> GYRIVY                  |
| Q05707 | 864  | GYRIVY <b>K</b> PVSVPG                  |
| Q05707 | 898  | GMDYNV <b>K</b> IFASQA                  |
| Q05707 | 916  | ALTGMV <b>K</b> TL <b>F</b> LG <b>V</b> |
| Q05707 | 928  | VTNLQ <b>A</b> KHVEMTS                  |
| Q05707 | 960  | SLQDRQ <b>K</b> QESTVG                  |
| Q05707 | 984  | QPDSEY <b>K</b> ISVYTK                  |
| Q05707 | 990  | KISVY <b>T</b> <b>K</b> LQEIEG          |
| Q05707 | 1004 | SVSIME <b>K</b> TQSLPT                  |
| Q05707 | 1023 | PTIPPA <b>K</b> EVCKAA                  |
| Q05707 | 1027 | PAKEVC <b>K</b> AAKADL                  |
| Q05707 | 1030 | EVCKAA <b>K</b> ADLVFM                  |
| Q05707 | 1050 | GDENFN <b>K</b> IISFLY                  |
| Q05707 | 1064 | TVGALN <b>K</b> IGTDGT                  |
| Q05707 | 1086 | DPRT <b>E</b> F <b>K</b> LNAYKT         |
| Q05707 | 1091 | FKLNAY <b>K</b> TKETLL                  |
| Q05707 | 1093 | LNAYKT <b>K</b> ETLLDA                  |
| Q05707 | 1101 | TLLDAI <b>K</b> HISYKG                  |
| Q05707 | 1106 | IKHISY <b>K</b> GGNTKT                  |
| Q05707 | 1111 | YKGGNT <b>K</b> TGKA <b>I</b> K         |
| Q05707 | 1114 | GNTKTG <b>K</b> AIKYVR                  |
| Q05707 | 1117 | KTGKA <b>I</b> KYVRDTL                  |
| Q05707 | 1136 | TRRGIP <b>K</b> VIVVIT                  |

---



---

|        |      |                        |
|--------|------|------------------------|
| Q05707 | 1152 | SQDDVN <b>K</b> ISREMQ |
| Q05707 | 1183 | LVSIGS <b>K</b> PSARHV |
| Q05707 | 1199 | DDFDAF <b>K</b> KIEDEL |
| Q05707 | 1200 | DFDAF <b>K</b> KIEDELI |
| Q05707 | 1222 | TCPVVH <b>K</b> DGIDLA |
| Q05707 | 1231 | IDLAGF <b>K</b> MMEMFG |
| Q05707 | 1241 | MFGLVE <b>K</b> DFSSVE |
| Q05707 | 1266 | PCYQLH <b>K</b> DALVSQ |
| Q05707 | 1311 | LWEILN <b>K</b> NSDPLV |
| Q05707 | 1326 | ILDNGG <b>K</b> TLTYFN |
| Q05707 | 1351 | EGPEIR <b>K</b> IFYGSF |
| Q05707 | 1359 | FYGSFH <b>K</b> LHIVVS |
| Q05707 | 1370 | VSETLV <b>K</b> VVIDCK |
| Q05707 | 1376 | KVVIDC <b>K</b> QVGEKA |
| Q05707 | 1381 | CKQVGE <b>K</b> AMNASA |
| Q05707 | 1399 | GVEVLG <b>K</b> MVRSRG |
| Q05707 | 1431 | SWANTD <b>K</b> CCELPG |
| Q05707 | 1558 | QRGLPG <b>K</b> DGSSGP |
| P23805 | 29   | MTTFSQ <b>K</b> ILANAC |
| P23805 | 122  | REGPSG <b>K</b> QGSMGP |
| P23805 | 222  | AEVNAL <b>K</b> QRVTIL |
| P23805 | 243  | NAFSQY <b>K</b> KAVLFP |
| P23805 | 244  | AFSQY <b>K</b> KAVLFPD |
| P23805 | 257  | GQAVGE <b>K</b> IFKTAG |
| P23805 | 260  | VGEKIF <b>K</b> TAGAVK |
| P23805 | 266  | KTAGAV <b>K</b> SYSDAE |
| P23805 | 279  | QLCREA <b>K</b> GQLASP |
| P23805 | 303  | MVRAQE <b>K</b> NAYLSM |
| P23805 | 355  | EIFPDG <b>K</b> WNDVPC |
| P23805 | 363  | NDVPCS <b>K</b> QLLVIC |
| Q9Y383 | 29   | TTRQRI <b>K</b> FSDDR  |
| Q9Y383 | 37   | SDDRV <b>K</b> SHLLNC  |
| Q9Y383 | 61   | DLGECL <b>K</b> VHDLAL |
| Q9Y383 | 76   | DYEIAS <b>K</b> EQDFFF |
| Q9Y383 | 105  | RRTEVA <b>K</b> KRLAET |
| Q9Y383 | 106  | RTEVA <b>K</b> KRLAETQ |
| Q9Y383 | 122  | SAEVA <b>K</b> AERVHE  |
| Q9Y383 | 135  | LNEEIG <b>K</b> LLAKVE |
| Q9Y383 | 139  | IGKLLA <b>K</b> VEQLGA |
| Q9Y383 | 154  | NVEESQ <b>K</b> VMDEVE |
| Q9Y383 | 161  | VMDEVE <b>K</b> KARAKR |
| Q9Y383 | 165  | VEKAR <b>K</b> KREAE   |
| Q9Y383 | 166  | EKAR <b>K</b> KREAEV   |
| Q9Y383 | 186  | SSFQQ <b>K</b> LRVCEV  |
| Q9Y383 | 213  | ADHFGG <b>K</b> LHLGFI |
| Q9Y383 | 224  | FIEIRE <b>K</b> LEELKR |
| Q9Y383 | 229  | EKLEEL <b>K</b> RVVAEK |
| Q9Y383 | 235  | KRVVAE <b>K</b> QEKRNQ |
| Q9Y383 | 238  | VAEKQ <b>K</b> ERNQERL |
| Q9Y383 | 245  | RNQERL <b>K</b> RREERE |
| Q9Y383 | 257  | EREERE <b>K</b> LRRSRS |
| Q9Y383 | 289  | SMSRER <b>K</b> RRTRSK |
| Q9Y383 | 295  | KRRTR <b>K</b> SREKRH  |
| Q9Y383 | 299  | RSKSRE <b>K</b> RHRHRS |
| Q9Y383 | 332  | RSRERS <b>K</b> RSSKE  |
| Q9Y383 | 337  | SKRRSS <b>K</b> ERFRDQ |
| Q9Y383 | 365  | PRDRDR <b>K</b> DKRSY  |
| Q9Y383 | 367  | DRDR <b>K</b> DKRSYES  |
| Q9Y383 | 368  | RDR <b>K</b> DKRSYESA  |

---



---

|        |     |                |
|--------|-----|----------------|
| P30943 | 44  | AMDKSAKAPVITI  |
| P30943 | 61  | GCSRAPKEYTGAK  |
| P30943 | 67  | KEYTGAKAGGKDD  |
| P30943 | 71  | GAKAGGKDDEMMV  |
| P30943 | 78  | DDEMMVKAQSVKI  |
| P30943 | 83  | VKAQSVKIEVSTG  |
| Q00433 | 82  | KESTGGKAGGQDD  |
| Q00433 | 93  | DDEMMVKVASTKV  |
| Q00433 | 98  | VKVASTKVTVSES  |
| Q00433 | 108 | SESDAAKKLQEFI  |
| Q00433 | 109 | ESDAAKKLQEFIT  |
| Q00433 | 118 | EFITFEKGIDGPF  |
| P01170 | 61  | LSQEWSKRAVEEL  |
| P01170 | 111 | LPPRERKAGCKNF  |
| P01170 | 115 | ERKAGCKNFYWKG  |
| P26368 | 20  | NKQERDKENRHRK  |
| P26368 | 26  | KENRHRKRSHSR   |
| P26368 | 38  | SRSRDRKRRSR    |
| P26368 | 63  | DRRRRSKPLTRGA  |
| P26368 | 70  | PLTRGAKEEHGGL  |
| P26368 | 84  | RSPRHEKKKKVRK  |
| P26368 | 85  | SPRHEKKKKVRKY  |
| P26368 | 86  | PRHEKKKKVRKYW  |
| P26368 | 87  | RHEKKKKVRKYWD  |
| P26368 | 90  | KKKKVRKYWDVPP  |
| P26368 | 108 | ITPMQYKAMQAAG  |
| P26368 | 195 | VQINQDKNFAFLE  |
| P26368 | 225 | FQGQSLKIRRPD   |
| P26368 | 260 | VPDSAHLKLFIGGL |
| P26368 | 286 | TSFGPLKAFNLVK  |
| P26368 | 292 | KAFNLVKDSATGL  |
| P26368 | 300 | SATGLSKGYAFCE  |
| P26368 | 328 | GMQLGDKKLLVQR  |
| P26368 | 329 | MQLGDKKLLVQRA  |
| P26368 | 340 | RASVGAKNATLVS  |
| P26368 | 408 | VRDECSKYGLVKS  |
| P26368 | 413 | SKYGLVKSIEIPR  |
| P26368 | 431 | EVPGCGKIFVEFT  |
| P26368 | 444 | SVFDCQKAMQGLT  |
| P26368 | 453 | QGLTGRKFANRVV  |
| P26368 | 462 | NRVVVTKYCDPDS  |
| P02745 | 32  | CRAPDGKKGEAGR  |
| P02745 | 81  | PSGNPGKVGYPGP  |
| P02745 | 110 | GSPGNIKDQPRPA  |
| P02745 | 195 | FCDTTNKGLFQVV  |
| P02745 | 219 | DQVWVEKDPKKGH  |
| P02745 | 222 | WVEKDPKKGHIYQ  |
| P02745 | 223 | VEKDPKKGHIYQG  |
| P02747 | 14  | LPHLGLKLLLLLL  |
| P02747 | 47  | LPGAPGKDGVDGL  |
| P02747 | 72  | PGIRGPKGQKGEP  |
| P02747 | 86  | LPGHGPKNGPMGP  |
| P02747 | 115 | GEEGRYKQKFQSV  |
| P02747 | 117 | EGRYKQKFQSVFT  |
| P02747 | 157 | YDTSTGKFTCKVP  |
| P02747 | 161 | TGKFTCKVPGLYY  |
| P02747 | 188 | LYRSGVKVVTFCG  |
| P02747 | 198 | FCGHTSKTNQVNS  |
| P04142 | 5   | @MNFARKILSFVF  |

---

---

|        |      |                         |
|--------|------|-------------------------|
| P04142 | 29   | APEPRW <b>K</b> IFKKIE  |
| P04142 | 32   | PRWKIF <b>K</b> KIEKMG  |
| P04142 | 33   | RWKIF <b>K</b> KIEKMGR  |
| P04142 | 36   | IFKKIE <b>K</b> MGRNIR  |
| P04142 | 59   | EVLGSA <b>K</b> AIGK@@  |
| P83414 | 6    | @KWKF <b>K</b> KIEKVG   |
| P83414 | 7    | KWKVF <b>K</b> KIEKVGR  |
| P02453 | 54   | HDRDVW <b>K</b> PVPCQI  |
| P02453 | 79   | VICDEL <b>K</b> DCPNAK  |
| P02453 | 85   | KDCPNA <b>K</b> VPTDEC  |
| P02453 | 170  | SYGYDE <b>K</b> STGISV  |
| P02453 | 429  | SGPPGP <b>K</b> GNSGEP  |
| P02453 | 504  | DGVAGP <b>K</b> GPAGER  |
| P02453 | 750  | RGDAGP <b>K</b> GADGAP  |
| P02453 | 861  | VGAPGP <b>K</b> GARGSA  |
| P02453 | 1107 | QGDRGI <b>K</b> GHARGFS |
| P02453 | 1309 | QPSVAQ <b>K</b> NWYISK  |
| P02452 | 67   | CVCDNG <b>K</b> VLCDDV  |
| P02452 | 79   | VICDET <b>K</b> NCPGAE  |
| P02452 | 170  | SYGYDE <b>K</b> STGGIS  |
| P02452 | 1316 | KNWYIS <b>K</b> NPDKDR  |
| P02452 | 1319 | YISKNP <b>K</b> DKRHWV  |
| P02454 | 45   | PNGETW <b>K</b> PDVCLI  |
| P02454 | 67   | CDGVLC <b>K</b> EDLDCP  |
| P02454 | 77   | DCPNPQ <b>K</b> REGECC  |
| P02454 | 583  | TAGEPG <b>K</b> AGERGV  |
| P02454 | 824  | PGDTGV <b>K</b> G DAGPP |
| P02454 | 892  | PPGPVG <b>K</b> EGGKGP  |
| P02454 | 896  | VGKEGG <b>K</b> GPRGET  |
| P02454 | 1374 | QQTGNL <b>K</b> KSLLLQ  |
| P02461 | 7    | MMSFVQ <b>K</b> GSWLLL  |
| P02461 | 108  | QGPQGP <b>K</b> GDPGPP  |
| P02461 | 161  | YDSYDV <b>K</b> SGVAVG  |
| P02461 | 229  | PSGPAG <b>K</b> DGESGR  |
| P02461 | 251  | PGPPGI <b>K</b> GPAGIP  |
| P02461 | 275  | DGRNGE <b>K</b> GETGAP  |
| P02461 | 461  | PGVPGA <b>K</b> GEDGKD  |
| P02461 | 503  | NGIPGE <b>K</b> GPAGER  |
| P02461 | 923  | PGVSGP <b>K</b> G DAGQP |
| P02461 | 932  | AGQPGE <b>K</b> GSPGAQ  |
| P02461 | 982  | VKGESG <b>K</b> PGANGL  |
| P02461 | 1212 | AGIGGE <b>K</b> AGGFAP  |
| P02461 | 1228 | DEPMDF <b>K</b> INTDEI  |
| P02461 | 1239 | EIMTSL <b>K</b> SVNGQI  |
| P02461 | 1256 | SPDGSR <b>K</b> NPARNC  |
| P02461 | 1266 | RNCRDL <b>K</b> FCHPEL  |
| P02461 | 1273 | FCHPEL <b>K</b> SGEYWV  |
| P02461 | 1286 | DPNQGC <b>K</b> LD AIKV |
| P02461 | 1313 | PLNVPR <b>K</b> HWWTDS  |
| P02461 | 1323 | TDSSAE <b>K</b> KHVWFG  |
| P02461 | 1324 | DSSAE <b>K</b> KHVWFGE  |
| P02461 | 1387 | QASGNV <b>K</b> KALKLM  |
| P02461 | 1388 | ASGNV <b>K</b> KALKLMG  |
| P02461 | 1391 | NVKKAL <b>K</b> LMGSNE  |
| P02461 | 1401 | SNEGEF <b>K</b> AEGNSK  |
| P02461 | 1407 | KAEGNS <b>K</b> FTYTVL  |
| P02461 | 1419 | LEDGCT <b>K</b> HTEWS   |
| P02461 | 1426 | HTGEWS <b>K</b> TVFEYR  |
| P02461 | 1435 | FEYRTR <b>K</b> AVRLPI  |

---

---

|        |      |                         |
|--------|------|-------------------------|
| P20908 | 8    | DVHTRW <b>K</b> ARSALR  |
| P20908 | 44   | QPADLL <b>K</b> VLD FHN |
| P20908 | 57   | LPDGIT <b>K</b> TTGFCA  |
| P20908 | 69   | ATRRSS <b>K</b> GPDVAY  |
| P20908 | 79   | VAYRVT <b>K</b> DAQLSA  |
| P20908 | 88   | QLSAPT <b>K</b> QLYPAS  |
| P20908 | 107  | SILTTV <b>K</b> AKKGSQ  |
| P20908 | 109  | LTTVK <b>A</b> KKGSQAF  |
| P20908 | 110  | TTVK <b>A</b> KKGSQAF   |
| P20908 | 146  | YEDHTG <b>K</b> PGPEDY  |
| P20908 | 164  | INLSDG <b>K</b> WHRIAL  |
| P20908 | 174  | IALSVH <b>K</b> KNVTLI  |
| P20908 | 175  | ALSVH <b>K</b> KNVTLIL  |
| P20908 | 184  | TLILD <b>C</b> KKKTTKF  |
| P20908 | 185  | LILD <b>C</b> KKKTTKFL  |
| P20908 | 186  | ILD <b>C</b> KKKTTKFLD  |
| P20908 | 189  | CKKKTT <b>K</b> FLDRSD  |
| P20908 | 288  | DPEDLG <b>K</b> EPTPSK  |
| P20908 | 294  | KEPTPS <b>K</b> KPVEAA  |
| P20908 | 295  | EPTPS <b>K</b> KPVEAAK  |
| P20908 | 301  | KPVEAA <b>K</b> ETTEVP  |
| P20908 | 329  | TSEGAG <b>K</b> EEDVGI  |
| P20908 | 452  | GGPRGE <b>K</b> GQKGEP  |
| P20908 | 455  | RGEKG <b>Q</b> KGEPAI I |
| P20908 | 535  | GGDAGS <b>K</b> GPMVSA  |
| P20908 | 582  | PGSGGL <b>K</b> GEPGDV  |
| P20908 | 605  | PPGPAG <b>K</b> PGRRGR  |
| P20908 | 687  | RGLLGP <b>K</b> GPPGPP  |
| P20908 | 749  | EKGPLG <b>K</b> PGLPGM  |
| P20908 | 767  | PPGHPG <b>K</b> EGPPGE  |
| P20908 | 825  | KGDMGI <b>K</b> GDRGEI  |
| P20908 | 866  | PPGEKG <b>L</b> GV PGL  |
| P20908 | 905  | GRGTPG <b>K</b> PGPRGQ  |
| P20908 | 929  | PRGITG <b>K</b> PGPKGN  |
| P20908 | 933  | TGKPGP <b>K</b> GNSGGD  |
| P20908 | 963  | TGFPGP <b>K</b> GPPGPP  |
| P20908 | 989  | ETGFQ <b>G</b> KTGPPGP  |
| P20908 | 1034 | LPGLAG <b>K</b> EGTKGD  |
| P20908 | 1038 | AGKEGT <b>K</b> GDPGPA  |
| P20908 | 1049 | PAGLP <b>G</b> KDGPPGL  |
| P20908 | 1074 | VGALGL <b>K</b> GNEGPP  |
| P20908 | 1119 | PGPAGE <b>K</b> GAPGEK  |
| P20908 | 1125 | KGAPGE <b>K</b> GPPQGPA |
| P20908 | 1158 | PGEDGD <b>K</b> GEIGEP  |
| P20908 | 1167 | IGEPG <b>Q</b> KGSKGDK  |
| P20908 | 1170 | PGQKGS <b>K</b> GDKGEQ  |
| P20908 | 1173 | KGSKGD <b>K</b> GEGQPP  |
| P20908 | 1212 | QGLFG <b>Q</b> KGDEGPR  |
| P20908 | 1239 | PGPPGE <b>K</b> GETGDV  |
| P20908 | 1305 | GGPPGP <b>K</b> GERGEK  |
| P20908 | 1311 | KGERGE <b>K</b> GESGPS  |
| P20908 | 1335 | PGDDGP <b>K</b> GSPGPV  |
| P20908 | 1365 | DGPPGD <b>K</b> GDDGEP  |
| P20908 | 1407 | EGRQGE <b>K</b> GAKGEA  |
| P20908 | 1410 | QGEKG <b>A</b> KGEAGLE  |
| P20908 | 1421 | LEGPPG <b>K</b> TGP IGP |
| P20908 | 1433 | PQGAPG <b>K</b> PGPDGL  |
| P20908 | 1473 | PGLPGL <b>K</b> GDSGPK  |
| P20908 | 1479 | KGDSGP <b>K</b> GEGKHP  |

---

---

|        |      |                |
|--------|------|----------------|
| P20908 | 1482 | SGPKGEKGHPGLI  |
| P20908 | 1500 | PGEQGEKGDRGLP  |
| P20908 | 1515 | QGSSGPKEQGKIT  |
| P20908 | 1542 | PGPPGPKGAKGSS  |
| P20908 | 1545 | PGPKGAKGSSGPT  |
| P20908 | 1554 | SGPTGPKGEAGHP  |
| P20908 | 1619 | GSLNSLKEIEIQM  |
| P20908 | 1626 | LEIEQMKRPLGTQ  |
| P20908 | 1640 | NPARTCKDLQLCH  |
| P20908 | 1668 | CSRDSFKVYCNFT  |
| P20908 | 1685 | TCVFPDKKSEGAR  |
| P20908 | 1686 | CVFPDKKSEGARI  |
| P20908 | 1697 | RITSWPKENPGSW  |
| P20908 | 1708 | SWFSEFKRGKLLS  |
| P20908 | 1711 | SEFKRGKLLSYVD  |
| P20908 | 1762 | ATGSYDKALRFLG  |
| P20908 | 1792 | VDGCATKKGYQKT  |
| P20908 | 1793 | DGCATKKGYQKTV  |
| P20908 | 1797 | TKKGYQKTVLEID  |
| P20908 | 1806 | LEIDTPKVEQVPI  |
| P20908 | 1826 | FGEASQKFGFEVG  |
| P12111 | 33   | QQQADVKNGAAD   |
| P12111 | 67   | FLYDVVKSLAVGE  |
| P12111 | 99   | LNTYRTKQEVLSH  |
| P12111 | 120  | GTNQTGKLEYIM   |
| P12111 | 132  | MQSHLTKAAGSRA  |
| P12111 | 155  | LTDGHSKDGLALP  |
| P12111 | 166  | LPSAELKSADVNV  |
| P12111 | 186  | ADEGALKEIASEP  |
| P12111 | 233  | GDTETLKDITAQD  |
| P12111 | 271  | LVNLLEKLPIGTQ  |
| P12111 | 302  | LDTYSTKAQVLGA  |
| P12111 | 310  | QVLGAVKALGFAG  |
| P12111 | 370  | YGVVALKQASVFS  |
| P12111 | 414  | FGDLQEKL LPYIV |
| P12111 | 430  | QRHIVLKPPTIVT  |
| P12111 | 443  | QVIEVNKRDIVFL  |
| P12111 | 470  | IRDFIAKVIQRLE  |
| P12111 | 505  | FNTHPTKREVITA  |
| P12111 | 514  | VITAVRKMKPLDG  |
| P12111 | 516  | TAVRKMKPLDGSA  |
| P12111 | 551  | AAEGIPKLLVLIT  |
| P12111 | 560  | VLITGGKSLDEIS  |
| P12111 | 573  | QPAQELKRSSIMA  |
| P12111 | 585  | AFAIGNKGADQAE  |
| P12111 | 637  | PEVHSNKRDIIFL  |
| P12111 | 652  | GSANVGKTNFPYV  |
| P12111 | 699  | LNTYQTKSDILGH  |
| P12111 | 783  | GASQANKAELEQI  |
| P12111 | 835  | LAQPESKRDILFL  |
| P12111 | 861  | VRDFLYKIIDELN  |
| P12111 | 869  | IDELNVKPEGTRI  |
| P12111 | 885  | QYSDDVKVESRFD  |
| P12111 | 896  | FDEHQS KPEILNL |
| P12111 | 904  | EILNLVKRMKIKT  |
| P12111 | 907  | NLVKRMKIKTGKA  |
| P12111 | 909  | VKRMKIKTGKALN  |
| P12111 | 912  | MKIKTGKALNLGY  |
| P12111 | 930  | QRYIFVKSAGSRI  |

---

---

|        |      |                |
|--------|------|----------------|
| P12111 | 964  | GPASNLKQSGVVP  |
| P12111 | 976  | PFIFQAKNADPAE  |
| P12111 | 1001 | AAESLPKIGDLHP  |
| P12111 | 1014 | QIVNLLKSVHNGA  |
| P12111 | 1028 | APVSGEKDVFLL   |
| P12111 | 1048 | SGFPLLKEFVQRV  |
| P12111 | 1088 | LNSYMNKQDVVNA  |
| P12111 | 1156 | NPSVVVKRGGAVP  |
| P12111 | 1231 | SPGVGGKRDVVFL  |
| P12111 | 1281 | QFSDDPKVEFLLN  |
| P12111 | 1292 | LNAHSSKDEVQNA  |
| P12111 | 1305 | VQRLRPKGGRRQIN |
| P12111 | 1325 | VSRNIFKRPLGSR  |
| P12111 | 1347 | VLISSGKSDDEV   |
| P12111 | 1360 | DPAVELKQFGVAP  |
| P12111 | 1380 | DQEELVKISLSPE  |
| P12111 | 1403 | LPSLEQKLLTPIT  |
| P12111 | 1418 | TSEQIQKLLASTR  |
| P12111 | 1472 | LNIGPSKVRVGVV  |
| P12111 | 1491 | FPEFYLKTYRSQA  |
| P12111 | 1518 | SPLNTGKALEFVA  |
| P12111 | 1530 | ARNLFVKSAGSRI  |
| P12111 | 1551 | VLVLGGKSQDDVS  |
| P12111 | 1635 | PPSRPEKKKADIV  |
| P12111 | 1636 | PSRPEKKKADIVF  |
| P12111 | 1637 | SRPEKKKADIVFL  |
| P12111 | 1694 | TDEFFLKDFSTKR  |
| P12111 | 1699 | LKDFSTKRQIIDA  |
| P12111 | 1708 | IIDAINKVVKGG   |
| P12111 | 1712 | INKVVYKGRHAN   |
| P12111 | 1720 | GRHANTKVGLEHL  |
| P12111 | 1754 | FVITGGKSVEDAQ  |
| P12111 | 1772 | LTQRGVKVFAVG   |
| P12111 | 1788 | DSEEVGKIASNSA  |
| P12111 | 1833 | GVTDAAKACNLDV  |
| P12111 | 1856 | NVFVAQKGFESKV  |
| P12111 | 1861 | QKGFESKVDAILN  |
| P12111 | 1913 | QPEMLEKFRNMRS  |
| P12111 | 1931 | LTEDTLKVYLNKF  |
| P12111 | 1936 | LKVYLNKFRQSSP  |
| P12111 | 1946 | SSPDSVKVVIHFT  |
| P12111 | 2027 | LDNIAEKACCGVP  |
| P12111 | 2035 | CCGVPCKCSGQRG  |
| P12111 | 2052 | IGSIGPKGIPGED  |
| P12111 | 2094 | PGQRGVKGSRGFP  |
| P12111 | 2121 | DGEDGDKGLPGSS  |
| P12111 | 2130 | PGSSGEKGNPGR   |
| P12111 | 2139 | PGRRGDKGPRGEK  |
| P12111 | 2170 | SQERGPKGETGDL  |
| P12111 | 2196 | GPGETGKNGGFGR  |
| P12111 | 2272 | TGPLGRKGEPGEP  |
| P12111 | 2281 | PGEPGPKGIGNR   |
| P12111 | 2309 | SEGRRGKKGGERGF |
| P12111 | 2310 | EGRRGKKGGERGFP |
| P12111 | 2355 | PGIVGQKGDPGYP  |
| P12111 | 2367 | PGPAGPKGNRGDS  |
| P12111 | 2384 | ALIQSIKDKCPCC  |
| P12111 | 2386 | IQSIKDKCPCCYG  |
| P12111 | 2464 | IRFADSKRKSVLL  |

---

---

|        |      |                                         |
|--------|------|-----------------------------------------|
| P12111 | 2466 | FADSKRKS <del>V</del> LLDK              |
| P12111 | 2472 | KSVLLD <del>K</del> IKNLQV              |
| P12111 | 2474 | VLLD <del>K</del> IKNLQVAL              |
| P12111 | 2483 | QVALTSK <del>Q</del> QSLET              |
| P12111 | 2500 | VARNTFK <del>R</del> VRNGF              |
| P12111 | 2510 | NGFLMRK <del>V</del> AVFFS              |
| P12111 | 2532 | LREAVLKLSDAGI                           |
| P12111 | 2639 | FQFNEMK <del>K</del> YIAYL              |
| P12111 | 2640 | QFNEMK <del>K</del> YIAYLV              |
| P12111 | 2656 | DMSPDPK <del>A</del> SQHFA              |
| P12111 | 2684 | ASMP <del>P</del> VKVEFSLT              |
| P12111 | 2695 | LTDYGS <del>K</del> EKLVD <del>F</del>  |
| P12111 | 2697 | DYGSKE <del>K</del> LVD <del>F</del> LS |
| P12111 | 2737 | PNPRDL <del>K</del> IVVLML              |
| P12111 | 2763 | RVILQA <del>K</del> CKGYFF              |
| P12111 | 2765 | ILQA <del>K</del> CKGYFFV <del>V</del>  |
| P12111 | 2777 | VLGIGR <del>K</del> VNIKEV              |
| P12111 | 2781 | GRKVNI <del>K</del> EVYTFA              |
| P12111 | 2796 | PNDVFF <del>K</del> LVDKST              |
| P12111 | 2800 | FFKLVD <del>K</del> STELNE              |
| P12111 | 2834 | LSPDIR <del>K</del> QCDWFQ              |
| P12111 | 2846 | QGDQPT <del>K</del> NLVKFG              |
| P12111 | 2850 | PTKNLV <del>K</del> FGHKQV              |
| P12111 | 2854 | LVKFGH <del>K</del> QVNVPN              |
| P12111 | 2875 | NPVTTT <del>K</del> PVTTTK              |
| P12111 | 2888 | PVTTTT <del>K</del> PVTTTT              |
| P12111 | 2895 | PVTTTT <del>K</del> PVTTIIN             |
| P12111 | 2906 | INQPSV <del>K</del> PAAAKP              |
| P12111 | 2911 | VKPAAAK <del>P</del> APAKP              |
| P12111 | 2916 | AKPAPAK <del>P</del> VAAKP              |
| P12111 | 2921 | AKPVAAK <del>P</del> VATKM              |
| P12111 | 2926 | AKPVAT <del>K</del> MATVRP              |
| P12111 | 2937 | RPPVAV <del>K</del> PATAAK              |
| P12111 | 2943 | KPATAAK <del>P</del> VAAKP              |
| P12111 | 2948 | AKPVAAK <del>P</del> AAVRP              |
| P12111 | 2961 | PAAAAAK <del>P</del> VATKP              |
| P12111 | 2966 | AKPVAT <del>K</del> PEVPRP              |
| P12111 | 2976 | PRPQAAK <del>P</del> AATKP              |
| P12111 | 2981 | AKPAAT <del>K</del> PATTKP              |
| P12111 | 2986 | TKPATT <del>K</del> PMVKMS              |
| P12111 | 2990 | TTKPMV <del>K</del> MSREVQ              |
| P12111 | 3006 | ITENSA <del>K</del> LHWERA              |
| P12111 | 3035 | DQSLVL <del>K</del> QNLTVT              |
| P12111 | 3077 | HGSFST <del>K</del> KSQPPP              |
| P12111 | 3078 | GSFST <del>K</del> KSQPPP               |
| P12111 | 3113 | TETDICK <del>L</del> PKDEG              |
| P12111 | 3116 | DICKLP <del>K</del> DEGT <del>C</del> R |
| P12111 | 3127 | CRDFIL <del>K</del> WYYDPN              |
| P12111 | 3135 | YYDPNT <del>K</del> SCARFW              |
| P12111 | 3151 | CGGNEN <del>K</del> FGSQKE              |
| P12111 | 3156 | NKFGSQ <del>K</del> ECEKVC              |
| P12111 | 3160 | SQKECE <del>K</del> VCA <del>P</del> VL |
| P12111 | 3168 | CAPVLAK <del>P</del> GVISV              |
| Q02388 | 113  | IRELSY <del>K</del> GGNTRT              |
| Q02388 | 142  | ARPGVP <del>K</del> VCILIT              |
| Q02388 | 151  | ILITDG <del>K</del> SQDLVD              |
| Q02388 | 164  | TAAQRL <del>K</del> GQGVKL              |
| Q02388 | 169  | LKGQGV <del>K</del> LFAVGI              |
| Q02388 | 176  | LFAVGI <del>K</del> NADPEE              |

---

---

|        |      |                 |
|--------|------|-----------------|
| Q02388 | 184  | ADPEELKRVASQP   |
| Q02388 | 263  | GPVTGYKVQYTPL   |
| Q02388 | 459  | GLEPPQKVVLPSD   |
| Q02388 | 727  | SAHGPEKSQLVSG   |
| Q02388 | 1253 | CPVYCPKGQKGEP   |
| Q02388 | 1256 | YCPKGQKGEPGEM   |
| Q02388 | 1295 | PGSATAKGERGFP   |
| Q02388 | 1325 | PGAPGLKGSPGLP   |
| Q02388 | 1346 | RGPRGPKGEPGAP   |
| Q02388 | 1367 | PGLPGRKGDPGPS   |
| Q02388 | 1399 | LPGTAMKGDKGDR   |
| Q02388 | 1402 | TAMKGDKGDRGER   |
| Q02388 | 1443 | PVGPPGKKGEEKGD  |
| Q02388 | 1444 | VGPPGKKGEEKGDS  |
| Q02388 | 1447 | PGKKGEKGDSEDG   |
| Q02388 | 1479 | PGAIGPKGDRGFP   |
| Q02388 | 1494 | LGEAGEKGERGPP   |
| Q02388 | 1518 | AGRPGA KGPEGPP  |
| Q02388 | 1533 | TGRQGEKGEPGRP   |
| Q02388 | 1553 | PAVAGPKGEKGDV   |
| Q02388 | 1556 | AGPKGEKGDVGPA   |
| Q02388 | 1588 | PGDPGPKGDPGDR   |
| Q02388 | 1615 | SGPPGEKGDPGRP   |
| Q02388 | 1639 | DGEVGEKGDEGPP   |
| Q02388 | 1653 | DPGLPGKAGERGL   |
| Q02388 | 1672 | RGPVGEKGDQGDP   |
| Q02388 | 1693 | PGSSGPKGDRGEP   |
| Q02388 | 1718 | GPGAREKGEPGDR   |
| Q02388 | 1733 | EGPRGPKGDPGLP   |
| Q02388 | 1769 | RGPAGEKGDRGPP   |
| Q02388 | 1786 | RSGLDGKPGAAGP   |
| Q02388 | 1801 | PNGAAGKAGDPGR   |
| Q02388 | 1831 | PPGLPGKPGEDGK   |
| Q02388 | 1837 | KPGEDGKPGLNGK   |
| Q02388 | 1843 | KPGLNGKNGE PGD  |
| Q02388 | 1856 | PGEDGRKGEEKGDS  |
| Q02388 | 1859 | DGRKGEKGD SGAS  |
| Q02388 | 1874 | EGRDGPKGERGAP   |
| Q02388 | 1912 | PGGTGPKGDRGET   |
| Q02388 | 1921 | RGETGSKG EQGLP  |
| Q02388 | 1952 | LETAGI KASALRE  |
| Q02388 | 1981 | ERRRGPKGDSGEQ   |
| Q02388 | 1992 | EQGPPGKEGP IGF  |
| Q02388 | 2005 | PGERGLKGDRGDP   |
| Q02388 | 2038 | LAGEPGKPGI PGL  |
| Q02388 | 2066 | RGERGEKGERGEQ   |
| Q02388 | 2093 | PGPPGPKVS VDEP  |
| Q02388 | 2113 | QGPPGLKGA KGEP  |
| Q02388 | 2116 | PGLKGA KGEPGSN  |
| Q02388 | 2128 | NGDQGPKGDRGVP   |
| Q02388 | 2137 | RGVPGI KGDRGEP  |
| Q02388 | 2166 | MAGPEGKPGLQGP   |
| Q02388 | 2206 | QGPSGLKGEPGET   |
| Q02388 | 2255 | QVGETGKPGAPGR   |
| Q02388 | 2267 | RDGASGKDGRGS    |
| Q02388 | 2289 | PGPVGPKGEPGPT   |
| Q02388 | 2309 | VGLPGA KGEEKGAP |
| Q02388 | 2312 | PGA KGEKGAPGGL  |
| Q02388 | 2329 | VGEPGA KGDRGLP  |

---



---

|        |      |               |
|--------|------|---------------|
| Q02388 | 2341 | PGPRGEKGEAGRA |
| Q02388 | 2359 | PGEDGQKGAPGPK |
| Q02388 | 2365 | KGAPGPKGFKGDP |
| Q02388 | 2368 | PGPKGFKGDPGVG |
| Q02388 | 2388 | PGPPGVKGDGLLP |
| Q02388 | 2457 | PGASGLKGDKGDP |
| Q02388 | 2460 | SGLKGDKGDPGVG |
| Q02388 | 2507 | RGERGEKGDVGSA |
| Q02388 | 2516 | VGSAGLKGDKGDS |
| Q02388 | 2519 | AGLKGDKGDSAVI |
| Q02388 | 2535 | PGPRGAKGDMGER |
| Q02388 | 2550 | RGLDGDKGPRGDN |
| Q02388 | 2562 | NGDPGDKGSKGEP |
| Q02388 | 2565 | PGDKGSKGEPGDK |
| Q02388 | 2571 | KGEPGDKGSAGLP |
| Q02388 | 2603 | DPGSPGKDGVPPI |
| Q02388 | 2613 | PGIRGEKGDVGFM |
| Q02388 | 2640 | CGLDGEKGDKGEA |
| Q02388 | 2643 | DGEKGDKGEAGPP |
| Q02388 | 2658 | PGLAGHKGEMGEP |
| Q02388 | 2675 | QSGAPGKEGLIGP |
| Q02388 | 2682 | EGLIGPKGDRGFD |
| Q02388 | 2694 | DGQPGPKGDQGEK |
| Q02388 | 2700 | KGDQGEKGERGTP |
| Q02388 | 2742 | EGLQGQKGERGPP |
| Q02388 | 2780 | AGPRGEKGEAALT |
| P19999 | 28   | TCEETLKTCSVIA |
| P19999 | 63   | LQGPPGKLGPPTS |
| P19999 | 79   | PGSQGPKGQKGR  |
| P19999 | 82   | QGPKGQKGRGDS  |
| P19999 | 94   | SRAIEVKLANMEA |
| P19999 | 106  | AEINTLKSLELT  |
| P19999 | 108  | INTLKSLELTNK  |
| P19999 | 114  | KLELTNKLHAFSM |
| P19999 | 122  | HAFSMGKKSCKKF |
| P19999 | 123  | AFSMGKKSCKKFF |
| P19999 | 126  | MGKKSCKKFFVTN |
| P19999 | 127  | GKKSCKKFFVTNH |
| P19999 | 140  | ERMPFSKVKALCS |
| P19999 | 142  | MPFSKVKALCSEL |
| P19999 | 162  | RNAEENKAIQEVA |
| P19999 | 169  | AIQEVAKTSAFLG |
| P19999 | 199  | LTYSNWKKDEPND |
| P19999 | 200  | TYSNWKKDEPNDH |
| P35248 | 23   | DLGAEMKTLQRS  |
| P35248 | 118  | ISGPAGKEGPSGK |
| P35248 | 124  | KEGPSGKQGNIGP |
| P35248 | 133  | NIGPQGPKEAGPK |
| P35248 | 137  | QGPKEAGPK     |
| P35248 | 143  | KGEAGPKGEVGAP |
| P35248 | 158  | QGSAGAKGPAGPK |
| P35248 | 203  | RGPPGLKGRGAP  |
| P35248 | 215  | PGDRGIKGESGLP |
| P35248 | 236  | MEALNGKLQRLEA |
| P35248 | 248  | AAFSRYKKAALFP |
| P35248 | 262  | GQSVGDKIFRAAN |
| P35248 | 277  | EPFEDAKEMCRQA |
| P35248 | 308  | LVTAHSKAAFLSM |
| P35248 | 322  | DVGTEGKFTYPTG |

---

|        |     |               |
|--------|-----|---------------|
| P35248 | 362 | NGQWNDKACGEQR |
| Q9SE35 | 36  | LSTEDSKSAQLIS |
| Q9SE35 | 110 | LRILSSKKSYSYY |
| Q9SE35 | 111 | RILSSKKSYSYS  |
| Q9SE35 | 121 | YYSYGTKKSYSYS |
| Q9SE35 | 122 | YSYGTKKKSYSYS |
| Q9SE35 | 132 | YSGYSTKKSASRR |
| Q9SE35 | 133 | SGYSTKKSASRRI |
| Q9SE35 | 177 | SGSKGSKRRILSS |
| Q9SE35 | 203 | RRNLSSKKSYSYS |
| Q9SE35 | 204 | RNLSSKKSYSYS  |
| O18495 | 51  | AAWQIGKHALGDM |
| O18495 | 67  | EFQDFMKEVEQAR |

© 2014 by the authors; licensee MDPI, Basel, Switzerland. This article is an open access article distributed under the terms and conditions of the Creative Commons Attribution license (<http://creativecommons.org/licenses/by/3.0/>).
