# Supplementary material for: iHyd-PseAAC: Predicting Hydroxyproline and Hydroxylysine in Proteins by Incorporating Dipeptide Position-Specific Propensity into Pseudo Amino Acid Composition
Source: MDPI journal article supplement (doi:10.3390/ijms15057594), 2014-05-05
Supplement: s1 [file s1]

## Supplementary Information

**Supplementary Information S4.** The positive dataset  $\mathbb{S}_{\text{Hyl}}^+$  contains 44 hydroxylysine peptide fragments and the negative dataset  $\mathbb{S}_{\text{Hyl}}^-$  contains 528 non-hydroxylysine peptide fragments. None of the sequences included has  $\geq 40\%$  pairwise sequence identity with any other in a same subset. See the text of the paper for further explanation.

| Positive dataset |          |                        |
|------------------|----------|------------------------|
| Uniprot ID       | Position | Fragments              |
| Q3Y5Z3           | 28       | EDPPLP <b>K</b> GACAGW |
| Q3Y5Z3           | 60       | DGTPGE <b>K</b> GEGKDP |
| Q3Y5Z3           | 63       | PGEKGE <b>K</b> GDPGLV |
| Q3Y5Z3           | 72       | PGLVGP <b>K</b> GDTGET |
| Q15848           | 101      | PGIQGR <b>K</b> GEPGEG |
| Q4ZJN1           | 127      | QGQKGD <b>K</b> GVEGPT |
| P30754           | 183      | PGTPGS <b>K</b> GDRGQS |
| P30754           | 351      | SGEPGA <b>K</b> GPTGDT |
| P30754           | 546      | PGVAGA <b>K</b> GQGGPP |
| P30754           | 567      | PGERGP <b>K</b> GVGGSK |
| P30754           | 933      | KGEAGG <b>K</b> GAKGDK |
| P30754           | 939      | KGAKGD <b>K</b> GWTGLP |
| P84698           | 18       | NGWECC <b>K</b> GYPNV  |
| P84698           | 25       | GYPNV <b>K</b> ACSGCT  |
| P02457           | 419      | SGAPGP <b>K</b> GNSGEP |
| P02457           | 1097     | QGDRGM <b>K</b> GHRGFS |
| P04258           | 95       | PGPPGM <b>K</b> GPAGMP |
| P12108           | 181      | NCPPGP <b>K</b> GPQGLQ |
| P23805           | 63       | ECPHGE <b>K</b> GDPGSP |
| P23805           | 87       | VGPIGP <b>K</b> GDNGFV |
| P23805           | 141      | KGETGP <b>K</b> GGVGAP |
| Q9Y383           | 266      | RSRSHS <b>K</b> NPKRSR |
| Q9Y383           | 269      | SHSKNP <b>K</b> RSRSRE |
| P30943           | 41       | VNMAMD <b>K</b> SAKAPV |
| P01170           | 120      | CKNFYW <b>K</b> GFTSCX |
| P26368           | 15       | RQLNEN <b>K</b> QERDKE |
| P26368           | 276      | LNDDQV <b>K</b> ELLTSF |
| P02745           | 33       | RAPDGK <b>K</b> GEAGRP |
| P04142           | 47       | IRDGIV <b>K</b> AGPAIE |
| P20908           | 795      | PGPRGV <b>K</b> GADGIR |
| P20908           | 804      | DGIRGL <b>K</b> GTKGEK |
| P20908           | 807      | RGLKGT <b>K</b> GEKGED |
| P20908           | 819      | DGFPGF <b>K</b> GDMGIK |
| P20908           | 846      | DGPEGP <b>K</b> GRGGPN |
| P20908           | 882      | PGRQGP <b>K</b> GSIGFP |
| P20908           | 897      | PGANGE <b>K</b> GGRGTP |
| P12111           | 2337     | NGTTGP <b>K</b> GIRGRR |
| Q9SE35           | 174      | GSYSGS <b>K</b> GSKRRI |
| O18495           | 27       | EAGWLR <b>K</b> AAKSVG |
| O18495           | 30       | WLRKAA <b>K</b> SVGKFY |
| O18495           | 34       | AAKSVG <b>K</b> FYYKHK |
| O18495           | 38       | VGKFYY <b>K</b> HKYYIK |
| O18495           | 40       | KFYYKH <b>K</b> YYIKAA |
| O18495           | 44       | KHKYYI <b>K</b> AAWQIG |

## Negative dataset

| Uniprot ID | Position | Fragments       |
|------------|----------|-----------------|
| Q3Y5Z3     | 129      | VPIRFTKIFYNQQ   |
| Q3Y5Z3     | 144      | YDGTGKFLCNIP    |
| Q3Y5Z3     | 164      | HITVYLKDVKVSL   |
| Q3Y5Z3     | 167      | VYLKDVKVS LYKN  |
| Q3Y5Z3     | 172      | VKVS LYKNDKALL  |
| Q3Y5Z3     | 175      | SLYKNDKALLFTH   |
| Q3Y5Z3     | 187      | HDQFQDKNVDQAS   |
| Q3Y5Z3     | 202      | VLLYLEKGDQVWL   |
| Q15848     | 33       | VLLPLPKGACTGW   |
| Q15848     | 178      | KVSLFKKDKAMLF   |
| Q4ZJN1     | 49       | DGRDGA KGDKGDA  |
| Q4ZJN1     | 52       | DGAKGD KGDA GEP |
| Q4ZJN1     | 66       | HPGGPG KDGI RGE |
| Q4ZJN1     | 88       | VEAKGI KGDP GSR |
| Q4ZJN1     | 99       | SRGSPG KHGP KGS |
| Q4ZJN1     | 103      | PGKHGP KGS IGPT |
| Q4ZJN1     | 124      | TGPQGQ KGDKGEV  |
| Q4ZJN1     | 148      | TGPLGP KGLPGPM  |
| Q4ZJN1     | 159      | PMGP IGP GPRGE  |
| Q4ZJN1     | 184      | RGMRGW KGDRGEK  |
| Q4ZJN1     | 190      | KGDRGE KGKVGEA  |
| Q4ZJN1     | 192      | DRGEKG KVGEAPL  |
| Q4ZJN1     | 201      | EAPLVP KSAFTVG  |
| Q4ZJN1     | 213      | GLTVIS KFPPDA   |
| Q4ZJN1     | 222      | PPDAPI KFDKILY  |
| Q4ZJN1     | 225      | APIKFD KILYNEL  |
| Q4ZJN1     | 240      | YNVATG KFTCHVA  |
| Q4ZJN1     | 268      | VQVSLV KNGVKVL  |
| Q4ZJN1     | 272      | LVKNGV KVLHTKD  |
| Q4ZJN1     | 277      | VKVLHT KDSYMSS  |
| Q4ZJN1     | 296      | GIVQEL KLGDEVW  |
| P30754     | 62       | PAGIAG KSGDDGR  |
| P30754     | 96       | PGMPGP KGHRGFR  |
| P30754     | 108      | RGLSGS KGEQGKS  |
| P30754     | 113      | SKGEQG KSGNQGP  |
| P30754     | 146      | ERGRDG KSGLPGL  |
| P30754     | 299      | HAGEAG KRGS PGS |
| P30754     | 383      | SDGRPG KDGRPGI  |
| P30754     | 395      | IRKDG KQGEQGP   |
| P30754     | 425      | ARGE PGKNGAPGE  |
| P30754     | 443      | EQGDAG KDGETGA  |
| P30754     | 573      | KGVGGS KGSRGDI  |
| P30754     | 584      | DIGPRG KAGERGK  |
| P30754     | 612      | SGLAAS KGERGDM  |
| P30754     | 657      | AGPAGT KGDIGFP  |
| P30754     | 686      | PRGLAG KRGLRGA  |
| P30754     | 738      | AGKQGV KGARGSP  |
| P30754     | 749      | SPGLVG KQGDRGS  |
| P30754     | 765      | PGRDGT KGERGED  |
| P30754     | 810      | MGGQGM KGDGGPP  |
| P30754     | 927      | AGIMGM KGEAGGK  |
| P02457     | 43       | GLTYND KDVWKPE  |
| P02457     | 47       | NDKDVW KPEPCQI  |
| P02457     | 107      | AGVEGP KGD TGPR |
| P02457     | 160      | SYGYDE KSAGVAV  |
| P02457     | 341      | PGAAGA KGETGPQ  |

---

|        |      |                |
|--------|------|----------------|
| P02457 | 386  | DGQPGAKGATGAP  |
| P02457 | 541  | SPGPDGKTGPPGP  |
| P02457 | 646  | PPGEAGKPGEQGV  |
| P02457 | 923  | PGPPGEKGS PGAD |
| P02457 | 973  | PSGEPGKQG PSGA |
| P02457 | 1141 | SAGAAGKDGLNGL  |
| P02457 | 1197 | PQPPQEK AHDGGR |
| P02457 | 1225 | EVD TTLKSLSQQI |
| P02457 | 1242 | SPEGTRKNPARTC  |
| P02457 | 1252 | RTCRDLKMCHGDW  |
| P02457 | 1259 | MCHGDWKSGEYWI  |
| P02457 | 1277 | CNLDAIKVYCNME  |
| P02457 | 1299 | QATIAQKNWYLSK  |
| P02457 | 1305 | KNWYLSKNPKEKK  |
| P02457 | 1308 | YLSKNPKEKKHVV  |
| P02457 | 1310 | SKNPKEKKHVWFG  |
| P02457 | 1311 | KNPKEKKHVWFG   |
| P02457 | 1360 | NVTYHCKNSVAYM  |
| P02457 | 1374 | HDTGNLKKALLLQ  |
| P02457 | 1375 | DTGNLKKALLLQG  |
| P02457 | 1413 | HTGAWGKTVIEYK  |
| P02457 | 1419 | KTVIEYKTTKTSR  |
| P02457 | 1422 | IEYKTTKTSRLPI  |
| P02459 | 30   | HGQDVQKAGSCVQ  |
| P02459 | 73   | IICEDMKDCLSP   |
| P02459 | 113  | GEPGDIKDIVGPK  |
| P02459 | 119  | KDIVGPKGPPGPQ  |
| P02459 | 140  | RGDRGDKGEGAP   |
| P02459 | 143  | RGDKGEGKAPGPR  |
| P02459 | 190  | AGGFDEKAGGAQM  |
| P02459 | 884  | TGVTGPKGARGAQ  |
| P02459 | 1174 | PVGPSGKDGANGI  |
| P02459 | 1231 | GLGQREKGPDP LQ |
| P02459 | 1333 | NPASVPKKNWWSS  |
| P02459 | 1334 | PASVPKKNWWSSK  |
| P02459 | 1340 | KNWWSSKSKDKKH  |
| P02459 | 1342 | WWSSKSKDKKHIW  |
| P02459 | 1435 | FTYTVLKD GCTKH |
| P02459 | 1440 | LKDGCTKHTGKWG  |
| P02459 | 1444 | CTKHTGKWGKTMI  |
| P04258 | 8    | YEAYDVKSGVAGG  |
| P04258 | 239  | DGSPGGKGEMGPA  |
| P04258 | 436  | NDGAPGKNGERGG  |
| P04258 | 551  | PGPEGGKGAAGPP  |
| P12108 | 87   | DGLTGAKGSRGPW  |
| P12108 | 207  | EPGQQGKQGPKGD  |
| P12108 | 211  | QGKQGPKG DVGVS |
| P12108 | 250  | TGPAGYKGMVGTI  |
| P12108 | 463  | SGEPGPKGQQGIQ  |
| P12108 | 529  | IIDVVLKMMQEQL  |
| P12108 | 543  | EVAVSAKRAALGG  |
| P12108 | 634  | GHALAGKDGERGP  |
| Q05707 | 7    | MKIFQRKMRYWLL  |
| Q05707 | 51   | SIQISWKAPRGKF  |
| Q05707 | 56   | WKAPRGKFGGYKL  |
| Q05707 | 61   | GKFGGYKLLVTPT  |
| Q05707 | 71   | TPTSGGKTNQLNL  |
| Q05707 | 83   | LQNTATKAI IQGL |
| Q05707 | 104  | QIIAYNKDKESKP  |

---

---

|        |      |                                                 |
|--------|------|-------------------------------------------------|
| Q05707 | 106  | IAYNKD <b>K</b> ESKPAQ                          |
| Q05707 | 109  | NKD <b>K</b> ES <b>K</b> PAQGQF                 |
| Q05707 | 118  | QGQFRI <b>K</b> DLEKRK                          |
| Q05707 | 122  | RIKDLE <b>K</b> RKDPKP                          |
| Q05707 | 124  | KDLEKR <b>K</b> DPKPRV                          |
| Q05707 | 127  | EKRKDP <b>K</b> PRVKVV                          |
| Q05707 | 131  | DPKPRV <b>K</b> VVDRGN                          |
| Q05707 | 148  | SSPEEV <b>K</b> FVCQTP                          |
| Q05707 | 194  | FDVGSE <b>K</b> TRIGLA                          |
| Q05707 | 218  | LNAFST <b>K</b> DEVIEA                          |
| Q05707 | 231  | VRNL <b>P</b> Y <b>K</b> GGNTLT                 |
| Q05707 | 250  | IFENS <b>F</b> <b>K</b> PEAGSR                  |
| Q05707 | 261  | SRTGV <b>S</b> <b>K</b> IGILIT                  |
| Q05707 | 270  | ILITD <b>G</b> <b>K</b> SQDDII                  |
| Q05707 | 295  | LFAIGV <b>K</b> NADVNE                          |
| Q05707 | 346  | EQDREI <b>K</b> ASAHAI                          |
| Q05707 | 382  | APGNVE <b>K</b> YRVVYY                          |
| Q05707 | 394  | YPTRG <b>G</b> <b>K</b> PDEVVV                  |
| Q05707 | 410  | VSSTVL <b>K</b> NLM <b>S</b> LT                 |
| Q05707 | 462  | ENSMRV <b>K</b> WD <b>A</b> VP <b>G</b>         |
| Q05707 | 488  | GLAGDE <b>K</b> EMKIGE                          |
| Q05707 | 491  | GDEKEM <b>K</b> IGETHT                          |
| Q05707 | 591  | ITTFPL <b>K</b> GLT <b>P</b> LT                 |
| Q05707 | 655  | ADEGLH <b>K</b> LMWIPV                          |
| Q05707 | 665  | IPVYGG <b>K</b> TEEVVL                          |
| Q05707 | 672  | TEEVVL <b>K</b> EEQDSH                          |
| Q05707 | 754  | TSSLRV <b>K</b> WDISDS                          |
| Q05707 | 796  | QNNLLL <b>K</b> P <b>L</b> L <b>P</b> DT        |
| Q05707 | 805  | LPDTEY <b>K</b> VT <b>V</b> T <b>P</b> I        |
| Q05707 | 825  | SVSAP <b>G</b> <b>K</b> TL <b>P</b> SS <b>G</b> |
| Q05707 | 857  | PPSSPV <b>K</b> G <b>Y</b> RIVY                 |
| Q05707 | 864  | GYRIVY <b>K</b> PVSV <b>P</b> G                 |
| Q05707 | 898  | GMDYNV <b>K</b> IFASQA                          |
| Q05707 | 916  | ALTGMV <b>K</b> TL <b>F</b> LG <b>V</b>         |
| Q05707 | 928  | VTNLQA <b>K</b> HVEMTS                          |
| Q05707 | 960  | SLQDR <b>Q</b> <b>K</b> QESTVG                  |
| Q05707 | 984  | QPDSEY <b>K</b> ISVYTK                          |
| Q05707 | 990  | KISVYT <b>K</b> LQEIEG                          |
| Q05707 | 1004 | SVSIME <b>K</b> TQSLPT                          |
| Q05707 | 1023 | PTIPPA <b>K</b> EVCKAA                          |
| Q05707 | 1027 | PAKEVC <b>K</b> AAKADL                          |
| Q05707 | 1030 | EVCKAA <b>K</b> ADLVFM                          |
| Q05707 | 1050 | GDENFN <b>K</b> IISFLY                          |
| Q05707 | 1064 | TVGALN <b>K</b> IGTDGT                          |
| Q05707 | 1086 | DPRT <b>E</b> <b>F</b> <b>K</b> LNAYKT          |
| Q05707 | 1091 | FKLNAY <b>K</b> TKETLL                          |
| Q05707 | 1093 | LNAYKT <b>K</b> ETLLDA                          |
| Q05707 | 1101 | TLLDAI <b>K</b> HISYKG                          |
| Q05707 | 1106 | IKHISY <b>K</b> GGNTKT                          |
| Q05707 | 1111 | YKGGNT <b>K</b> TGKA <b>I</b> K                 |
| Q05707 | 1114 | GNTKT <b>G</b> KA <b>I</b> KYVR                 |
| Q05707 | 1117 | KTGKA <b>I</b> <b>K</b> YVRDTL                  |
| Q05707 | 1136 | TRRGIP <b>K</b> VIVVIT                          |
| Q05707 | 1152 | SQDDVN <b>K</b> ISREM <b>Q</b>                  |
| Q05707 | 1183 | LVSIG <b>S</b> <b>K</b> PSARHV                  |
| Q05707 | 1199 | DDF <b>D</b> AF <b>K</b> KIEDEL                 |
| Q05707 | 1200 | DFDA <b>F</b> <b>K</b> KIEDELI                  |
| Q05707 | 1222 | TCPVVH <b>K</b> DGIDLA                          |
| Q05707 | 1231 | IDLAG <b>F</b> <b>K</b> MMEMFG                  |

---

---

|        |      |                |
|--------|------|----------------|
| Q05707 | 1241 | MFGLVEKDFSSVE  |
| Q05707 | 1266 | PCYQLHKDALVSQ  |
| Q05707 | 1311 | LWEILNKNSDPLV  |
| Q05707 | 1326 | ILDNGGKTLTYFN  |
| Q05707 | 1351 | EGPEIRKIFYGSF  |
| Q05707 | 1359 | FYGSFHKLHIVVS  |
| Q05707 | 1370 | VSETLVKVVIDCK  |
| Q05707 | 1376 | KVVIDCKQVGEKA  |
| Q05707 | 1381 | CKQVGEKAMNASA  |
| Q05707 | 1399 | GVEVLGKMVRSRG  |
| Q05707 | 1431 | SWANTDKCCELPG  |
| Q05707 | 1558 | QRGLPGKDGSSGP  |
| P23805 | 29   | MTTFSQKILANAC  |
| P23805 | 122  | REGPSGKQGSMP   |
| P23805 | 222  | AEVNALKQRTIL   |
| P23805 | 243  | NAFSQYKKAVLFP  |
| P23805 | 244  | AFSQYKKAVLFPD  |
| P23805 | 257  | GQAVGEKIFKTAG  |
| P23805 | 260  | VGEKIFKTAGAVK  |
| P23805 | 266  | KTAGAVKSYSDAE  |
| P23805 | 279  | QLCREAKGQLASP  |
| P23805 | 303  | MVRAQEKNAAYLSM |
| P23805 | 355  | EIFPDGKWNDVPC  |
| P23805 | 363  | NDVPCSKQLLVIC  |
| Q9Y383 | 29   | TTRQRIKFSDDR   |
| Q9Y383 | 37   | SDDRVCKSHLLNC  |
| Q9Y383 | 61   | DLGECLKVHDLAL  |
| Q9Y383 | 76   | DYEIASKEQDFFF  |
| Q9Y383 | 105  | RRTEVAKKRLAET  |
| Q9Y383 | 106  | RTEVAKKRLAETQ  |
| Q9Y383 | 122  | SAEVAAKAERVHE  |
| Q9Y383 | 135  | LNEEIGKLLAKVE  |
| Q9Y383 | 139  | IGKLLAKVEQLGA  |
| Q9Y383 | 154  | NVEESQKVMDEVE  |
| Q9Y383 | 161  | VMDEVEKARAKKR  |
| Q9Y383 | 165  | VEKARAKKREAE   |
| Q9Y383 | 166  | EKARAKKREAEV   |
| Q9Y383 | 186  | SSFQQQKLRVCEV  |
| Q9Y383 | 213  | ADHFGGKLHLGFI  |
| Q9Y383 | 224  | FIEIREKLEELKR  |
| Q9Y383 | 229  | EKLEELKRVVAEK  |
| Q9Y383 | 235  | KRVVAEKQEKRNQ  |
| Q9Y383 | 238  | VAEKQEKRNQERL  |
| Q9Y383 | 245  | RNQERLKRREERE  |
| Q9Y383 | 257  | EREEREKLRRSRS  |
| Q9Y383 | 289  | SMSRERKRRTRSK  |
| Q9Y383 | 295  | KRRTRSKSREKRH  |
| Q9Y383 | 299  | RSKSREKRHRHS   |
| Q9Y383 | 332  | RSRERSKRRSSKE  |
| Q9Y383 | 337  | SKRRSSKERFRDQ  |
| Q9Y383 | 365  | PRDRDRKDKKRSY  |
| Q9Y383 | 367  | DRDRDKKRSYES   |
| Q9Y383 | 368  | RDRDKKRSYESA   |
| P30943 | 44   | AMDKSAKAPVITI  |
| P30943 | 61   | GCSRAPKEYTGAK  |
| P30943 | 67   | KEYTGAKAGKDD   |
| P30943 | 71   | GAKAGGKDDEMMV  |
| P30943 | 78   | DDEMMVKAQSVKI  |
| P30943 | 83   | VKAQSVKIEVSTG  |

---

---

|        |      |                        |
|--------|------|------------------------|
| Q00433 | 98   | VKVA <b>STK</b> VTVSES |
| Q00433 | 108  | SESDAA <b>KKL</b> QEFI |
| Q00433 | 109  | ESDAA <b>KKL</b> QEFIT |
| Q00433 | 118  | EFITFE <b>K</b> GIDGPF |
| P01170 | 61   | LSQEW <b>S</b> KRAVEEL |
| P01170 | 111  | LPPRER <b>K</b> AGCKNF |
| P01170 | 115  | ERKAGC <b>K</b> NFYWKG |
| P26368 | 20   | NKQERD <b>K</b> ENRHRK |
| P26368 | 26   | KENRHR <b>K</b> RSHSRS |
| P26368 | 63   | DRRRRS <b>K</b> PLTRGA |
| P26368 | 70   | PLTRGA <b>K</b> EEHGGL |
| P26368 | 84   | RSPRHE <b>K</b> KKKVRK |
| P26368 | 85   | SPRHE <b>K</b> KKKVRKY |
| P26368 | 86   | PRHE <b>K</b> KKKVRKYW |
| P26368 | 87   | RHE <b>K</b> KKKVRKYWD |
| P26368 | 90   | KKK <b>K</b> VRKYWDVPP |
| P26368 | 108  | ITPMQY <b>K</b> AMQAAG |
| P26368 | 195  | VQINQD <b>K</b> NFAFLE |
| P26368 | 225  | FQGQSL <b>K</b> IRRPD  |
| P26368 | 260  | VPDSA <b>HKL</b> FIGGL |
| P26368 | 286  | TSFGPL <b>K</b> AFNLVK |
| P26368 | 292  | KAFNLV <b>K</b> DSATGL |
| P26368 | 300  | SATGL <b>S</b> KGYAFCE |
| P26368 | 328  | GMQLGD <b>K</b> KLVLQR |
| P26368 | 329  | MQLGD <b>K</b> KLVLQRA |
| P26368 | 340  | RASVGAK <b>N</b> ATLVS |
| P26368 | 408  | VRDECS <b>K</b> YGLVKS |
| P26368 | 413  | SKYGLV <b>K</b> SIEIPR |
| P26368 | 431  | EVPGCG <b>K</b> IFVEFT |
| P26368 | 444  | SVFDCQ <b>K</b> AMQGLT |
| P26368 | 453  | QGLTGR <b>K</b> FANRVV |
| P26368 | 462  | NRVVVT <b>K</b> YCDPDS |
| P02745 | 32   | CRAPDG <b>K</b> KGEAGR |
| P02745 | 110  | GSPGNI <b>K</b> DQPRPA |
| P02745 | 195  | FCDTTN <b>K</b> GLFQVV |
| P02745 | 219  | DQVWVE <b>K</b> DPKKGH |
| P02745 | 222  | WVEKDP <b>K</b> KGHIYQ |
| P02745 | 223  | VEKDP <b>K</b> KGHIYQG |
| P02747 | 14   | LPHLGL <b>K</b> LLLLLL |
| P02747 | 115  | GEEGRY <b>K</b> QKFQSV |
| P02747 | 117  | EGRY <b>K</b> QKFQSVFT |
| P02747 | 161  | TGKFTC <b>K</b> VPGLYY |
| P02747 | 188  | LYRSGV <b>K</b> VVTFCG |
| P02747 | 198  | FCGHTS <b>K</b> TNQVNS |
| P04142 | 5    | XXMNF <b>A</b> KILSFVF |
| P04142 | 29   | APEPRW <b>K</b> IFKKIE |
| P04142 | 32   | PRWKIF <b>K</b> KIEKMG |
| P04142 | 33   | RWKIF <b>K</b> KIEKMGR |
| P04142 | 36   | IFKKIE <b>K</b> MGRNIR |
| P04142 | 59   | EVLGSA <b>K</b> AIGKXX |
| P02453 | 79   | VICDEL <b>K</b> DCPNAK |
| P02453 | 85   | KDCPN <b>A</b> KVPTDEC |
| P02452 | 67   | CVCDNG <b>K</b> VLCDDV |
| P02452 | 430  | GGPPGP <b>K</b> GNSGEP |
| P02454 | 45   | PNGETW <b>K</b> PDVCLI |
| P02454 | 67   | CDGVLC <b>K</b> EDLDCP |
| P02454 | 77   | DCPNP <b>Q</b> KREGECC |
| P02454 | 896  | VGKEGG <b>K</b> GPRGET |
| P02454 | 1299 | QPSVP <b>Q</b> KNWYISP |

---

---

|        |      |                |
|--------|------|----------------|
| P02461 | 7    | MMSFVQKGSWLLL  |
| P02461 | 503  | NGIPGEKGPAGER  |
| P02461 | 1212 | AGIGGEKAGGFAP  |
| P02461 | 1228 | DEPMDFKINTDEI  |
| P02461 | 1239 | EIMTSLKSVNGQI  |
| P02461 | 1286 | DPNQGCKLDAIKV  |
| P02461 | 1313 | PLNVPRKHWWTDS  |
| P02461 | 1387 | QASGNVKKALKLM  |
| P02461 | 1391 | NVKKALKLMGSNE  |
| P02461 | 1401 | SNEGEFKAEGNSK  |
| P02461 | 1407 | KAEGNSKFTYTVL  |
| P20908 | 8    | DVHTRWKARSALR  |
| P20908 | 44   | QPADLLKVLDFHN  |
| P20908 | 57   | LPDGITKTTGFCA  |
| P20908 | 69   | ATRRSSKGPDVAY  |
| P20908 | 79   | VAYRVTKDAQLSA  |
| P20908 | 88   | QLSAPTQQLYPAS  |
| P20908 | 107  | SILTTVKAKKGSQ  |
| P20908 | 109  | LTTVKAKKGSQAF  |
| P20908 | 110  | TTVKAKKGSQAFL  |
| P20908 | 146  | YEDHTGKPGPEDY  |
| P20908 | 164  | INLSDGKWHRIAL  |
| P20908 | 174  | IALSVHKKNVTLI  |
| P20908 | 175  | ALSVHKKNVTLIL  |
| P20908 | 184  | TLILDCKKKTTKF  |
| P20908 | 185  | LILDCKKKTTKFL  |
| P20908 | 186  | ILDCKKKTTKFLD  |
| P20908 | 189  | CKKKTTKFLDRSD  |
| P20908 | 288  | DPEDLGKEPTPSK  |
| P20908 | 294  | KEPTPSKKPVEAA  |
| P20908 | 295  | EPTPSKKPVEAAK  |
| P20908 | 301  | KPVEAAKETTEVP  |
| P20908 | 329  | TSEGAGKEEDVGI  |
| P20908 | 455  | RGEKGQKGEPAL   |
| P20908 | 535  | GGDAGSKGPMVSA  |
| P20908 | 582  | PGSGGLKGEPGDV  |
| P20908 | 1074 | VGALGLKGNEGPP  |
| P20908 | 1167 | IGEPGQKGSKGDK  |
| P20908 | 1410 | QGEKGAKGEAGLE  |
| P20908 | 1473 | PGLPGLKGDSGPK  |
| P20908 | 1619 | GSLNSLKLEIEQM  |
| P20908 | 1626 | LEIEQMKRPLGTQ  |
| P20908 | 1640 | NPARTCKDLQLCH  |
| P20908 | 1668 | CSRDSFKVYCNFT  |
| P20908 | 1685 | TCVFDPKKSEGAR  |
| P20908 | 1686 | CVFPDKKSEGARI  |
| P20908 | 1697 | RITSWPKENPGSW  |
| P20908 | 1708 | SWFSEFKRGKLLS  |
| P20908 | 1711 | SEFKRGKLLSYVD  |
| P20908 | 1762 | ATGSYDKALRFLG  |
| P20908 | 1792 | VDGCATKKGQYQKT |
| P20908 | 1793 | DGCATKKGQYQKT  |
| P20908 | 1797 | TKKGQYQKTVLEID |
| P20908 | 1806 | LEIDTPKVEQVPI  |
| P20908 | 1826 | FGEASQKFGFEVG  |
| P12111 | 33   | QQQADVKNAAAD   |
| P12111 | 67   | FLYDVVKSLAVGE  |
| P12111 | 99   | LNTYRTKQEVLSH  |
| P12111 | 120  | GTNQTGKGLEYIM  |

---



---

|        |      |        |         |
|--------|------|--------|---------|
| P12111 | 132  | MQSHLT | KAAGSRA |
| P12111 | 155  | LTDGHS | KDGLALP |
| P12111 | 166  | LPSAEL | KSADVNV |
| P12111 | 186  | ADEGAL | KEIASEP |
| P12111 | 233  | GDTETL | KDITAQD |
| P12111 | 271  | LVNLLE | KLPIGTQ |
| P12111 | 302  | LDTYST | KAQVLGA |
| P12111 | 310  | QVLGAV | KALGFAG |
| P12111 | 370  | YGVVAL | KQASVFS |
| P12111 | 414  | FGDLQE | KLLPYIV |
| P12111 | 430  | QRHIVL | KPPTIVT |
| P12111 | 443  | QVIEVN | KRDIVFL |
| P12111 | 470  | IRDFIA | KVIQRLE |
| P12111 | 505  | FNTHPT | KREVITA |
| P12111 | 514  | VITAVR | KMKPLDG |
| P12111 | 516  | TAVRKM | KPLDGSA |
| P12111 | 551  | AAEGIP | KLLVLIT |
| P12111 | 573  | QPAQEL | KRSSIMA |
| P12111 | 637  | PEVHSN | KRDIIFL |
| P12111 | 652  | GSANVG | KTNFPYV |
| P12111 | 783  | GASQAN | KAELEQI |
| P12111 | 835  | LAQPES | KRDILFL |
| P12111 | 861  | VRDFLY | KIIDELN |
| P12111 | 869  | IDELNV | KPEGTRI |
| P12111 | 885  | QYSDDV | KVESRFD |
| P12111 | 896  | FDEHQS | KPEILNL |
| P12111 | 904  | EILNLV | KRMKIKT |
| P12111 | 907  | NLVKRM | KIKTGKA |
| P12111 | 909  | VKRMKI | KTGKALN |
| P12111 | 912  | MKIKTG | KALNLGY |
| P12111 | 930  | QRYIFV | KSAGSRI |
| P12111 | 964  | GPASNL | KQSGVVP |
| P12111 | 976  | PFIFQA | KNADPAE |
| P12111 | 1001 | AAESLP | KIGDLHP |
| P12111 | 1014 | QIVNLL | KSVHNGA |
| P12111 | 1028 | APVSGE | KDVVFL  |
| P12111 | 1048 | SGFPLL | KEFVQRV |
| P12111 | 1088 | LNSYMN | KQDVVNA |
| P12111 | 1156 | NPSVVV | KRGGAVP |
| P12111 | 1231 | SPGVGG | KRDVVFL |
| P12111 | 1281 | QFSDDP | KVEFLLN |
| P12111 | 1305 | VQRLRP | KGGRQIN |
| P12111 | 1325 | VSRNIF | KRPLGSR |
| P12111 | 1347 | VLISSG | KSDDEVD |
| P12111 | 1380 | DQEELV | KISLSPE |
| P12111 | 1403 | LPSLEQ | KLLTPIT |
| P12111 | 1418 | TSEQIQ | KLLASTR |
| P12111 | 1472 | LNIGPS | KVRVGVV |
| P12111 | 1491 | FPEFYL | KTYRSQA |
| P12111 | 1518 | SPLNTG | KALEFVA |
| P12111 | 1551 | VLVLGG | KSQDDVS |
| P12111 | 1635 | PPSRPE | KKKADIV |
| P12111 | 1636 | PSRPEK | KKADIVF |
| P12111 | 1637 | SRPEKK | KADIVFL |
| P12111 | 1694 | TDEFFL | KDFSTKR |
| P12111 | 1699 | LKDFST | KRQIIDA |
| P12111 | 1708 | IIDAIN | KVVYKGG |
| P12111 | 1712 | INKVVY | KGGRHAN |
| P12111 | 1720 | GRHANT | KVGLEHL |

---



---

|        |      |                |
|--------|------|----------------|
| P12111 | 1754 | FVITGGKSVEDAQ  |
| P12111 | 1772 | LTQRGVQVFAVG   |
| P12111 | 1788 | DSEEVGKIASNSA  |
| P12111 | 1833 | GVTDAAKACNLDV  |
| P12111 | 1856 | NVFVAQKGFESKV  |
| P12111 | 1861 | QKGFESKVDAILN  |
| P12111 | 1913 | QPEMLEKFRNMRS  |
| P12111 | 1931 | LTEDTLKVYLNKF  |
| P12111 | 1936 | LKVYLNKFRQSSP  |
| P12111 | 1946 | SSPDSVKVVIHFT  |
| P12111 | 2027 | LDNIAEKACCGVP  |
| P12111 | 2035 | CCGVPCKCSGQRG  |
| P12111 | 2052 | IGSIGPKGIPGED  |
| P12111 | 2121 | DGEDGDKGLPGSS  |
| P12111 | 2170 | SQERGPKGETGDL  |
| P12111 | 2196 | GPGETGKNGGFGR  |
| P12111 | 2355 | PGIVGQKGDPGYP  |
| P12111 | 2384 | ALIQSIKDKCPCC  |
| P12111 | 2386 | IQSIKDKCPCCYG  |
| P12111 | 2464 | IRFADSKRKSVLL  |
| P12111 | 2466 | FADSKRKSVLLDK  |
| P12111 | 2472 | KSVLLDKIKNLQV  |
| P12111 | 2474 | VLLDKIKNLQVAL  |
| P12111 | 2483 | QVALTSKQQSLET  |
| P12111 | 2500 | VARNTFKRVNRNGF |
| P12111 | 2510 | NGFLMRKVAVFFS  |
| P12111 | 2532 | LREAVLKLSDAGI  |
| P12111 | 2639 | FQFNEMKKYIAYL  |
| P12111 | 2640 | QFNEMKKYIAYLV  |
| P12111 | 2656 | DMSPDPKASQHFA  |
| P12111 | 2684 | ASMPPVKVEFSLT  |
| P12111 | 2695 | LTDYGSKEKLVDF  |
| P12111 | 2697 | DYGSKEKLVDFLS  |
| P12111 | 2737 | PNPRDLKIVVLML  |
| P12111 | 2763 | RVILQAKCKGYFF  |
| P12111 | 2765 | ILQAKCKGYFFVV  |
| P12111 | 2777 | VLGIGRKVNIKEV  |
| P12111 | 2781 | GRKVNIKEVYTFA  |
| P12111 | 2796 | PNDVFFKLVDKST  |
| P12111 | 2800 | FFKLVDKSTELNE  |
| P12111 | 2834 | LSPDIRKQCDWFQ  |
| P12111 | 2846 | QGDQPTKNLVKFG  |
| P12111 | 2850 | PTKNLVKFGHKQV  |
| P12111 | 2854 | LVKFGHKQVNVPN  |
| P12111 | 2875 | NPVTTTKPVTITTK |
| P12111 | 2895 | PVTTTTKPVITIIN |
| P12111 | 2906 | INQPSVKPAAAKP  |
| P12111 | 2911 | VKPAAAKPAPAKP  |
| P12111 | 2921 | AKPVAAKPVATKM  |
| P12111 | 2926 | AKPVATKMATVRP  |
| P12111 | 2937 | RPPVAVKPATAAK  |
| P12111 | 2943 | KPATAAKPVAAKP  |
| P12111 | 2986 | TKPATTKPMVKMS  |
| P12111 | 2990 | TTKPMVKMSREVQ  |
| P12111 | 3006 | ITENSAKLHWERA  |
| P12111 | 3035 | DQSLVLKQNLTVT  |
| P12111 | 3077 | HGSFSTKKSQPPP  |
| P12111 | 3078 | GSFSTKKSQPPPP  |
| P12111 | 3113 | TETDICKLPKDEG  |

---

---

|        |      |                |
|--------|------|----------------|
| P12111 | 3116 | DICKLPKDEGTCR  |
| P12111 | 3127 | CRDFILKWYYDPN  |
| P12111 | 3135 | YYDPNTKSCARFW  |
| P12111 | 3151 | CGGNENKFGSQKE  |
| P12111 | 3156 | NKFGSQKECEKVC  |
| P12111 | 3160 | SQKECEKVCAPVL  |
| P12111 | 3168 | CAPVLAKPGVISV  |
| Q02388 | 164  | TAAQRLKGQGVKL  |
| Q02388 | 184  | ADPEELKRVASQP  |
| Q02388 | 263  | GPVTGYKVQYTPL  |
| Q02388 | 459  | GLEPPQKVVLPSD  |
| Q02388 | 727  | SAHGPEKSQLVSG  |
| Q02388 | 1253 | CPVYCPKGQKGEP  |
| Q02388 | 1256 | YCPKGQKGEPGEM  |
| Q02388 | 1399 | LPGTAMKGDKGDR  |
| Q02388 | 1447 | PGKKGEKGDSGDG  |
| Q02388 | 1533 | TGRQGEKGEPGRP  |
| Q02388 | 1718 | GPGAREKGEPGDR  |
| Q02388 | 1786 | RSGLDGKPGAAGP  |
| Q02388 | 1843 | KPGLNGKNGEPGD  |
| Q02388 | 1952 | LETAGIKASALRE  |
| Q02388 | 1981 | ERRRGPKGDSGEQ  |
| Q02388 | 1992 | EQGPPGKEGPIGF  |
| Q02388 | 2166 | MAGPEGKPGLQGP  |
| Q02388 | 2519 | AGLKGDKGDSAVI  |
| Q02388 | 2550 | RGLDGDGKPRGDN  |
| Q02388 | 2780 | AGPRGEKGEEALT  |
| P19999 | 28   | TCEETLKTCSVIA  |
| P19999 | 94   | SRAIEVKLANMEA  |
| P19999 | 106  | AEINTLKSLELT   |
| P19999 | 108  | INTLKSLELTNK   |
| P19999 | 114  | KLELTNKLHAFSM  |
| P19999 | 122  | HAFSMGKKS GKFF |
| P19999 | 123  | AFSMGKKS GKFF  |
| P19999 | 126  | MGKKS GKFFVTN  |
| P19999 | 127  | GKKS GKFFVTNH  |
| P19999 | 140  | ERMPFSKV KALCS |
| P19999 | 142  | MPFSKV KALCSEL |
| P19999 | 162  | RNAEENKAIQEVA  |
| P19999 | 169  | AIQEVAKTS AFLG |
| P19999 | 199  | LTYSNWKDEPN    |
| P19999 | 200  | TYSNWKDEPN     |
| P35248 | 23   | DLGAEMKTL SQR  |
| P35248 | 236  | MEALNGKLQRLEA  |
| P35248 | 277  | EPFEDAKEMCRQA  |
| P35248 | 308  | LVTAHSKAAFLSM  |
| P35248 | 322  | DVGTEGKFTYPTG  |
| P35248 | 362  | NGQWNDKACGEQR  |
| Q9SE35 | 36   | LSTEDSKSAQLIS  |
| Q9SE35 | 110  | LRILSSKKS GSY  |
| Q9SE35 | 111  | RILSSKKS GSY   |
| Q9SE35 | 121  | YYSYGTKKS GSY  |
| Q9SE35 | 122  | YSYGTKKS GSY   |
| Q9SE35 | 132  | YSGYSTKKSASRR  |
| Q9SE35 | 133  | SGYSTKKSASRRI  |
| Q9SE35 | 177  | SGSKGSKRRILSS  |
| O18495 | 51   | AAWQIGKHALGDM  |
| O18495 | 67   | EFQDFMKEVEQAR  |

---
